# Supplementary material
Source: PubMed Central journal article supplement (PMC5392756)

# Supporting Information

## Discovery of [1,2,3]Triazolo[4,5-d]pyrimidine Derivatives as Novel LSD1 Inhibitors

*Zhong-Hua Li<sup>#</sup>, Xue-Qi Liu<sup>#</sup>, Peng-Fei Geng, Feng-Zhi Suo, Jin-Lian Ma, Bin Yu,  
Tao-Qian Zhao, Zhao-Qing Zhou, Chen-Xi Huang,  
Yi-Chao Zheng\*, Hong-Min Liu\**

Key Laboratory of Technology of Drug Preparation (Zhengzhou University), Ministry of Education; Key Laboratory of Henan Province for Drug Quality and Evaluation; Collaborative Innovation Center of New Drug Research and Safety Evaluation, Henan Province; Institute of Drug Discovery and Development, Zhengzhou University, 100 Kexue Avenue, Zhengzhou, Henan 450001, China.

Corresponding Author:

Prof. Hong-Min Liu ([liuhm@zzu.edu.cn](mailto:liuhm@zzu.edu.cn))

### Contents:

|            |                                                                               |                |
|------------|-------------------------------------------------------------------------------|----------------|
| <b>1</b>   | <b>Biological assay section</b>                                               | <b>Page 2</b>  |
| <b>1.1</b> | <b>Inhibitory evaluation of compound 27 against<br/>LSD1, MAO-A and MAO-B</b> | <b>Page 2</b>  |
| <b>1.2</b> | <b>Cell viability assay</b>                                                   | <b>Page 2</b>  |
| <b>1.3</b> | <b>Reversibility analysis</b>                                                 | <b>Page 2</b>  |
| <b>1.4</b> | <b>Western blot</b>                                                           | <b>Page 3</b>  |
| <b>1.5</b> | <b>Transwell</b>                                                              | <b>Page 3</b>  |
| <b>2</b>   | <b>Molecular docking</b>                                                      | <b>Page 4</b>  |
| <b>3</b>   | <b>Chemistry</b>                                                              | <b>Page 4</b>  |
| <b>4</b>   | <b>References</b>                                                             | <b>Page 15</b> |
| <b>5</b>   | <b><sup>1</sup>H and <sup>13</sup>CNMR spectra</b>                            | <b>Page 16</b> |

## **1. Biological assay**

### **1.1 Inhibitory evaluation of compound 27 against LSD1, MAO-A and MAO-B**

Inhibitory effects of the candidate compounds against LSD1 were evaluated according to our previously reported methods.<sup>1</sup> Full length LSD1 cDNA encoding LSD1 was obtained by RT-PCR and cloned into pET-28b (pET-28b-LSD1). Then the plasmid pET-28b-LSD1 was transfected into BL21 (DE). The recombinant was induced with 0.25 mM IPTG at 20 °C and purified following affinity chromatography, ion exchange chromatography and gel filtration. Then the compounds were incubated with the recombinant and H3K4me2. After that, the fluorescence was measured at excitation wavelength 530 nm and emission wavelength 590 nm as reported in order to evaluate the inhibition rate of the candidate compounds. Inhibitory effects of compound **27** toward MAO-A and MAO-B were evaluated with enzyme from Sigma and a commercialized kit from Promega.

### **1.2 Cell viability analysis**

The human gastric carcinoma cell lines MGC-803 were supplied by the Cell Bank of Shanghai Institute of Cell Biology, Chinese Academy of Sciences. Exponentially growing cells were seeded at  $5 \times 10^3$  cells per well into 96-well plates. After 24 h incubation at 37 °C, the culture medium was removed and replaced with fresh medium containing the candidate compounds in different concentrations. The cells were incubated for another 5 days. Then, 20  $\mu$ L of 3-(4,5-dimethylthiazol-2-yl)-2,5-diphenyltetrazolium bromide (MTT) solution (5 mg/mL) was added to each well and incubated for 4 h at 37 °C. The medium containing MTT was discarded, then 150  $\mu$ L of dimethyl sulfoxide (DMSO) was added to each well and the plates agitated until the dark blue crystals (formazan) had completely dissolved. The absorbance was measured using a microplate reader at a wavelength of 570 nm. Each concentration was analyzed in triplicate and the experiment was repeated three times.

### **1.3 Reversibility analysis**

The dilution assay was done as published.<sup>2</sup> Briefly, an amount of 2.5  $\mu$ g of LSD1 recombinant was incubated with 312.5  $\mu$ M compound **27**, 600  $\mu$ M GSK2879552, or DMSO. At 1 h later, 1.25  $\mu$ g aliquots were removed from all samples and diluted into

HRP-assay solution containing substrate and coupling reagents to a final volume of 100  $\mu$ L. This represents an 80-fold dilution of the inhibitor concentration, which is expected to yield the same inhibition rate for an irreversible inhibitor or significant difference for a reversible inhibitor.

#### **1.4 Western blot**

MGC-803 cells were treated with indicated concentrations of compound **27**, the cells were collected, lysed in RIPA buffer containing a protease inhibitor cocktail for 30 min, followed by centrifugation at 12,000 rpm for 10 min at 4 °C. After the collection of supernatant, the protein concentration was detected using a bicinchoninic acid assay kit (Beyotmie Biotechnology, Haimen, China). After addition with loading buffer, cell lysates were boiled for 10 min at 100 °C for SDS-polyacrylamide gel electrophoresis (PAGE). Proteins were transferred to nitrocellulose (NC) membranes. Then the membranes were blocked with 5% skim milk at room temperature for 2 h, and then incubated overnight at 4 °C with primary antibodies. After washing the membrane with the secondary antibody (1:5000) at room temperature for 2 h, the blots were washed with PBS containing 0.05% Tween-20 (PBST). The antibody-reactive bands were revealed by enhanced chemiluminescence (ECL) and exposed on Kodak radiographic film.

Antibodies used were against histone H3K4me1 (Abcam no. ab176877), H3K4me2 (Abcam no. ab32356), H3K4me3 (Abcam no. ab8580), H3K9me1 (Abcam no. ab9045), H3K9me2 (Abcam no. ab1220), E-Cadherin (Cell Signaling no. 3195S), N-Cadherin (Cell Signaling no. 13116S), and GAPDH (GoodHere no. AB-M-M 001).

#### **1.5 Transwell**

For the migration assay, MGC-803 cells were seeded into Corning® Costar® Transwell® cell culture chamber with porous membrane (8.0  $\mu$ M pore size). The upper chamber was placed into a 24-well plate (lower chamber). 100  $\mu$ L medium containing 1% FBS, different concentrations of compound **27** and 10,000 cells were added to each upper chamber. In the lower chamber, 500  $\mu$ L medium with 20% FBS was used as chemoattractant. After incubation for 24 h, both chambers were washed by PBS for three times. Non-migrated cells were removed from the upper surface of

the membrane by scrubbing with cotton tipped swab, and the migrated cells were fixed with methanol for 15 min. Then the chambers were stained with Hoechst 33258 (10 µg/mL) for 15 min, migrated cells were detected and numbered using high content screening system (ArrayScan XTI, Thermo Fisher Scientific, MA).

## 2. Molecular docking

The Molecular Operating Environment (MOE, Version 2015) was used for docking studies. The crystal structure of LSD1 in complex with an H3K4 peptide (PDB code 2V1D) was downloaded from PDB database and prepared using the default parameters. Hydrogen atoms and the partial charges for all atoms were added by using the protonate 3D module, the H3K4 peptide ligand and all water molecules were deleted, FAD was retained in the protein structure for docking, and the protein was energy-minimized using Amber 10 : EHT forcefield. The docking site was generated using MOE-site Finder. The 3D structures of compounds **18** and **20** were built and energy-minimized using Amber 10 : EHT forcefield. The default Triangle Matcher placement method was used for docking. GBVI/WSA dGscoring function which estimates the free energy of binding of the ligand from a given pose was used to rank the final poses.

## 3. Chemistry

### *General*

Reagents and solvents were purchased from commercial sources and were used without further purification. All reactions were monitored by thin-layer chromatography and visualized with UV light. Melting points were determined on an X-5 micromelting apparatus and are uncorrected. <sup>1</sup>H NMR and <sup>13</sup>C NMR spectra were recorded on a Bruker 400 MHz and 100 MHz spectrometer respectively. High resolution mass spectra (HRMS) were recorded on a Waters Micromass Q-T of Micromass spectrometer by electrospray ionization (ESI). Final products were of >95% purity as analyzed by HPLC analysis (Phenomenex column, C-18, 5.0 µm, 4.6 mm × 150 mm) on Dionex UltiMate 3000 UHPLC instrument from ThermoFisher. The signal was monitored at 254 nm with a UV detector. A flow rate of 1.0 mL/min was used with a mobile phase of methanol in H<sub>2</sub>O (80:20, v/v). The intermediates **1a-c** and

**1f-h** were previously reported.<sup>3</sup>

**General procedure for the synthesis of intermediates 1d and 1e**

**7-Chloro-3-cyclopentyl-5-(propylthio)-3H-[1,2,3]triazolo[4,5-d]pyrimidine (1d)**

The intermediate **1d** was prepared following our previously reported procedure.<sup>3</sup> The mixture of 4,6-dichloro-2-(propylthio)pyrimidin-5-amine (1 eq), cyclopentylamine (1 eq) and triethylamine (1.2 eq) in N,N-dimethylformamide was heated to 100 °C for 20 h and monitored by TLC (PE/EA = 5:1). After completion of the reaction, the mixture was cooled to room temperature and acetic acid (1/2 volume of DMF) was added. The mixture was cooled in an ice bath and sodium nitrite (1 eq in small amount of water) was added dropwise to keep the reaction temperature below 15 °C. After the addition, the reaction mixture was stirred for 30 min at 10~15 °C. TLC indicated completion of the reaction. The solution was diluted with double volume of ethyl acetate and washed with water for 3 times, then neutralized with saturated sodium bicarbonate. The organic layer was concentrated under reduced pressure to give the crude product **1d**, which was used to the next step without further purification. Small amount of the crude product was purified by flash column chromatography for structure identification. Yellow waxy solid. <sup>1</sup>HNMR (400 MHz, Chloroform-*d*, ppm):  $\delta$  5.26-5.33 (m, 1H), 3.19-3.23 (m, 2H), 2.28-2.33 (m, 4H), 2.03-2.08 (m, 2H), 1.78-1.87 (m, 4H), 1.07-1.11 (t,  $J = 7.4$  Hz, 3H). HR-MS (ESI): Calcd. C<sub>12</sub>H<sub>16</sub>ClN<sub>5</sub>S, [M+Na]<sup>+</sup> m/z: 320.0713, found: 320.0712.

**7-Chloro-3-isobutyl-5-(propylthio)-3H-[1,2,3]triazolo[4,5-d]pyrimidine (1e)**

The intermediate **1e** was prepared from isobutylamine and 4,6-dichloro-2-(propylthio)pyrimidin-5-amine using a procedure similar to the synthesis of **1d**. Yellow oil. <sup>1</sup>HNMR (400 MHz, Chloroform-*d*, ppm):  $\delta$  4.42-4.44 (d,  $J = 7.2$  Hz, 2H), 3.19-3.22 (t,  $J = 7.2$  Hz, 2H), 2.39-2.47 (m, 1H), 1.77-1.85 (m, 2H), 1.07-1.11 (t,  $J = 7.2$  Hz, 3H), 0.98-1.00 (d,  $J = 6.4$  Hz, 6H). HR-MS (ESI): Calcd. C<sub>11</sub>H<sub>16</sub>ClN<sub>5</sub>S, [M+Na]<sup>+</sup> m/z: 308.0713, found: 308.0715.

**General procedure for the synthesis of compounds 3-27**

**2-(7-((4-Chlorophenyl)amino)-5-(propylthio)-3H-[1,2,3]triazolo[4,5-d]pyrimidin-3-yl)ethan-1-ol (3)**

The mixture of **1b** (100 mg, 1 eq), 4-chloroaniline (47 mg, 1 eq) and triethylamine (45 mg, 1.2 eq) in 20 ml of ethanol was refluxed overtime and monitored by TLC (PE/EA, 1:1). After completion of the reaction, the mixture was concentrated under reduced pressure. The residue was dissolved in ethyl acetate and washed with water successively. The pure product was obtained by flash column chromatography on silica gel using PE/EA (1:1) to afford compound **3** (83 mg, yield 62%) as a white solid. Mp 156~157 °C. <sup>1</sup>HNMR (400 MHz, DMSO-*d*<sub>6</sub>, ppm): δ 11.01 (s, 1H), 7.92-7.94 (d, *J* = 8.8 Hz, 2H), 7.44-7.46 (d, *J* = 8.8 Hz, 2H), 4.97-5.00 (t, *J* = 5.8 Hz, 1H), 4.55-4.58 (t, *J* = 5.4 Hz, 2H), 3.91-3.95 (q, 2H), 3.09-3.13 (t, *J* = 7.2 Hz, 2H), 1.68-1.74 (m, 2H), 0.96-1.00 (t, *J* = 7.2 Hz, 3H). <sup>13</sup>CNMR (100 MHz, DMSO-*d*<sub>6</sub>, ppm): δ 169.70, 151.41, 150.48, 137.84, 128.92, 128.25, 123.70, 123.39, 59.27, 49.72, 32.94, 22.96, 13.76. HR-MS (ESI): Calcd. C<sub>15</sub>H<sub>17</sub>ClN<sub>6</sub>OS, [M+H]<sup>+</sup> m/z: 365.0951, found: 365.0953.

**2-(7-((4-Bromophenyl)amino)-5-(propylthio)-3H-[1,2,3]triazolo[4,5-d]pyrimidin-3-yl)ethan-1-ol (4)**

Compound **4** was prepared from **1b** (100 mg, 1 eq), 4-bromoaniline (63 mg, 1 eq) and triethylamine (45 mg, 1.2 eq) according to the procedure described above for the synthesis of compound **3** to afford compound **4** (75 mg, yield 50%) as a yellow solid. Mp 149~151 °C. <sup>1</sup>HNMR (400 MHz, DMSO-*d*<sub>6</sub>, ppm): δ 11.00(s,1H), 7.87-7.89 (d, *J* = 8.8 Hz, 2H), 7.57-7.60 (m, 2H), 4.55-4.58 (t, *J* = 5.6 Hz, 2H), 3.91-3.94 (t, *J* = 5.6 Hz, 2H), 3.09-3.13 (t, *J* = 7.1 Hz, 2H), 1.68-1.74 (m, 2H), 0.96-1.00 (t, *J* = 7.4 Hz, 3H). <sup>13</sup>CNMR (100 MHz, DMSO-*d*<sub>6</sub>, ppm): δ 169.70, 151.39, 150.49, 138.27, 131.83, 124.06, 123.41, 116.37, 59.27, 49.72, 32.94, 22.96, 13.76. HR-MS (ESI): Calcd. C<sub>15</sub>H<sub>17</sub>BrN<sub>6</sub>OS, [M+H]<sup>+</sup> m/z: 409.0446, found: 409.0444.

**2-(7-((4-Fluorophenyl)amino)-5-(propylthio)-3H-[1,2,3]triazolo[4,5-d]pyrimidin-3-yl)ethan-1-ol (5)**

Compound **5** was prepared from **1b** (100 mg, 1 eq), 4-fluoroaniline (41 mg, 1 eq) and triethylamine (45 mg, 1.2 eq) according to the procedure described above for the synthesis of compound **3** to afford compound **5** (67 mg, yield 53%) as a light yellow

solid. Mp 140~141 °C. <sup>1</sup>HNMR (400 MHz, DMSO-*d*<sub>6</sub>, ppm): δ 10.92 (s, 1H), 7.87-7.90 (m, 2H), 7.23-7.27 (m, 2H), 4.98-5.00 (t, *J* = 5.6 Hz, 2H), 4.54-4.57 (t, *J* = 5.6 Hz, 2H), 3.91-3.95 (q, 2H), 3.08-3.11 (t, *J* = 7.0 Hz, 2H), 1.65-1.74 (m, 2H), 0.95-0.99 (t, *J* = 7.4 Hz, 3H). <sup>13</sup>CNMR (100 MHz, DMSO-*d*<sub>6</sub>, ppm): δ 169.68, 151.53, 150.44, 135.10, 124.25, 123.30, 115.78, 115.57, 59.27, 49.68, 32.91, 23.01, 13.75. HR-MS (ESI): Calcd. C<sub>15</sub>H<sub>17</sub>FN<sub>6</sub>OS, [M+Na]<sup>+</sup> *m/z*: 371.1066, found: 371.1072.

**2-(5-(Propylthio)-7-((3,4,5-trimethoxyphenyl)amino)-3H-[1,2,3]triazolo[4,5-d]pyrimidin-3-yl)ethan-1-ol (6)**

Compound **6** was prepared from **1b** (100 mg, 1 eq), 3,4,5-trimethoxyaniline (67 mg, 1 eq) and triethylamine (45 mg, 1.2 eq) according to the procedure described above for the synthesis of compound **3** to afford compound **6** (110 mg, yield 72%) as a white solid. Mp 163~165 °C. <sup>1</sup>HNMR (400 MHz, Chloroform-*d*, ppm): δ 8.34 (s, 1H), 7.13 (s, 2H), 4.72-4.75 (t, *J* = 4.8 Hz, 2H), 4.38-4.42 (t, *J* = 6.8 Hz, 1H), 4.25-4.27 (q, 2H), 3.90 (s, 6H), 3.85 (s, 3H), 3.08-3.12 (t, *J* = 7.2 Hz, 2H), 1.73-1.78 (q, 2H), 1.03-1.06 (t, *J* = 7.2 Hz, 3H). <sup>13</sup>CNMR (100 MHz, Chloroform-*d*, ppm): δ 171.52, 153.24, 150.62, 149.64, 134.89, 133.58, 123.33, 98.59, 61.00, 60.70, 56.18, 50.94, 33.24, 22.30, 13.50. HR-MS (ESI): Calcd. C<sub>18</sub>H<sub>24</sub>N<sub>6</sub>O<sub>4</sub>S, [M+Na]<sup>+</sup> *m/z*: 443.1477, found: 443.1479.

**2-(7-(Benzylamino)-5-(propylthio)-3H-[1,2,3]triazolo[4,5-d]pyrimidin-3-yl)ethan-1-ol (7)**

Compound **7** was prepared from **1b** (100 mg, 1 eq), benzylamine (40 mg, 1 eq) and triethylamine (45 mg, 1.2 eq) according to the procedure described above for the synthesis of compound **3** to afford compound **7** (98 mg, yield 78%) as a white solid. Mp 139~140 °C. <sup>1</sup>HNMR (400 MHz, Chloroform-*d*, ppm): δ 7.31-7.41 (m, 5H), 7.14-7.15 (m, 1H), 4.88-4.90 (d, *J* = 6 Hz, 2H), 4.68-4.70 (t, *J* = 4.6 Hz, 2H), 4.45 (m, 1H), 4.16 (m, 2H), 3.10-3.13 (t, *J* = 7.4 Hz, 2H), 1.73-1.82 (m, 2H), 1.03-1.07 (t, *J* = 7.2 Hz, 3H). <sup>13</sup>CNMR (100 MHz, Chloroform-*d*, ppm): δ 171.42, 153.23, 149.55, 137.44, 128.79, 127.89, 127.79, 123.30, 60.85, 51.17, 44.68, 33.36, 22.71, 13.51. HR-MS (ESI): Calcd. C<sub>16</sub>H<sub>20</sub>N<sub>6</sub>OS, [M+Na]<sup>+</sup> *m/z*: 367.1317, found: 367.1319.

**2-(7-((4-Methylbenzyl)amino)-5-(propylthio)-3H-[1,2,3]triazolo[4,5-d]pyrimidin-**

### **3-yl)ethan-1-ol (8)**

Compound **8** was prepared from **1b** (100 mg, 1 eq), 4-methylbenzylamine (44 mg, 1 eq) and triethylamine (45 mg, 1.2 eq) according to the procedure described above for the synthesis of compound **3** to afford compound **8** (88 mg, yield 67%) as a white solid. Mp 154~155 °C. <sup>1</sup>HNMR (400 MHz, Chloroform-*d*, ppm): δ 7.28-7.30 (d, *J* = 8.0 Hz, 2H), 7.16-7.18 (d, *J* = 7.9 Hz, 2H), 4.83-4.85 (d, *J* = 5.6 Hz, 2H), 4.68-4.70 (t, *J* = 4.6 Hz, 2H), 4.47-4.50 (t, *J* = 6.4 Hz, 1H), 4.14-4.17 (m, 2H), 3.121-3.14 (t, *J* = 7.2 Hz, 2H), 2.36 (s, 3H), 1.79-1.82 (m, 2H), 1.06 (t, *J* = 7.4 Hz, 3H). <sup>13</sup>CNMR (100 MHz, Chloroform-*d*, ppm): δ 171.39, 153.18, 149.51, 137.55, 134.37, 129.44, 127.94, 123.31, 60.85, 51.21, 44.46, 33.36, 22.72, 21.14, 13.52. HR-MS (ESI): Calcd. C<sub>17</sub>H<sub>22</sub>N<sub>6</sub>OS, [M+Na]<sup>+</sup> *m/z*: 381.1473, found: 381.1475.

### **2-(7-((4-Methoxybenzyl)amino)-5-(propylthio)-3H-[1,2,3]triazolo[4,5-d]pyrimidin-3-yl)ethan-1-ol (9)**

Compound **9** was prepared from **1b** (100 mg, 1 eq), 4-methoxybenzylamine (50 mg, 1 eq) and triethylamine (45 mg, 1.2 eq) according to the procedure described above for the synthesis of compound **3** to afford compound **9** (110 mg, yield 81%) as a white solid. Mp 148~149 °C. <sup>1</sup>HNMR (400 MHz, DMSO-*d*<sub>6</sub>, ppm): δ 9.45-9.48 (t, *J* = 6 Hz, 1H), 7.27-7.29 (d, *J* = 8.8 Hz, 2H), 6.88-6.90 (d, *J* = 8.8 Hz, 2H), 4.94-4.97 (t, *J* = 5.8 Hz, 1H), 4.64-4.66 (d, *J* = 6.0 Hz, 2H), 4.48-4.50 (t, *J* = 5.4 Hz, 2H), 3.86-3.91 (q, 2H), 3.72 (s, 3H), 3.04-3.07 (t, *J* = 7.2 Hz, 2H), 1.61-1.72 (m, 2H), 0.92-0.96 (t, *J* = 7.4 Hz, 3H). <sup>13</sup>CNMR (100 MHz, DMSO-*d*<sub>6</sub>, ppm): δ 169.59, 158.74, 153.42, 150.05, 131.35, 129.04, 123.22, 114.28, 114.18, 59.28, 55.51, 49.52, 43.11, 32.90, 23.08, 13.78. HR-MS (ESI): Calcd. C<sub>17</sub>H<sub>22</sub>N<sub>6</sub>O<sub>2</sub>S, [M+H]<sup>+</sup> *m/z*: 375.1603, found: 375.1608.

### **4-(((3-(2-Hydroxyethyl)-5-(propylthio)-3H-[1,2,3]triazolo[4,5-d]pyrimidin-7-yl)amino)methyl)phenol (10)**

Compound **10** was prepared from **1b** (100 mg, 1 eq), 4-hydroxybenzylamine (45 mg, 1 eq) and triethylamine (45 mg, 1.2 eq) according to the procedure described above for the synthesis of compound **3** to afford compound **10** (99 mg, yield 75%) as a white solid. Mp 198~199 °C. <sup>1</sup>HNMR (400 MHz, DMSO-*d*<sub>6</sub>, ppm): δ 9.40-9.43 (t, *J* = 6.0 Hz, 1H), 9.31 (s, 1H), 7.15-7.17 (d, *J* = 8.4 Hz, 2H), 6.70-6.72 (d, *J* = 8.4 Hz,



2H), 4.94-4.97 (t,  $J = 5.8$  Hz, 1H), 4.60-4.62 (d,  $J = 6$  Hz, 2H), 4.48-4.50 (d,  $J = 5.4$  Hz, 2H), 3.86-3.91 (m, 2H), 3.05-3.08 (t,  $J = 7.2$  Hz, 2H), 1.62-1.70 (m, 2H), 0.93-0.97 (t,  $J = 7.4$  Hz, 3H).  $^{13}\text{C}$ NMR (100 MHz, DMSO- $d_6$ , ppm):  $\delta$  169.58, 156.81, 153.40, 150.04, 129.57, 129.08, 123.21, 115.50, 59.29, 49.51, 43.20, 32.90, 23.09, 13.78. HR-MS (ESI): Calcd.  $\text{C}_{16}\text{H}_{20}\text{N}_6\text{O}_2\text{S}$ ,  $[\text{M}+\text{H}]^+$   $m/z$ : 361.1447, found: 361.1448.

**2-(7-(4-Benzylpiperazin-1-yl)-5-(propylthio)-3H-[1,2,3]triazolo[4,5-d]pyrimidin-3-yl)ethan-1-ol (11)**

Compound **11** was prepared from **1b** (100 mg, 1 eq), benzylpiperazine (65 mg, 1 eq) and triethylamine (45 mg, 1.2 eq) according to the procedure described above for the synthesis of compound **3** to afford compound **11** (116 mg, yield 77%) as a yellow solid. Mp 115~116 °C.  $^1\text{H}$ NMR (400 MHz, Chloroform- $d$ , ppm):  $\delta$  7.36-7.37(m, 4H), 7.31-7.33 (m, 1H), 4.70-4.72 (t,  $J = 4.6$  Hz, 2H), 4.66 (m, 2H), 4.51 (br, 1H), 4.09-4.15 (m, 4H), 3.60 (s, 2H), 3.07-3.11 (t,  $J = 7.2$  Hz, 2H), 2.58-2.67 (m, 4H), 1.76-1.81 (m, 2H), 1.05-1.08 (t,  $J = 7.4$  Hz, 3H).  $^{13}\text{C}$ NMR (100 MHz, Chloroform- $d$ , ppm):  $\delta$  170.07, 152.29, 150.86, 137.48, 129.20, 128.39, 127.37, 123.85, 62.93, 61.10, 53.23, 52.67, 51.28, 47.35, 43.69, 33.21, 22.69, 13.51. HR-MS (ESI): Calcd.  $\text{C}_{20}\text{H}_{27}\text{N}_7\text{OS}$ ,  $[\text{M}+\text{H}]^+$   $m/z$ : 414.2076, found: 414.2078.

**3-Benzyl-7-(4-benzylpiperazin-1-yl)-5-(prop-2-yn-1-ylthio)-3H-[1,2,3]triazolo[4,5-d]pyrimidine (12)**

Compound **12** was prepared from **1c** (100 mg, 1 eq), benzylpiperazine (56 mg, 1 eq) and triethylamine (39 mg, 1.2 eq) according to the procedure described above for the synthesis of compound **3** to afford compound **12** (85 mg, yield 77%) as a yellow solid. Mp 103~104 °C.  $^1\text{H}$ NMR (400 MHz, Chloroform- $d$ , ppm):  $\delta$  7.43-7.45 (m, 2H), 7.32-7.34 (m, 4H), 7.28-7.30 (m, 4H), 5.65 (s, 2H), 4.64 (s, 2H), 4.06 (s, 2H), 3.89-3.90 (d,  $J = 2.4$  Hz, 2H), 3.56 (s, 2H), 2.55-2.62 (m, 4H), 2.16 (t,  $J = 2.6$  Hz, 1H).  $^{13}\text{C}$ NMR (100 MHz, Chloroform- $d$ , ppm):  $\delta$  167.84, 152.49, 150.76, 137.48, 135.06, 129.18, 128.75, 128.54, 128.35, 128.31, 127.32, 123.82, 80.22, 70.15, 62.91, 53.19, 52.70, 50.16, 47.27, 43.70, 19.73. HR-MS (ESI): Calcd.  $\text{C}_{25}\text{H}_{25}\text{N}_7\text{S}$ ,  $[\text{M}+\text{H}]^+$   $m/z$ : 456.1970, found: 456.1971.

**Tert-butyl4-(3-benzyl-5-(prop-2-yn-1-ylthio)-3H-[1,2,3]triazolo[4,5-d]pyrimidin-**

### **7-yl)piperazine-1-carboxylate (13)**

Compound **13** was prepared from **1c** (100 mg, 1 eq), 1-boc-piperazine (59 mg, 1 eq) and triethylamine (39 mg, 1.2 eq) according to the procedure described above for the synthesis of compound **3** to afford compound **13** (121 mg, yield 82%) as a yellow solid. Mp 128~129 °C. <sup>1</sup>HNMR (400 MHz, Chloroform-*d*, ppm): δ 7.44-7.46 (m, 2H), 7.29-7.34 (m, 3H), 5.67 (s, 1H), 4.61 (s, 2H), 4.04 (s, 2H), 3.90-3.91 (d, *J* = 2.8 Hz, 2H), 3.56-3.60 (m, 4H), 2.17-2.18 (t, *J* = 2.8 Hz, 1H), 1.49 (s, 9H). <sup>13</sup>CNMR (100 MHz, Chloroform-*d*, ppm): δ 168.00, 154.58, 152.69, 150.81, 134.95, 128.78, 128.58, 128.38, 123.79, 80.41, 80.15, 70.21, 50.26, 47.13, 43.52, 28.40, 19.78. HR-MS (ESI): Calcd. C<sub>23</sub>H<sub>27</sub>N<sub>7</sub>O<sub>2</sub>S, [M+H]<sup>+</sup> m/z: 466.2025, found: 466.2026.

### **2-(7-(3-Chlorophenoxy)-5-(propylthio)-3H-[1,2,3]triazolo[4,5-d]pyrimidin-3-yl)ethan-1-ol (14)**

The mixture of **1b** (100 mg, 1 eq), 3-chlorophenol (47 mg, 1 eq) and K<sub>2</sub>CO<sub>3</sub> (60 mg, 1.2 eq) in 20 ml of ethanol was refluxed for 3 h and monitored by TLC (PE/EA, 1:1). After completion of the reaction, the reaction mixture was concentrated under reduced pressure. The residue was dissolved in ethyl acetate and washed with water successively. The pure product was obtained by flash column chromatography on silica gel using PE/EA (1:1) to afford compound **14** (114 mg, yield 85%) as a white solid. Mp 143~144 °C. <sup>1</sup>HNMR (400 MHz, Chloroform-*d*, ppm): δ 7.38-7.42 (t, *J* = 8.0 Hz, 1H), 7.31-7.33 (m, 2H), 7.18-7.21 (m, 1H), 4.77-4.80 (t, *J* = 4.8 Hz, 2H), 4.19-4.23 (m, 2H), 3.20-3.23 (t, *J* = 6.6 Hz, 1H), 2.89-2.93 (t, *J* = 7.4 Hz, 1H), 1.58-1.63 (m, 2H), 0.88-0.92 (t, *J* = 7.4 Hz, 3H). <sup>13</sup>CNMR (100 MHz, Chloroform-*d*, ppm): δ 171.57, 159.37, 152.75, 152.03, 134.84, 130.35, 126.65, 123.62, 122.57, 120.22, 60.78, 50.69, 33.62, 22.67, 13.30. HR-MS (ESI): Calcd. C<sub>15</sub>H<sub>16</sub>ClN<sub>5</sub>O<sub>2</sub>S, [M+Na]<sup>+</sup> m/z: 388.0611, found: 388.0612.

### **2-(7-(4-Chlorophenoxy)-5-(propylthio)-3H-[1,2,3]triazolo[4,5-d]pyrimidin-3-yl)ethan-1-ol (15)**

Compound **15** was prepared from **1b** (100 mg, 1 eq), 4-chlorophenol (47 mg, 1 eq) and K<sub>2</sub>CO<sub>3</sub> (60 mg, 1.2 eq) according to the procedure described above for the synthesis of compound **14** to afford compound **15** (106 mg, yield 79%) as a white

solid. Mp 153~155 °C. <sup>1</sup>HNMR (400 MHz, DMSO-*d*<sub>6</sub>, ppm): δ 7.59-7.61 (d, *J* = 8.8 Hz, 2H), 7.45-7.48 (d, *J* = 8.8 Hz, 2H), 4.97-4.50 (t, *J* = 5.8 Hz, 1H), 4.64-4.66 (t, *J* = 5.4 Hz, 2H), 3.92-3.96 (m, 2H), 2.89-2.93 (t, *J* = 7.2 Hz, 1H), 1.51-1.57 (m, 2H), 0.80-0.84 (t, *J* = 7.2 Hz, 3H). <sup>13</sup>CNMR (100 MHz, DMSO-*d*<sub>6</sub>, ppm): δ 169.26, 159.20, 152.64, 150.17, 130.56, 129.69, 123.90, 123.07, 58.79, 49.67, 32.67, 22.38, 13.08. HR-MS (ESI): Calcd. C<sub>15</sub>H<sub>16</sub>ClN<sub>5</sub>O<sub>2</sub>S, [M+Na]<sup>+</sup> m/z: 388.0611, found: 388.0612.

**2-(7-(Naphthalen-1-yloxy)-5-(propylthio)-3H-[1,2,3]triazolo[4,5-d]pyrimidin-3-yl)ethan-1-ol (16)**

Compound **16** was prepared from **1b** (100 mg, 1 eq), 1-naphthol (53 mg, 1 eq) and K<sub>2</sub>CO<sub>3</sub> (60 mg, 1.2 eq) according to the procedure described above for the synthesis of compound **14** to afford compound **16** (94 mg, yield 67%) as a white solid. Mp 124~125 °C. <sup>1</sup>HNMR (400 MHz, Chloroform-*d*, ppm): δ 7.83-7.93 (m, 3H), 7.51-7.56 (m, 2H), 7.44-7.48 (m, 1H), 7.39-7.41 (d, *J* = 7.2 Hz, 1H), 4.79-4.81 (t, *J* = 5.0 Hz, 2H), 4.20-4.24 (m, 2H), 3.31-3.34 (t, *J* = 6.4 Hz, 1H), 2.55-2.59 (t, *J* = 7.4 Hz, 2H), 1.19-1.28 (m, 2H), 0.56-0.60 (t, *J* = 7.4 Hz, 3H). <sup>13</sup>CNMR (100 MHz, Chloroform-*d*, ppm): δ 171.66, 160.28, 152.85, 147.89, 134.79, 128.05, 126.89, 126.68, 126.64, 126.58, 125.38, 123.71, 121.51, 118.22, 60.84, 50.73, 33.47, 22.60, 13.09. HR-MS (ESI): Calcd. C<sub>19</sub>H<sub>19</sub>N<sub>5</sub>O<sub>2</sub>S, [M+Na]<sup>+</sup> m/z: 404.1157, found: 404.1155.

**2-(7-(naphthalen-2-yloxy)-5-(propylthio)-3H-[1,2,3]triazolo[4,5-d]pyrimidin-3-yl)ethan-1-ol (17)**

Compound **17** was prepared from **1b** (100 mg, 1 eq), 2-naphthol (53 mg, 1 eq) and K<sub>2</sub>CO<sub>3</sub> (60 mg, 1.2 eq) according to the procedure described above for the synthesis of compound **14** to afford compound **17** (102 mg, yield 73%) as a white solid. Mp 127~128 °C. <sup>1</sup>HNMR (400 MHz, Chloroform-*d*, ppm): δ 7.89-7.94 (m, 2H), 7.84-7.86 (m, 1H), 7.73-7.74 (d, *J* = 2.0 Hz, 1H), 7.52-7.54 (m, 2H), 7.39-7.42 (m, 1H), 4.79-4.81 (t, *J* = 4.8 Hz, 2H), 4.20-4.24 (m, 2H), 3.33-3.36 (t, *J* = 6.5 Hz, 1H), 2.79-2.83 (t, *J* = 7.4 Hz, 2H), 1.47-1.53 (m, 2H), 0.66-0.70 (t, *J* = 7.4 Hz, 3H). <sup>13</sup>CNMR (100 MHz, Chloroform-*d*, ppm): δ 171.62, 159.97, 152.67, 149.35, 133.81, 131.70, 129.51, 127.86, 127.75, 126.76, 126.04, 123.87, 121.22, 118.80, 60.83, 50.76,

33.54, 22.67, 13.11. HR-MS (ESI): Calcd. C<sub>19</sub>H<sub>19</sub>N<sub>5</sub>O<sub>2</sub>S, [M+Na]<sup>+</sup> m/z: 404.1157, found: 404.1155.

**2-(5-(Propylthio)-7-(p-tolylthio)-3H-[1,2,3]triazolo[4,5-d]pyrimidin-3-yl)ethan-1-ol (18)**

Compound **18** was prepared from **1b** (100 mg, 1 eq), 4-toluenethiol (45 mg, 1 eq) and triethylamine (45 mg, 1.2 eq) according to the procedure described above for the synthesis of compound **3** to afford compound **18** (95 mg, yield 72%) as a orange solid. Mp 107~108 °C. <sup>1</sup>HNMR (400 MHz, Chloroform-*d*, ppm): δ 7.50-7.52 (d, *J* = 8.4 Hz, 2H), 7.27-7.29 (d, *J* = 8.0 Hz, 2H), 4.72-4.74 (t, *J* = 4.8 Hz, 2H), 4.14-4.18 (m, 2H), 3.34-3.37 (t, *J* = 6.6 Hz, 1H), 2.75-2.79 (t, *J* = 7.2 Hz, 2H), 2.43 (s, 3H), 1.43-1.49 (m, 2H), 0.82-0.86 (t, *J* = 7.4 Hz, 3H). <sup>13</sup>CNMR (100 MHz, Chloroform-*d*, ppm): δ 170.34, 165.08, 148.66, 140.43, 135.96, 131.63, 130.15, 122.00, 60.81, 50.58, 33.44, 22.53, 21.43, 13.28. HR-MS (ESI): Calcd. C<sub>16</sub>H<sub>19</sub>N<sub>5</sub>OS<sub>2</sub>, [M+Na]<sup>+</sup> m/z: 384.0929, found: 384.0931.

**2-(7-((4-Chlorophenyl)thio)-5-(propylthio)-3H-[1,2,3]triazolo[4,5-d]pyrimidin-3-yl)ethan-1-ol (19)**

Compound **19** was prepared from **1b** (100 mg, 1 eq), 4-chlorothiophenol (53 mg, 1 eq) and triethylamine (45 mg, 1.2 eq) according to the procedure described above for the synthesis of compound **3** to afford compound **19** (96 mg, yield 69%) as a white solid. Mp 114~115 °C. <sup>1</sup>HNMR (400 MHz, Chloroform-*d*, ppm): δ 7.56-7.58 (d, *J* = 8.4 Hz, 2H), 7.45-7.47 (d, *J* = 8.8 Hz, 2H), 4.73-4.75 (t, *J* = 5.0 Hz, 2H), 4.15-4.19 (m, 2H), 3.18-3.22 (t, *J* = 6.4 Hz, 1H), 2.78-2.82 (t, *J* = 7.4 Hz, 2H), 1.47-1.53 (m, 2H), 0.88-0.91 (t, *J* = 7.2 Hz, 3H). <sup>13</sup>CNMR (100 MHz, Chloroform-*d*, ppm): δ 170.55, 164.02, 148.77, 137.32, 136.73, 131.54, 129.63, 124.05, 60.79, 50.57, 33.50, 22.41, 13.31. HR-MS (ESI): Calcd. C<sub>15</sub>H<sub>16</sub>ClN<sub>5</sub>OS<sub>2</sub>, [M+Na]<sup>+</sup> m/z: 404.0382, found: 404.0381.

**2-(5-(Propylthio)-7-(pyridin-2-ylthio)-3H-[1,2,3]triazolo[4,5-d]pyrimidin-3-yl)ethan-1-ol (20)**

Compound **20** was prepared from **1b** (100 mg, 1 eq), 2-mercaptopyridine (41 mg, 1 eq) and triethylamine (45 mg, 1.2 eq) according to the procedure described above for

the synthesis of compound **3** to afford compound **20** (102 mg, yield 81%) as yellow sticky oil. <sup>1</sup>HNMR (400 MHz, Chloroform-*d*, ppm):  $\delta$  8.68-8.69 (m, 1H), 7.80-7.82 (m, 2H), 7.38-7.42 (m, 1H), 4.71-4.74 (t,  $J = 5.0$  Hz, 2H), 4.16-4.18 (t,  $J = 5.0$  Hz, 2H), 2.84-2.87 (t,  $J = 7.2$  Hz, 2H), 1.52-1.61 (m, 2H), 0.90-0.93 (t,  $J = 7.2$  Hz, 3H). <sup>13</sup>CNMR (100 MHz, Chloroform-*d*, ppm):  $\delta$  170.48, 163.72, 150.80, 150.02, 148.92, 137.34, 131.72, 131.38, 124.17, 60.68, 50.43, 33.42, 22.28, 13.34. HR-MS (ESI): Calcd. C<sub>14</sub>H<sub>16</sub>N<sub>6</sub>OS<sub>2</sub>, [M+H]<sup>+</sup> m/z: 349.0905, found: 349.0902.

**3-(Furan-2-ylmethyl)-5-(propylthio)-7-(pyridin-2-ylthio)-3H-[1,2,3]triazolo[4,5-d]pyrimidine (21)**

Compound **21** was prepared from **1h** (100 mg, 1 eq), 2-mercaptopyridine (36 mg, 1 eq) and triethylamine (45 mg, 1.2 eq) according to the procedure described above for the synthesis of compound **3** to afford compound **21** (103 mg, yield 83%) as yellow semi-solid. <sup>1</sup>HNMR (400 MHz, Chloroform-*d*)  $\delta$  8.68-8.69 (m, 1H), 7.77-7.82 (m, 2H), 7.37-7.40 (m, 1H), 7.35 (m, 1H), 6.45-6.46 (d,  $J = 3.3$  Hz, 1H), 6.33-6.34 (m, 1H), 5.71 (s, 2H), 2.88-2.91 (t,  $J = 7.2$  Hz, 2H), 1.56-1.62 (m, 2H), 0.92-0.95 (t,  $J = 7.4$  Hz, 3H). <sup>13</sup>CNMR (100 MHz, Chloroform-*d*, ppm):  $\delta$  170.54, 163.39, 150.78, 150.15, 148.62, 147.30, 143.26, 137.29, 131.56, 131.28, 124.10, 110.70, 110.07, 43.13, 33.41, 22.37, 13.44. HR-MS (ESI): Calcd. C<sub>17</sub>H<sub>16</sub>N<sub>6</sub>OS<sub>2</sub>, [M+H]<sup>+</sup> m/z: 385.0905, found: 385.0901.

**3-Isobutyl-5-(propylthio)-7-(pyridin-2-ylthio)-3H-[1,2,3]triazolo[4,5-d]pyrimidine (22)**

Compound **22** was prepared from **1e** (100 mg, 1 eq), 2-mercaptopyridine (39 mg, 1 eq) and triethylamine (42 mg, 1.2 eq) according to the procedure described above for the synthesis of compound **3** to afford compound **22** (91 mg, yield 72%) as yellow oil. <sup>1</sup>HNMR (400 MHz, Chloroform-*d*, ppm)  $\delta$  8.69-8.71 (m, 1H), 7.79-7.85 (m, 2H), 7.38-7.42 (m, 1H), 4.36-4.38 (d,  $J = 7.2$  Hz, 2H), 2.85-2.89 (t,  $J = 7.2$  Hz, 2H), 2.38-2.45 (m, 1H), 1.54-1.60 (m, 2H), 0.95-0.96 (d,  $J = 6.8$  Hz, 6H), 0.90-0.94 (t,  $J = 7.4$  Hz, 3H). <sup>13</sup>CNMR (100 MHz, Chloroform-*d*, ppm):  $\delta$  170.03, 163.18, 150.77, 150.18, 148.99, 137.27, 131.50, 131.35, 124.07, 53.94, 33.37, 29.00, 22.41, 19.96, 13.41. HR-MS (ESI): Calcd. C<sub>16</sub>H<sub>20</sub>N<sub>6</sub>S<sub>2</sub>, [M+H]<sup>+</sup> m/z: 361.1269, found: 361.1268.

### **3-Cyclopentyl-5-(propylthio)-7-(pyridin-2-ylthio)-3H-[1,2,3]triazolo[4,5-d]pyrimidine (23)**

Compound **23** was prepared from **1d** (100 mg, 1 eq), 2-mercaptopyridine (37 mg, 1 eq) and triethylamine (41 mg, 1.2 eq) according to the procedure described above for the synthesis of compound **3** to afford compound **23** (86 mg, yield 69%) as yellow sticky oil. <sup>1</sup>H NMR (400 MHz, Chloroform-*d*, ppm) δ 8.68– 8.70 (m, 1H), 7.78-7.84 (m, 2H), 7.37-7.41 (m, 1H), 5.21-5.28 (m, 1H), 2.87-2.91 (t, *J* = 7.2 Hz, 2H), 2.23-2.28 (m, 4H), 2.00-2.04 (m, 2H), 1.75-1.80 (m, 2H), 1.56-1.62 (m, 2H), 0.91-0.95 (t, *J* = 7.4 Hz, 3H). <sup>13</sup>C NMR (100 MHz, Chloroform-*d*, ppm): δ 169.51, 163.12, 150.72, 150.35, 148.43, 137.24, 132.00, 131.23, 124.02, 59.25, 33.37, 32.46, 24.55, 22.43, 13.41. HR-MS (ESI): Calcd. C<sub>17</sub>H<sub>20</sub>N<sub>6</sub>S<sub>2</sub>, [M+H]<sup>+</sup> m/z: 373.1269, found: 373.1271.

### **5-(Propylthio)-7-(pyridin-2-ylthio)-3-(2-(thiophen-2-yl)ethyl)-3H-[1,2,3]triazolo[4,5-d]pyrimidine (24)**

Compound **24** was prepared from **1g** (100 mg, 1 eq), 2-mercaptopyridine (33 mg, 1 eq) and triethylamine (36 mg, 1.2 eq) according to the procedure described above for the synthesis of compound **3** to afford compound **24** (92 mg, yield 75%) as yellow sticky oil. <sup>1</sup>H NMR (400 MHz, Chloroform-*d*, ppm): δ 8.69-8.70 (m, 1H), 7.78-7.84 (m, 2H), 7.38-7.41 (m, 1H), 7.12-7.14 (m, 1H), 6.86-6.89 (m, 1H), 6.76-6.77 (d, *J* = 3.4 Hz, 1H), 4.79-4.83 (t, *J* = 7.3 Hz, 2H), 3.53-3.57 (t, *J* = 7.3 Hz, 2H), 2.84-2.88 (t, *J* = 7.2 Hz, 2H), 1.54-1.59 (m, 2H), 0.91-0.95 (t, *J* = 7.3 Hz, 3H). <sup>13</sup>C NMR (100 MHz, Chloroform-*d*, ppm): δ 170.23, 163.23, 150.75, 150.06, 148.78, 138.64, 137.29, 131.52, 131.34, 127.06, 125.94, 124.48, 124.10, 48.05, 33.36, 29.59, 22.37, 13.44. HR-MS (ESI): Calcd. C<sub>18</sub>H<sub>18</sub>N<sub>6</sub>S<sub>3</sub>, [M+H]<sup>+</sup> m/z: 415.0833, found: 415.0832.

### **3-Benzyl-5-(propylthio)-7-(pyridin-2-ylthio)-3H-[1,2,3]triazolo[4,5-d]pyrimidine (25)**

Compound **25** was prepared from **1b** (100 mg, 1 eq), 2-mercaptopyridine (35 mg, 1 eq) and triethylamine (38 mg, 1.2 eq) according to the procedure described above for the synthesis of compound **3** to afford compound **25** (101 mg, yield 82%) as yellow oil. <sup>1</sup>H NMR (400 MHz, Chloroform-*d*, ppm) δ 8.67-8.68 (m, 1H), 7.76-7.82 (m, 2H),

7.36-7.41 (m, 3H), 7.30-7.34 (m, 3H), 5.71 (s, 2H), 2.87-2.91 (t,  $J = 7.2$  Hz, 2H), 1.55-1.61 (m, 2H), 0.91-0.95 (t,  $J = 7.3$  Hz, 3H).  $^{13}\text{C}$ NMR (100 MHz, Chloroform-*d*, ppm)  $\delta$  170.37, 163.33, 150.74, 150.18, 148.63, 137.26, 134.48, 131.66, 131.21, 128.84, 128.53, 128.41, 124.05, 50.52, 33.37, 22.37, 13.45. HR-MS (ESI): Calcd.  $\text{C}_{19}\text{H}_{18}\text{N}_6\text{S}_2$ ,  $[\text{M}+\text{H}]^+$   $m/z$ : 395.1113, found: 395.1111.

**3-Benzyl-5-(prop-2-yn-1-ylthio)-7-(pyridin-2-ylthio)-3H-[1,2,3]triazolo[4,5-d]pyrimidine (26)**

Compound **26** was prepared from **1c** (100 mg, 1 eq), 2-mercaptopyridine (35 mg, 1 eq) and triethylamine (38 mg, 1.2 eq) according to the procedure described above for the synthesis of compound **3** to afford compound **26** (100 mg, yield 82%) as yellow semi-solid.  $^1\text{H}$ NMR (400 MHz, Chloroform-*d*, ppm)  $\delta$  8.67-8.69 (m, 1H), 7.78-7.84 (m, 2H), 7.38-7.44 (m, 3H), 7.29-7.35 (m, 3H), 5.73 (s, 2H), 3.67 (d,  $J = 2.6$  Hz, 2H), 2.13-2.14 (t,  $J = 2.7$  Hz, 1H).  $^{13}\text{C}$ NMR (100 MHz, Chloroform-*d*, ppm)  $\delta$  168.06, 163.90, 150.80, 149.83, 148.52, 137.37, 134.32, 131.80, 131.37, 128.88, 128.60, 128.53, 124.20, 79.25, 70.76, 50.67, 19.84. HR-MS (ESI): Calcd.  $\text{C}_{19}\text{H}_{14}\text{N}_6\text{S}_2$ ,  $[\text{M}+\text{Na}]^+$   $m/z$ : 413.0619, found: 413.0619.

**3-Benzyl-5-(benzylthio)-7-(pyridin-2-ylthio)-3H-[1,2,3]triazolo[4,5-d]pyrimidine (27)**

Compound **27** was prepared from **1a** (100 mg, 1 eq), 2-mercaptopyridine (30 mg, 1 eq) and triethylamine (33 mg, 1.2 eq) according to the procedure described above for the synthesis of compound **3** to afford compound **27** (102 mg, yield 85%) as a white solid. Mp 114~116 °C.  $^1\text{H}$ NMR (400 MHz, Chloroform-*d*, ppm)  $\delta$  8.62-8.64 (m, 1H), 7.78-7.80 (m, 1H), 7.68-7.73 (m, 1H), 7.36-7.38 (m, 2H), 7.30-7.33 (m, 4H), 7.25-7.26 (m, 5H), 5.72 (s, 2H), 4.20 (s, 2H).  $^{13}\text{C}$ NMR (100 MHz, Chloroform-*d*, ppm)  $\delta$  169.66, 163.64, 150.72, 150.04, 148.59, 137.24, 136.99, 134.44, 131.75, 131.18, 128.90, 128.78, 128.55, 128.50, 128.34, 127.29, 124.10, 50.53, 35.66. HR-MS (ESI): Calcd.  $\text{C}_{23}\text{H}_{18}\text{N}_6\text{S}_2$ ,  $[\text{M}+\text{H}]^+$   $m/z$ : 443.1113, found: 443.1115.

**References**

(1) Zheng, Y. C.; Duan, Y. C.; Ma, J. L.; Xu, R. M.; Zi, X.; Lv, W. L.; Wang, M. M.; Ye, X. W.; Zhu, S.;

Mobley, D.; Zhu, Y. Y.; Wang, J. W.; Li, J. F.; Wang, Z. R.; Zhao, W.; Liu, H. M. Triazole-dithiocarbamate based selective lysine specific demethylase 1 (LSD1) inactivators inhibit gastric cancer cell growth, invasion, and migration. *J Med Chem* 2013, 56, 8543-60.

(2) Willmann, D.; Lim, S.; Wetzel, S.; Metzger, E.; Jandausch, A.; Wilk, W.; Jung, M.; Forne, I.; Imhof, A.; Janzer, A.; Kirfel, J.; Waldmann, H.; Schule, R.; Buettner, R. Impairment of prostate cancer cell growth by a selective and reversible LSD1 inhibitor. *Int. J. Cancer* 2012, 131, 2704-2709.

(3) Li, Z. H.; Yang, D. X.; Geng, P. F.; Zhang, J.; Wei, H. M.; Hu, B.; Guo, Q.; Zhang, X. H.; Guo, W. G.; Zhao, B.; Yu, B.; Ma, L. Y.; Liu, H. M. Design, synthesis and biological evaluation of [1,2,3]triazolo[4,5-d]pyrimidine derivatives possessing a hydrazone moiety as antiproliferative agents. *Eur J Med Chem* 2016, 124, 967-980.

### The NMR spectra of compounds **1d-e** and **3-27**



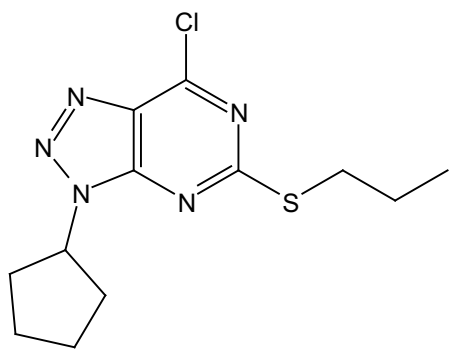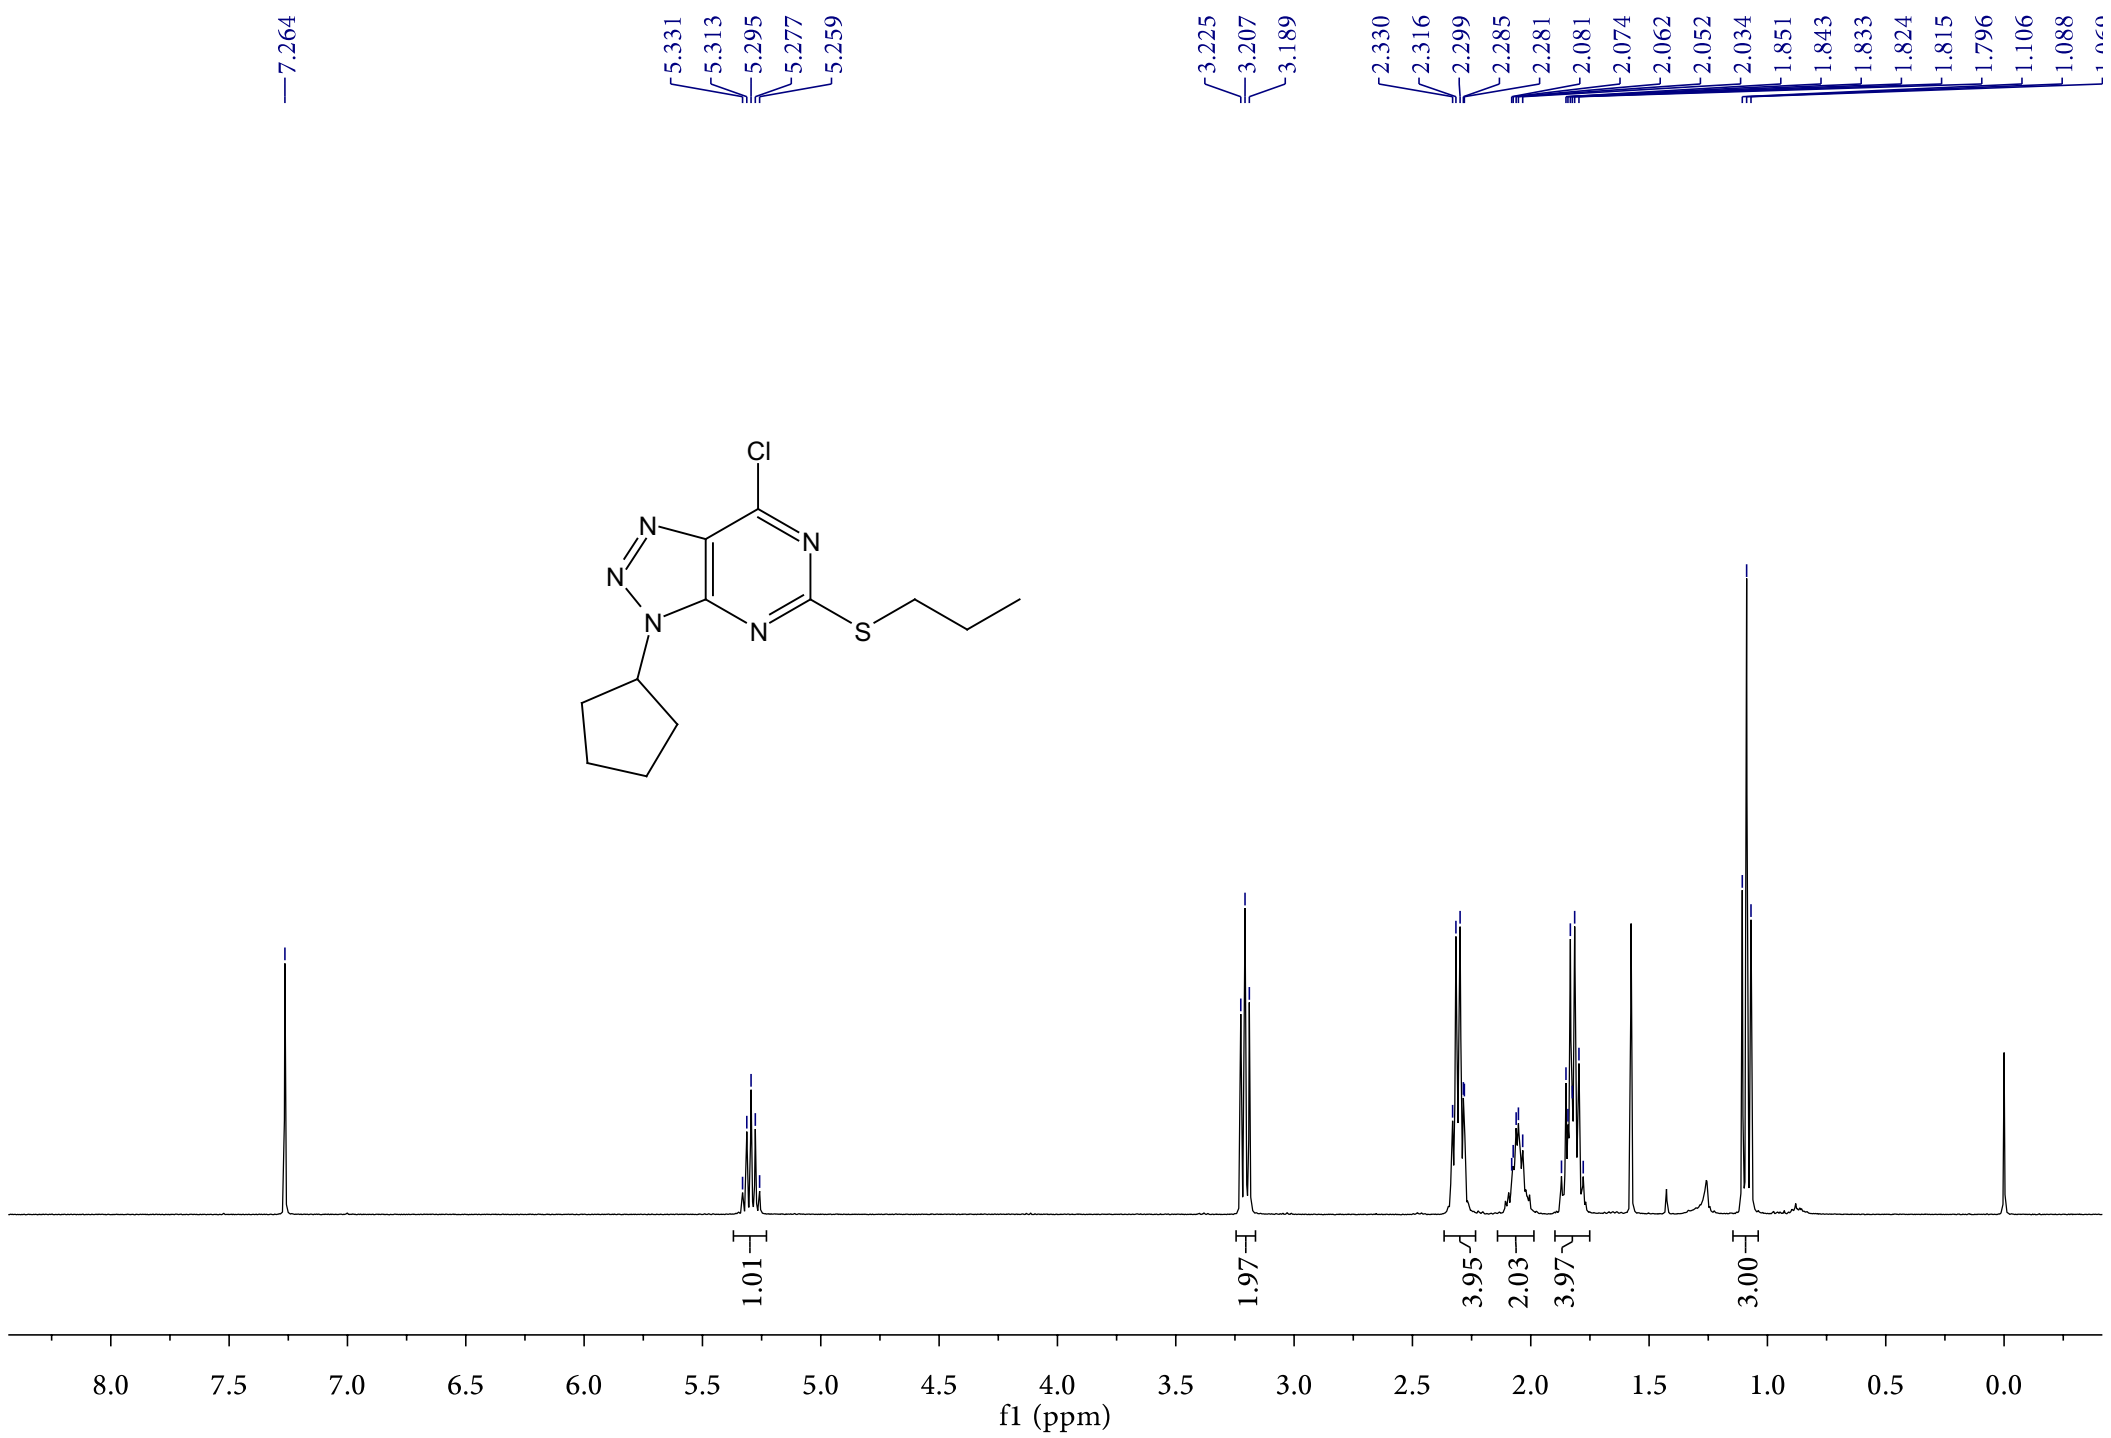

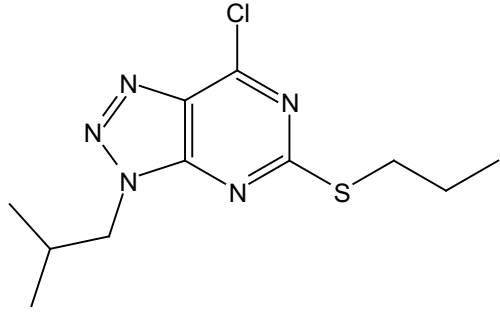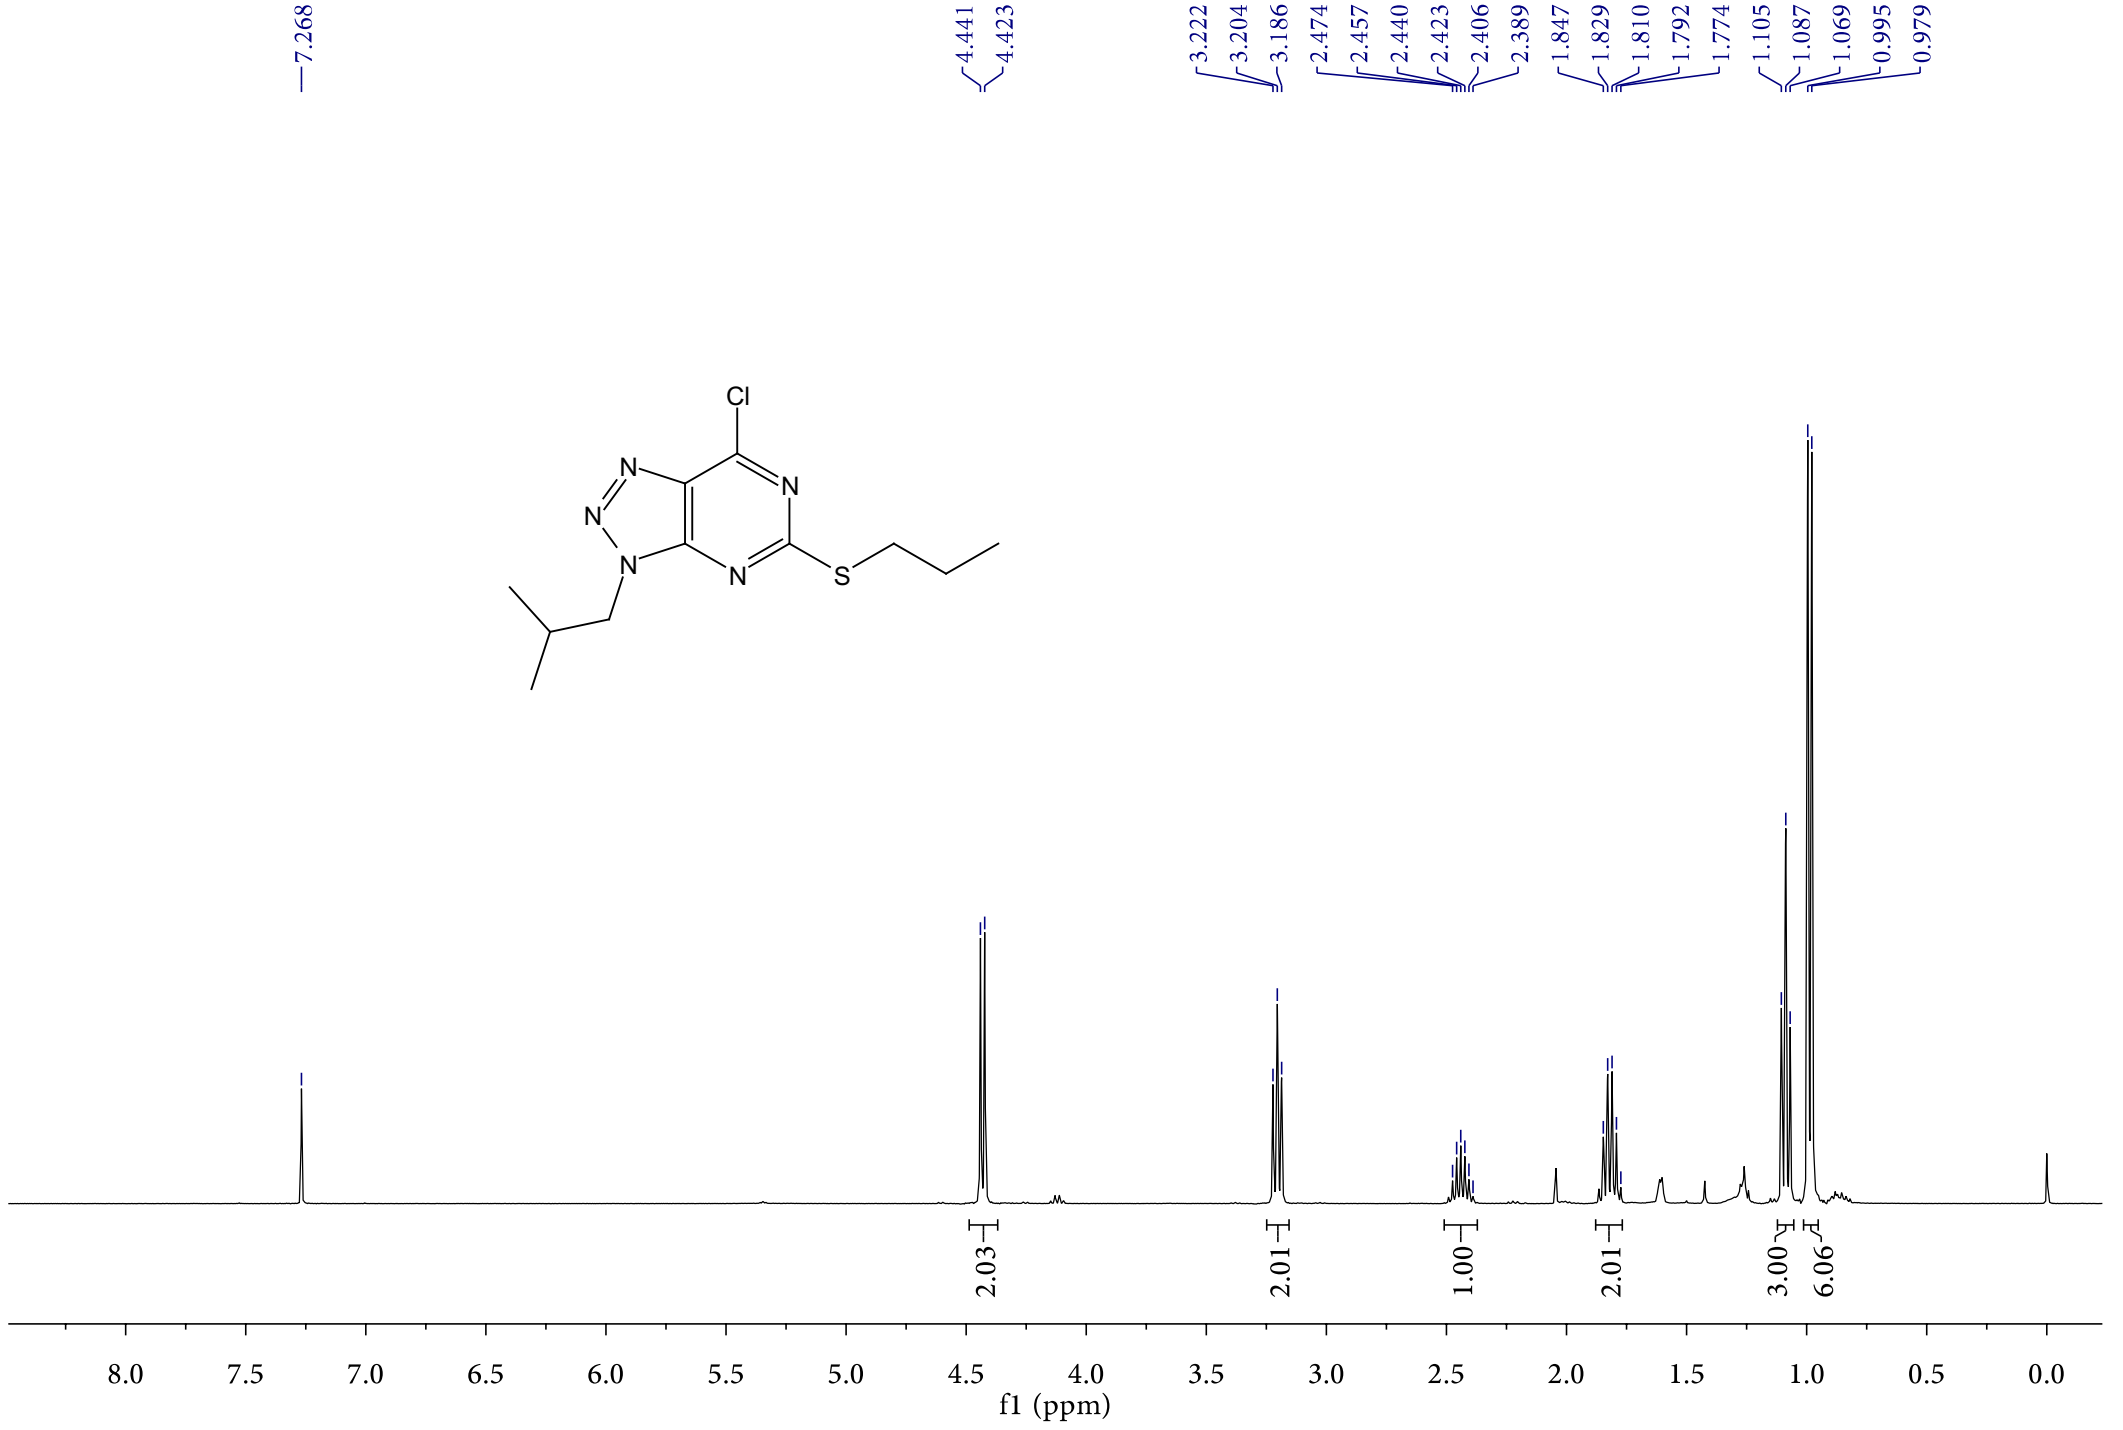

—11.005

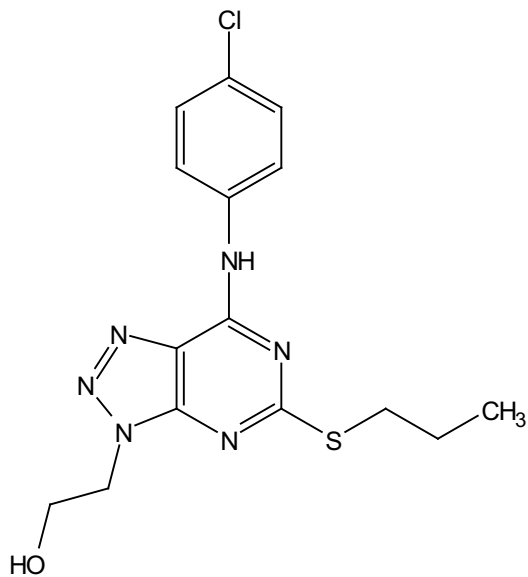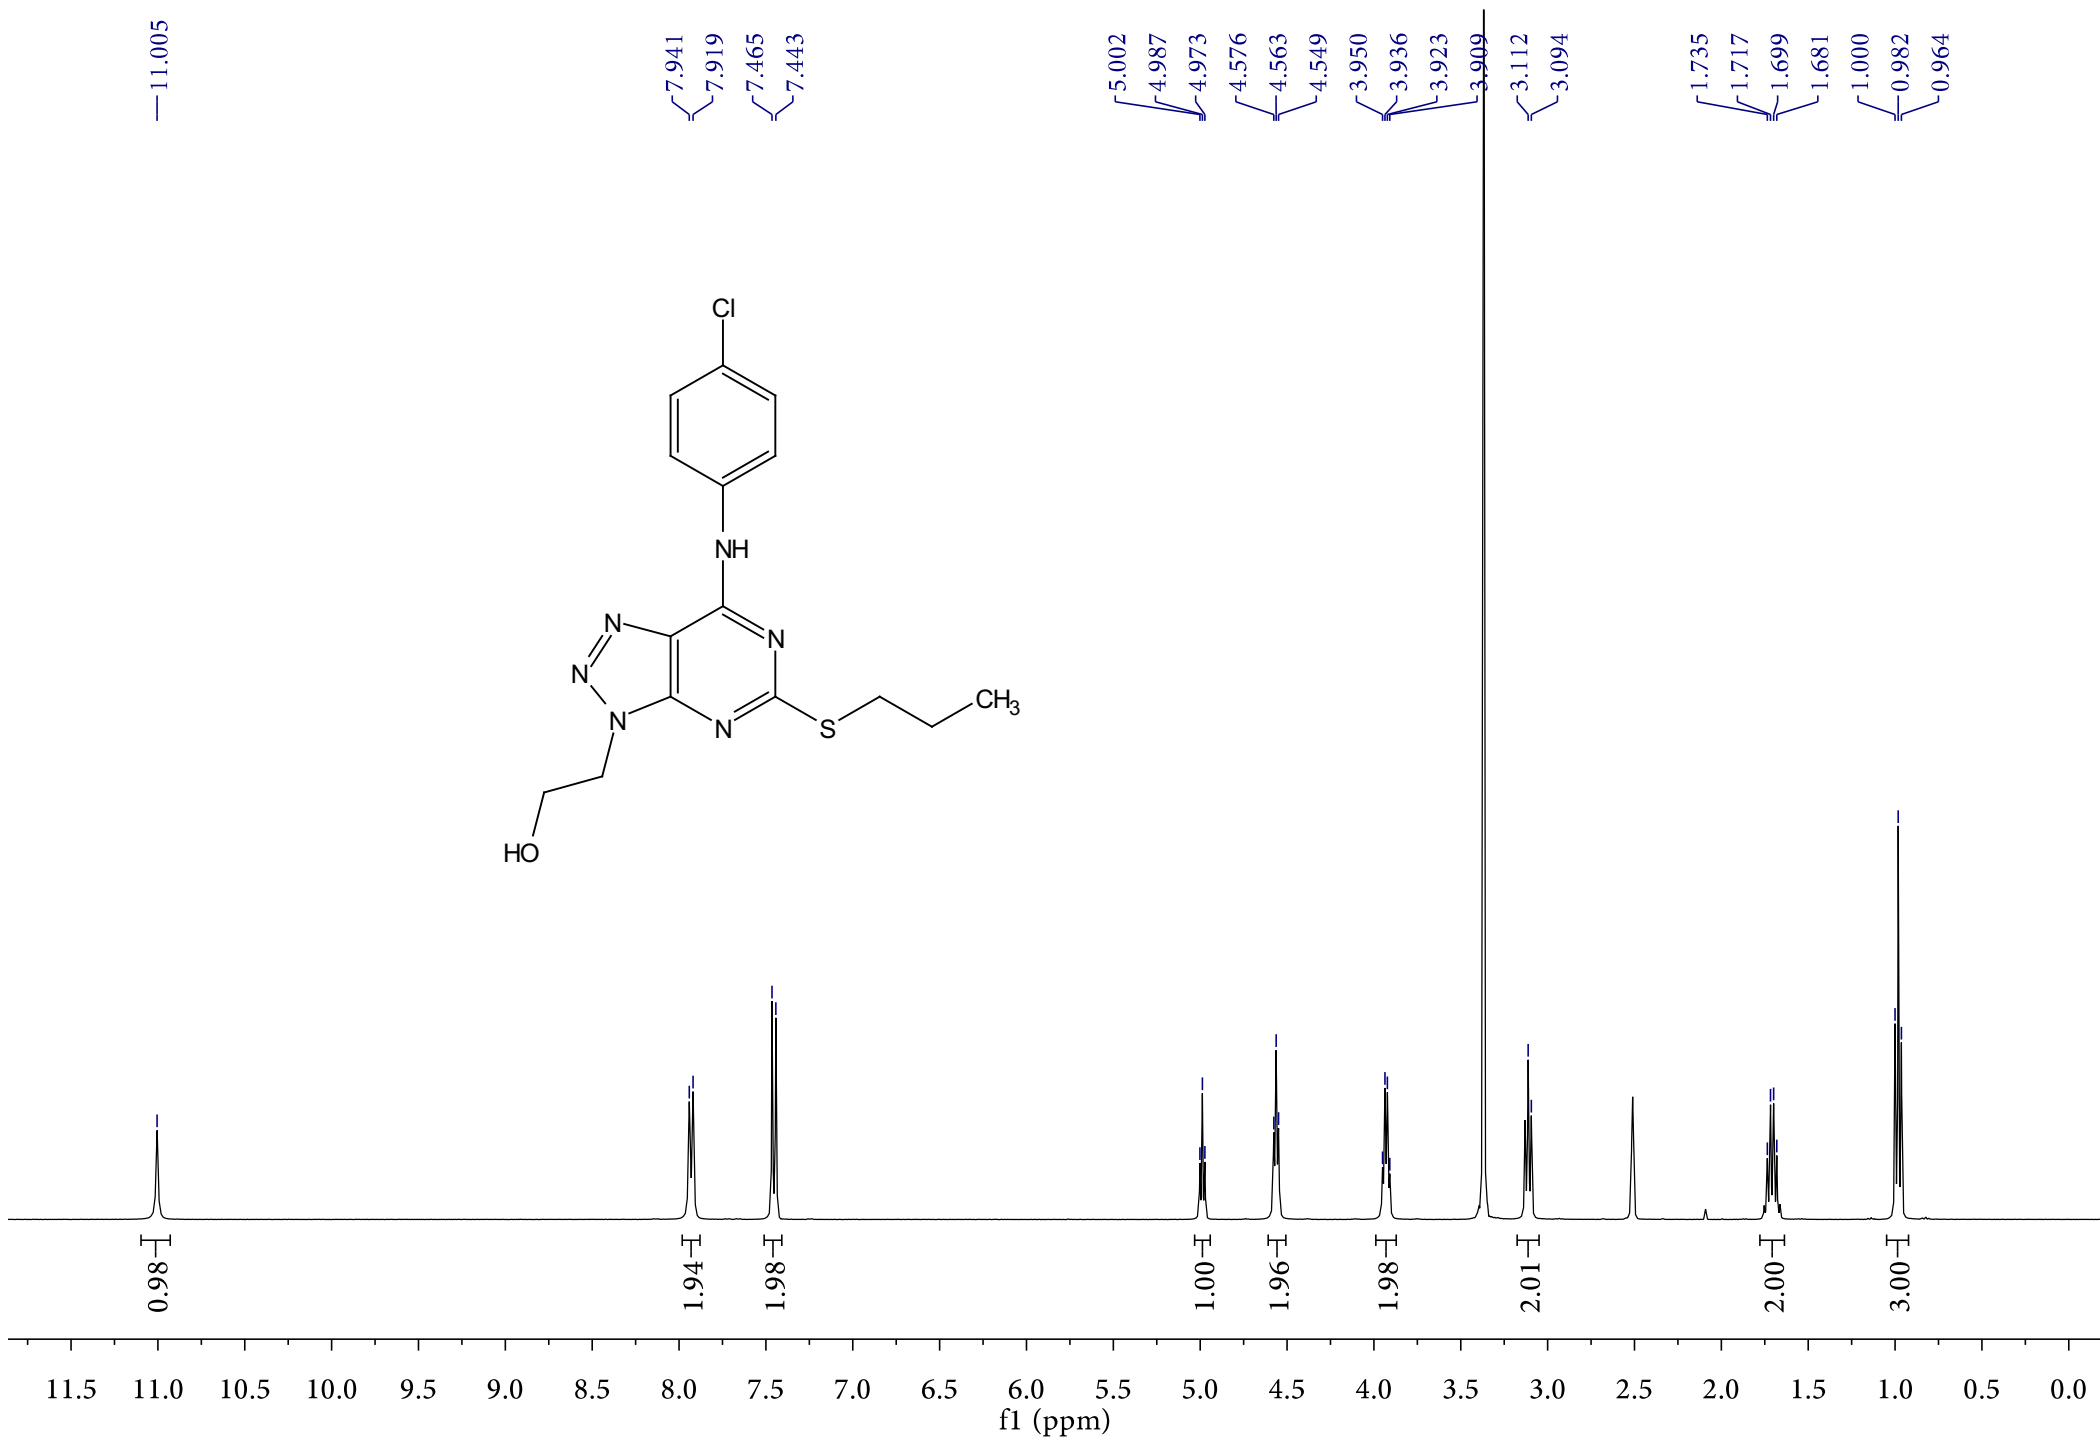

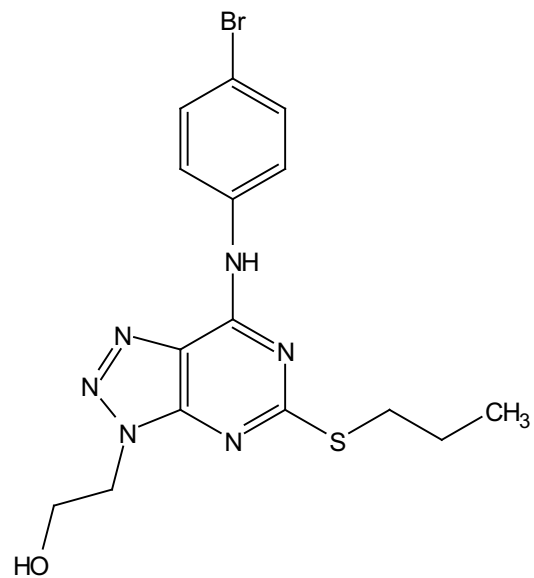

— 169.699

— 151.386

— 150.488

— 138.268

— 131.834

— 124.061

— 123.409

— 116.372

— 59.265

— 49.720

— 32.942

— 22.960

— 13.761

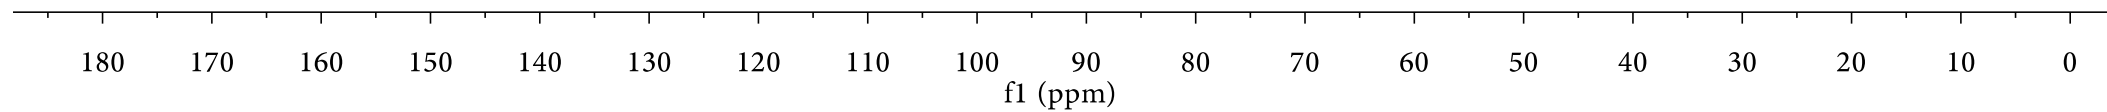

— 11.004

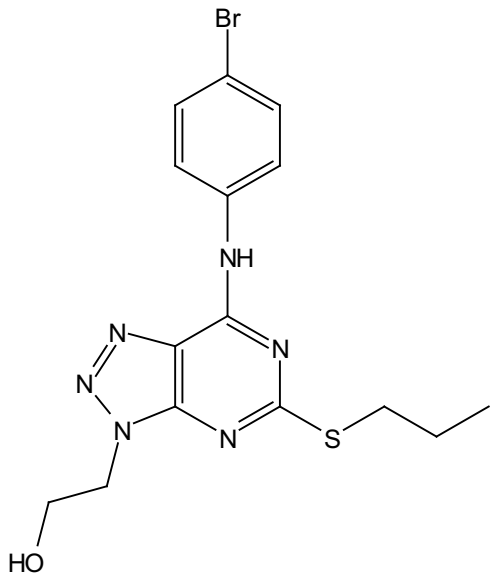

7.887  
7.865  
7.595  
7.590  
7.585  
7.573  
7.568

4.576  
4.562  
4.548  
3.941  
3.927  
3.913  
3.130  
3.113  
3.098  
3.095

1.735  
1.717  
1.699  
1.681  
1.000  
0.982  
0.963

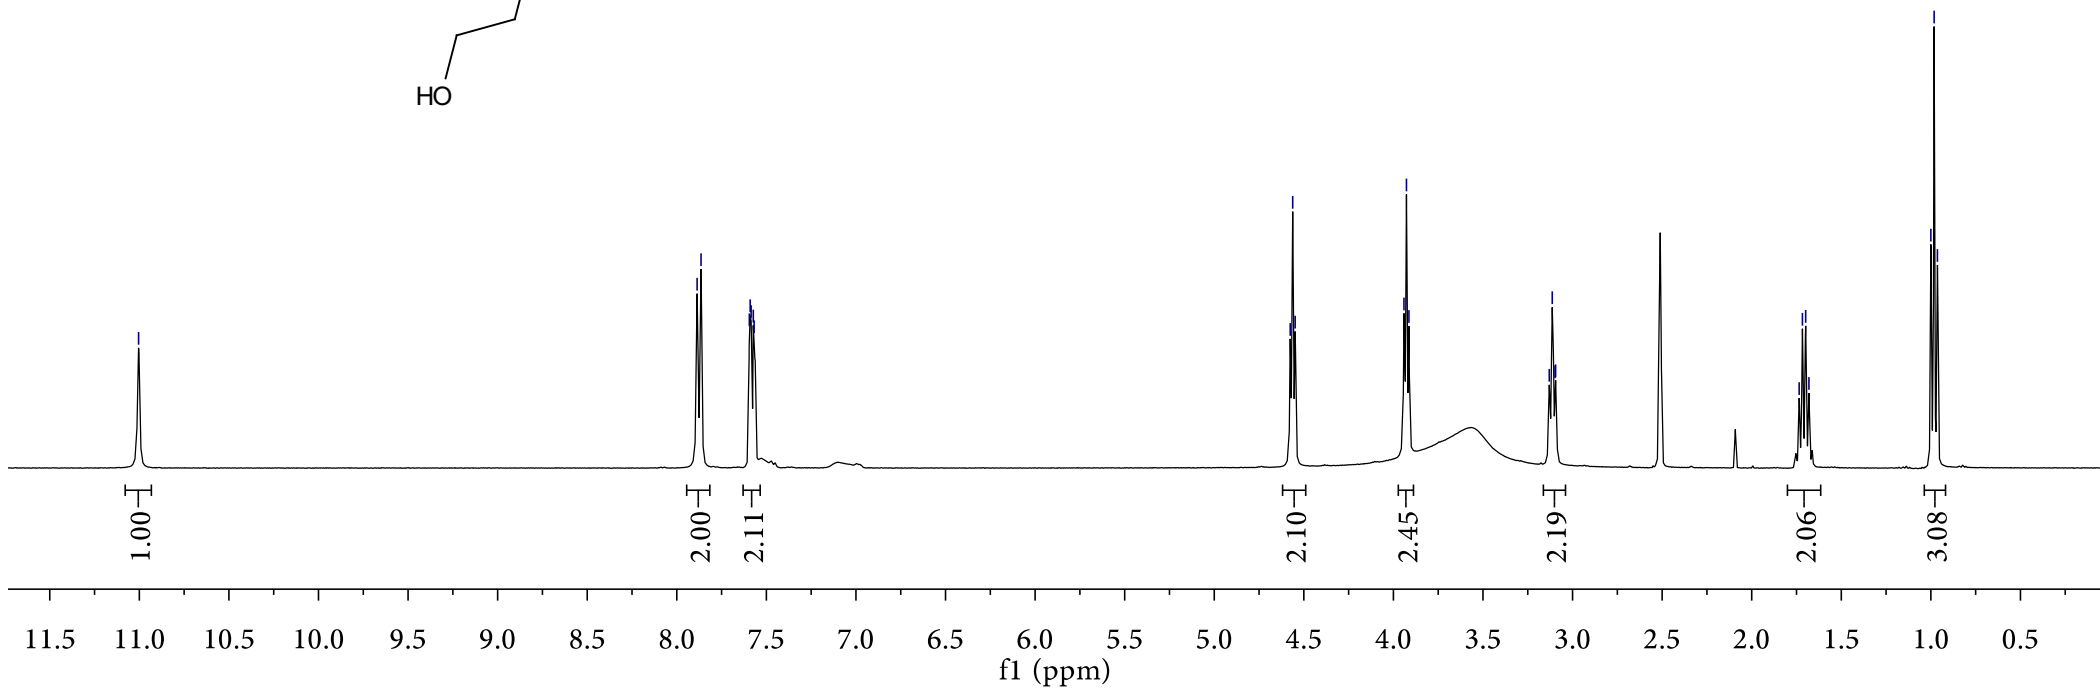

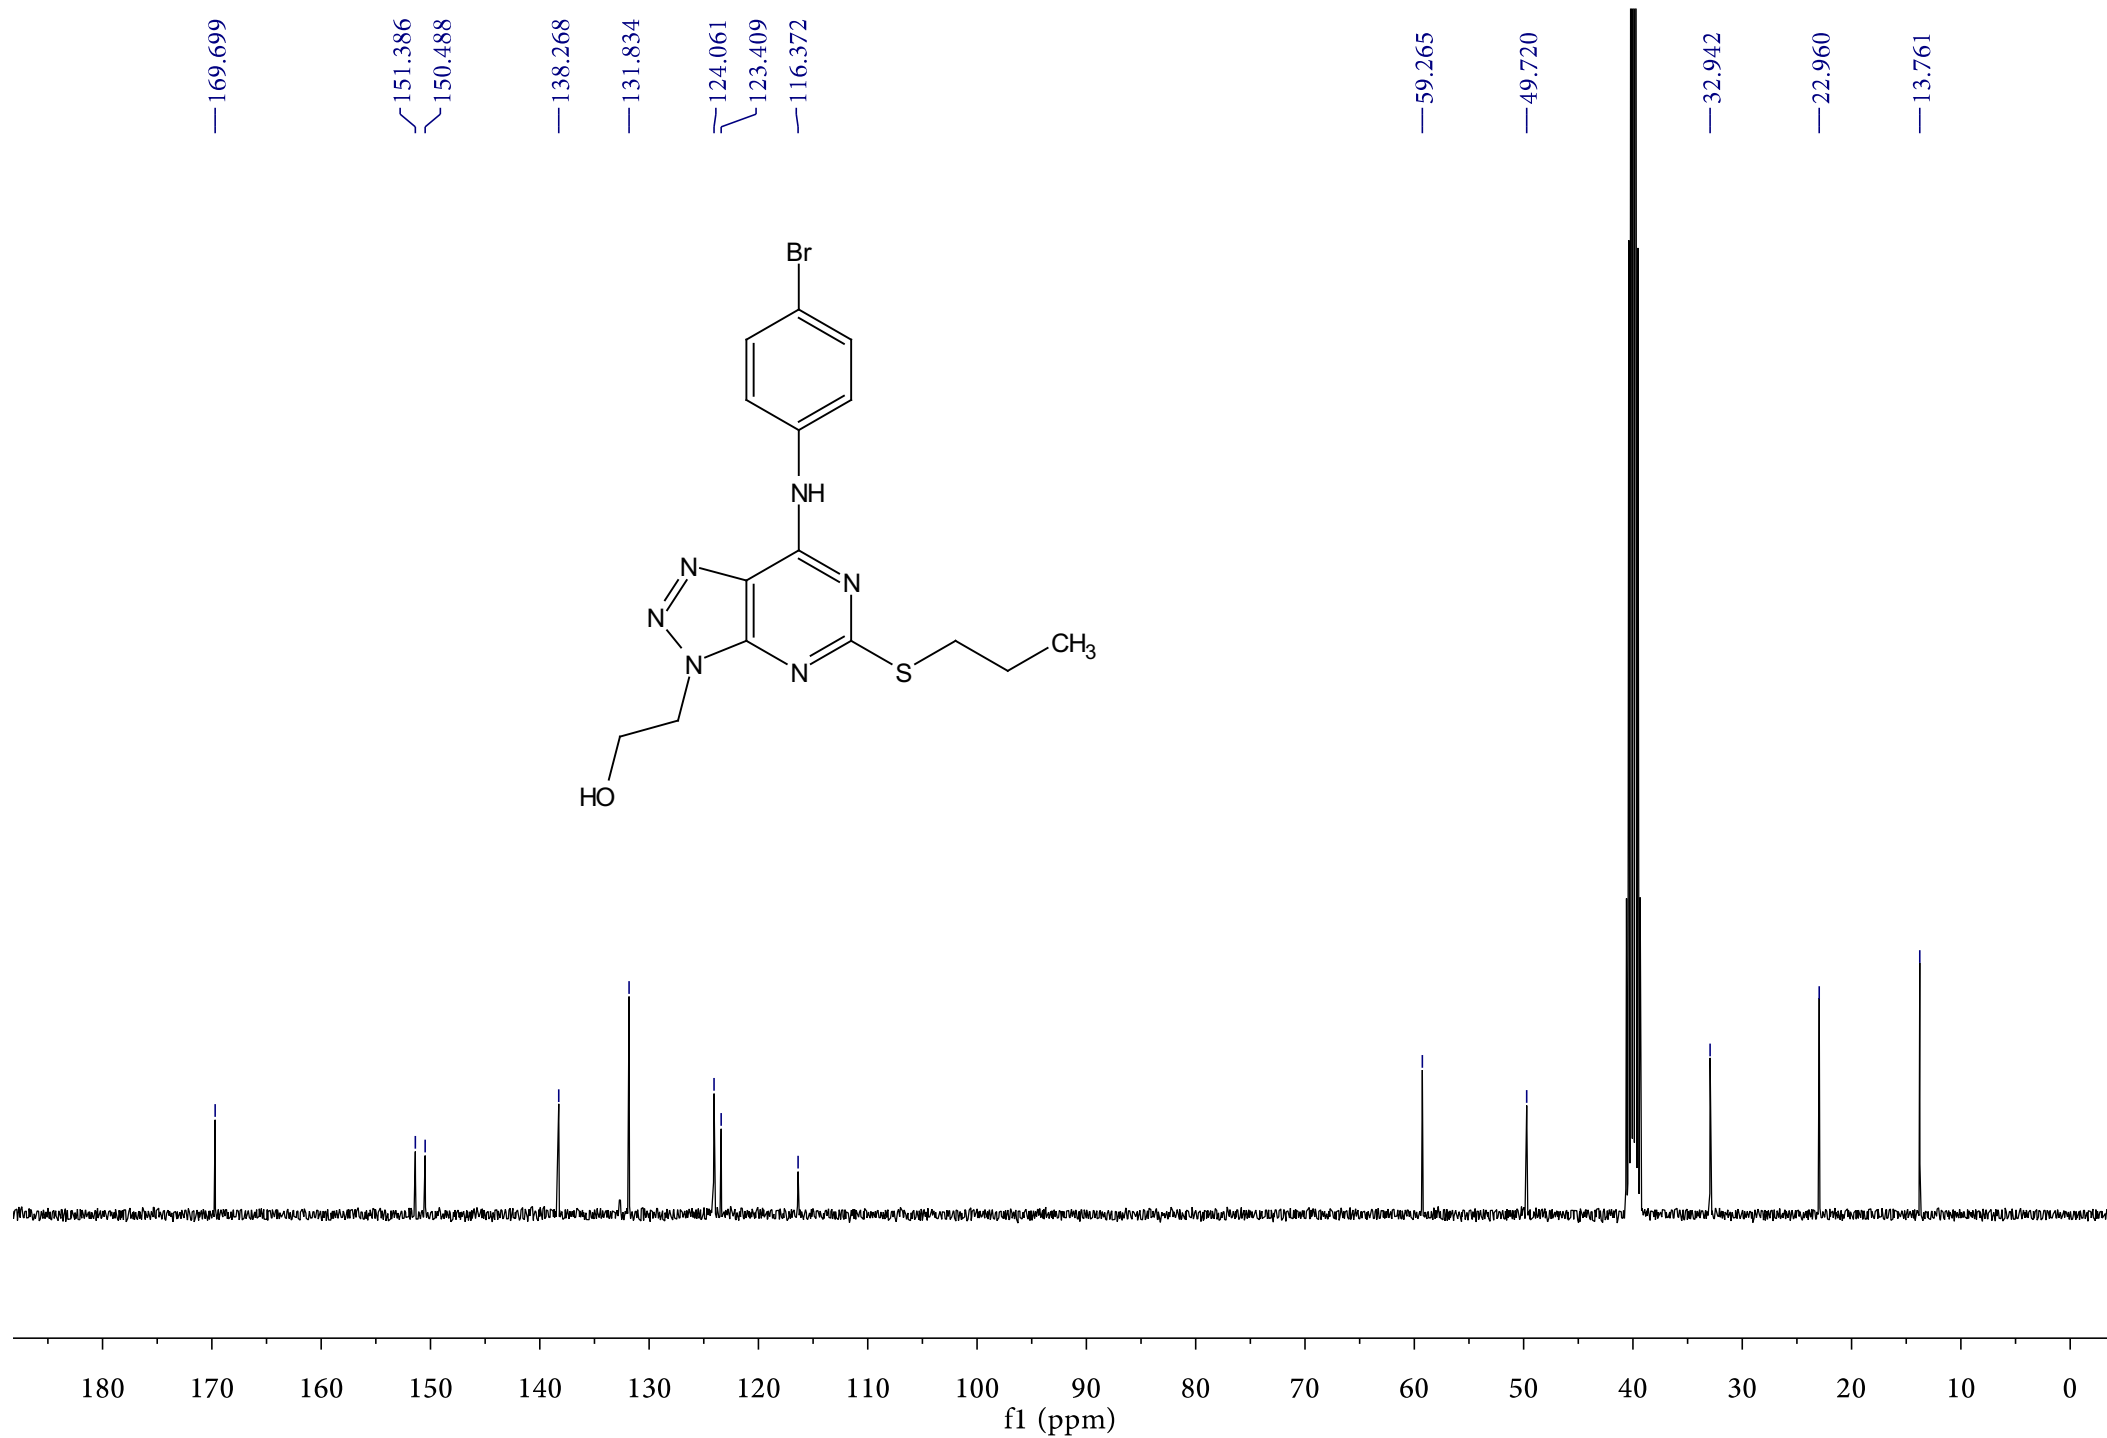

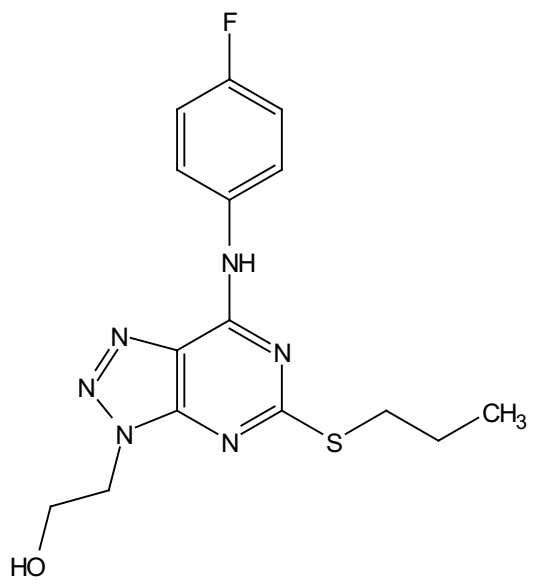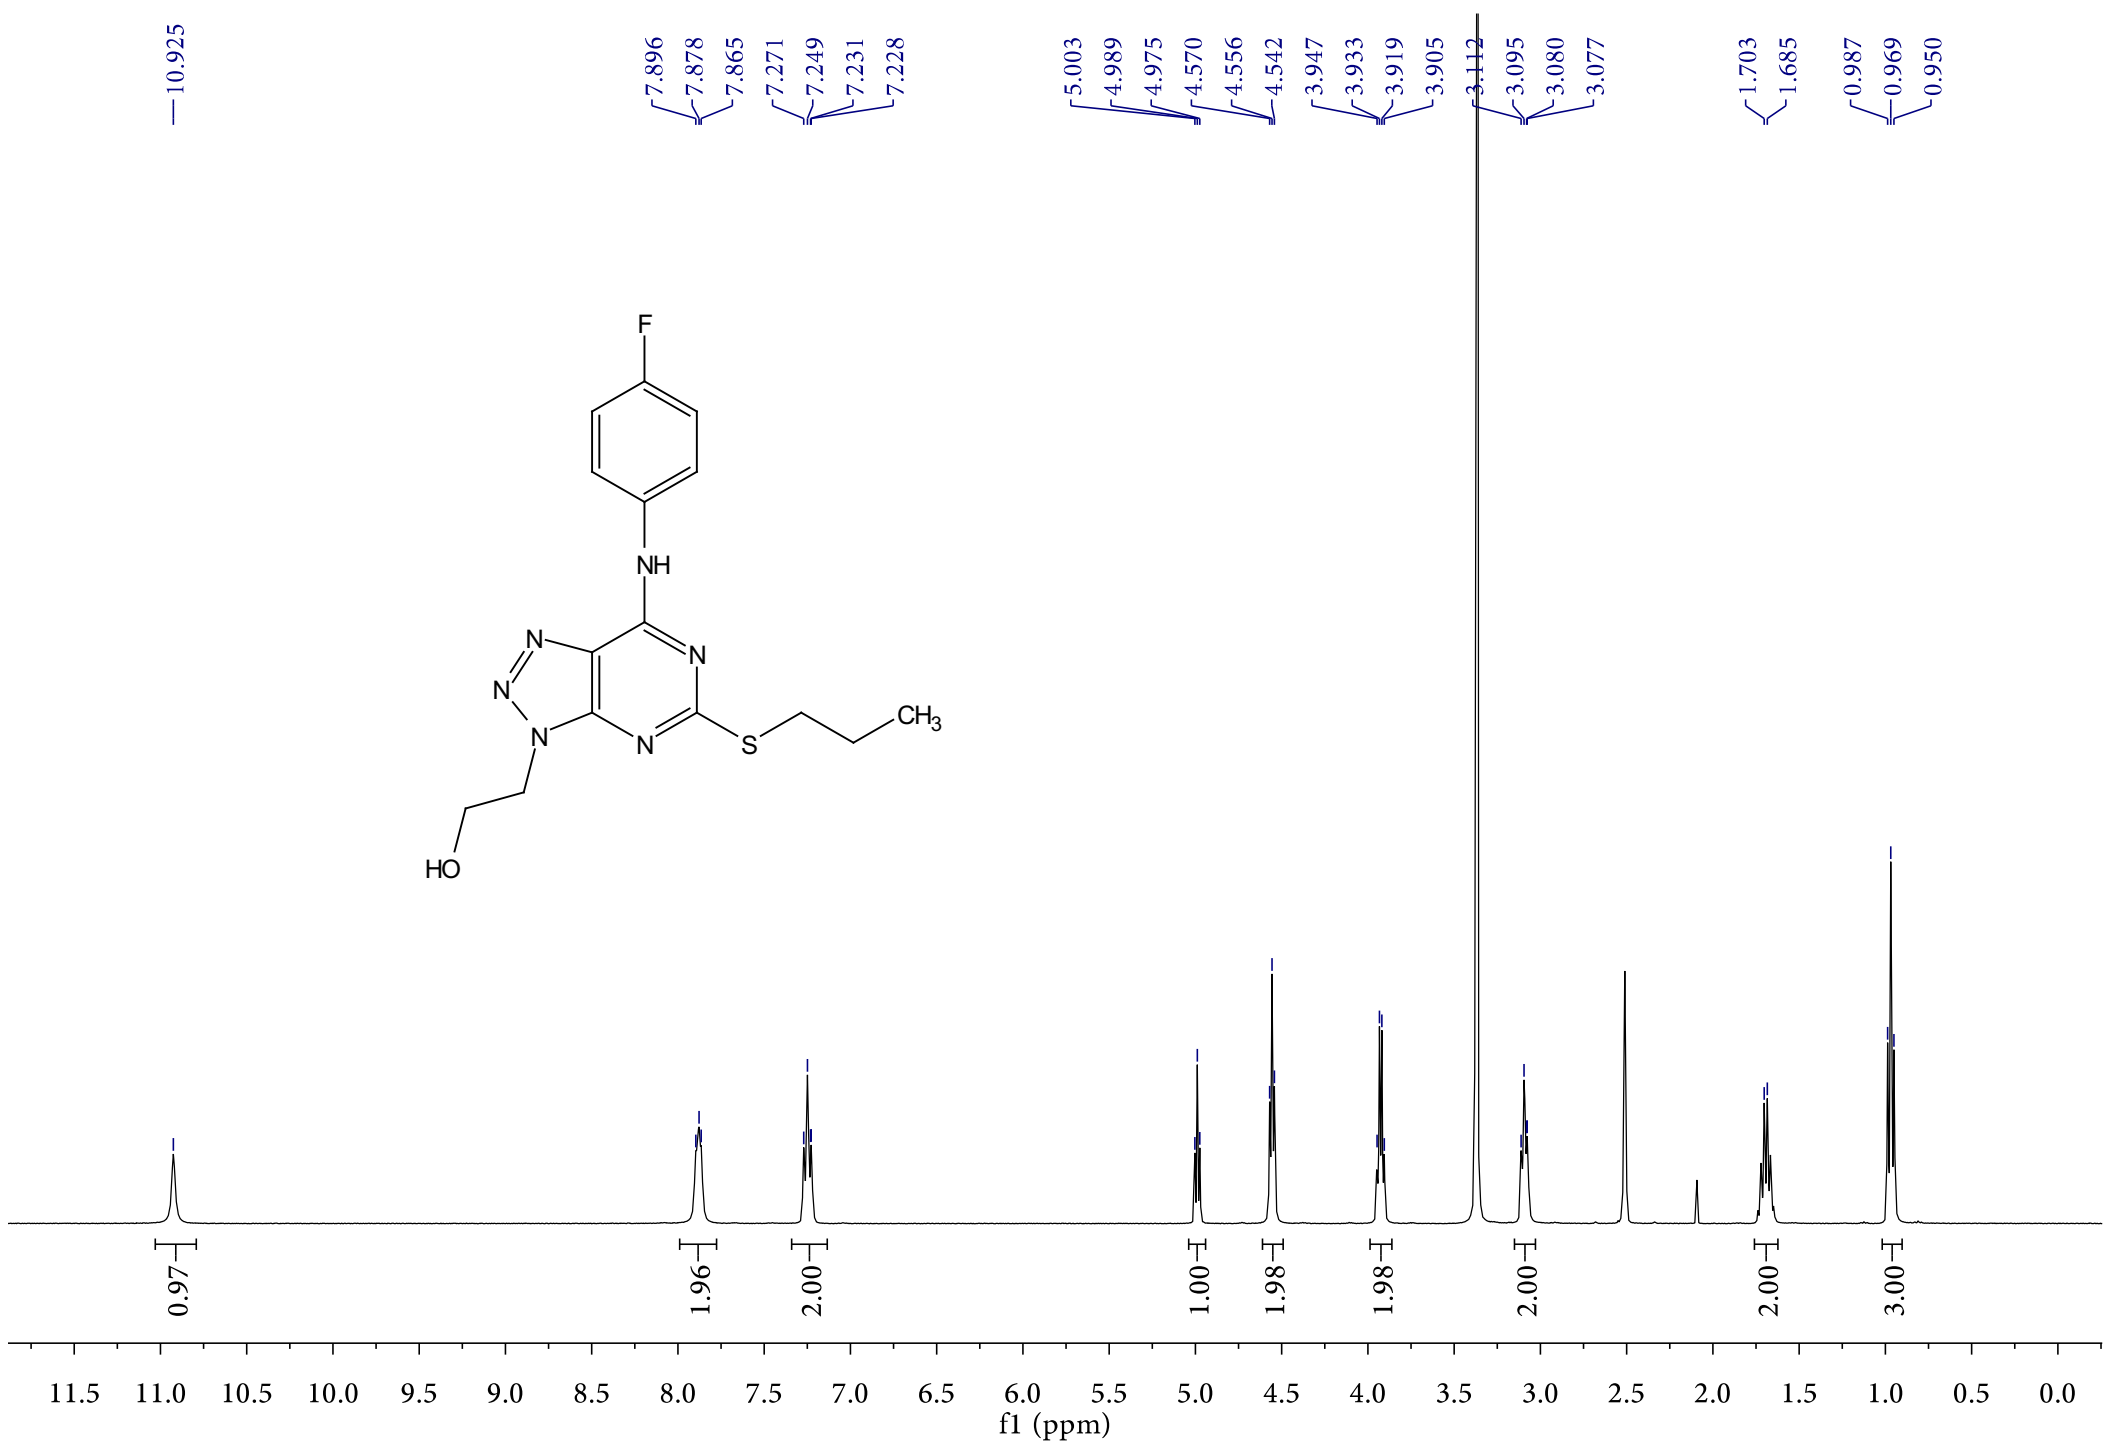

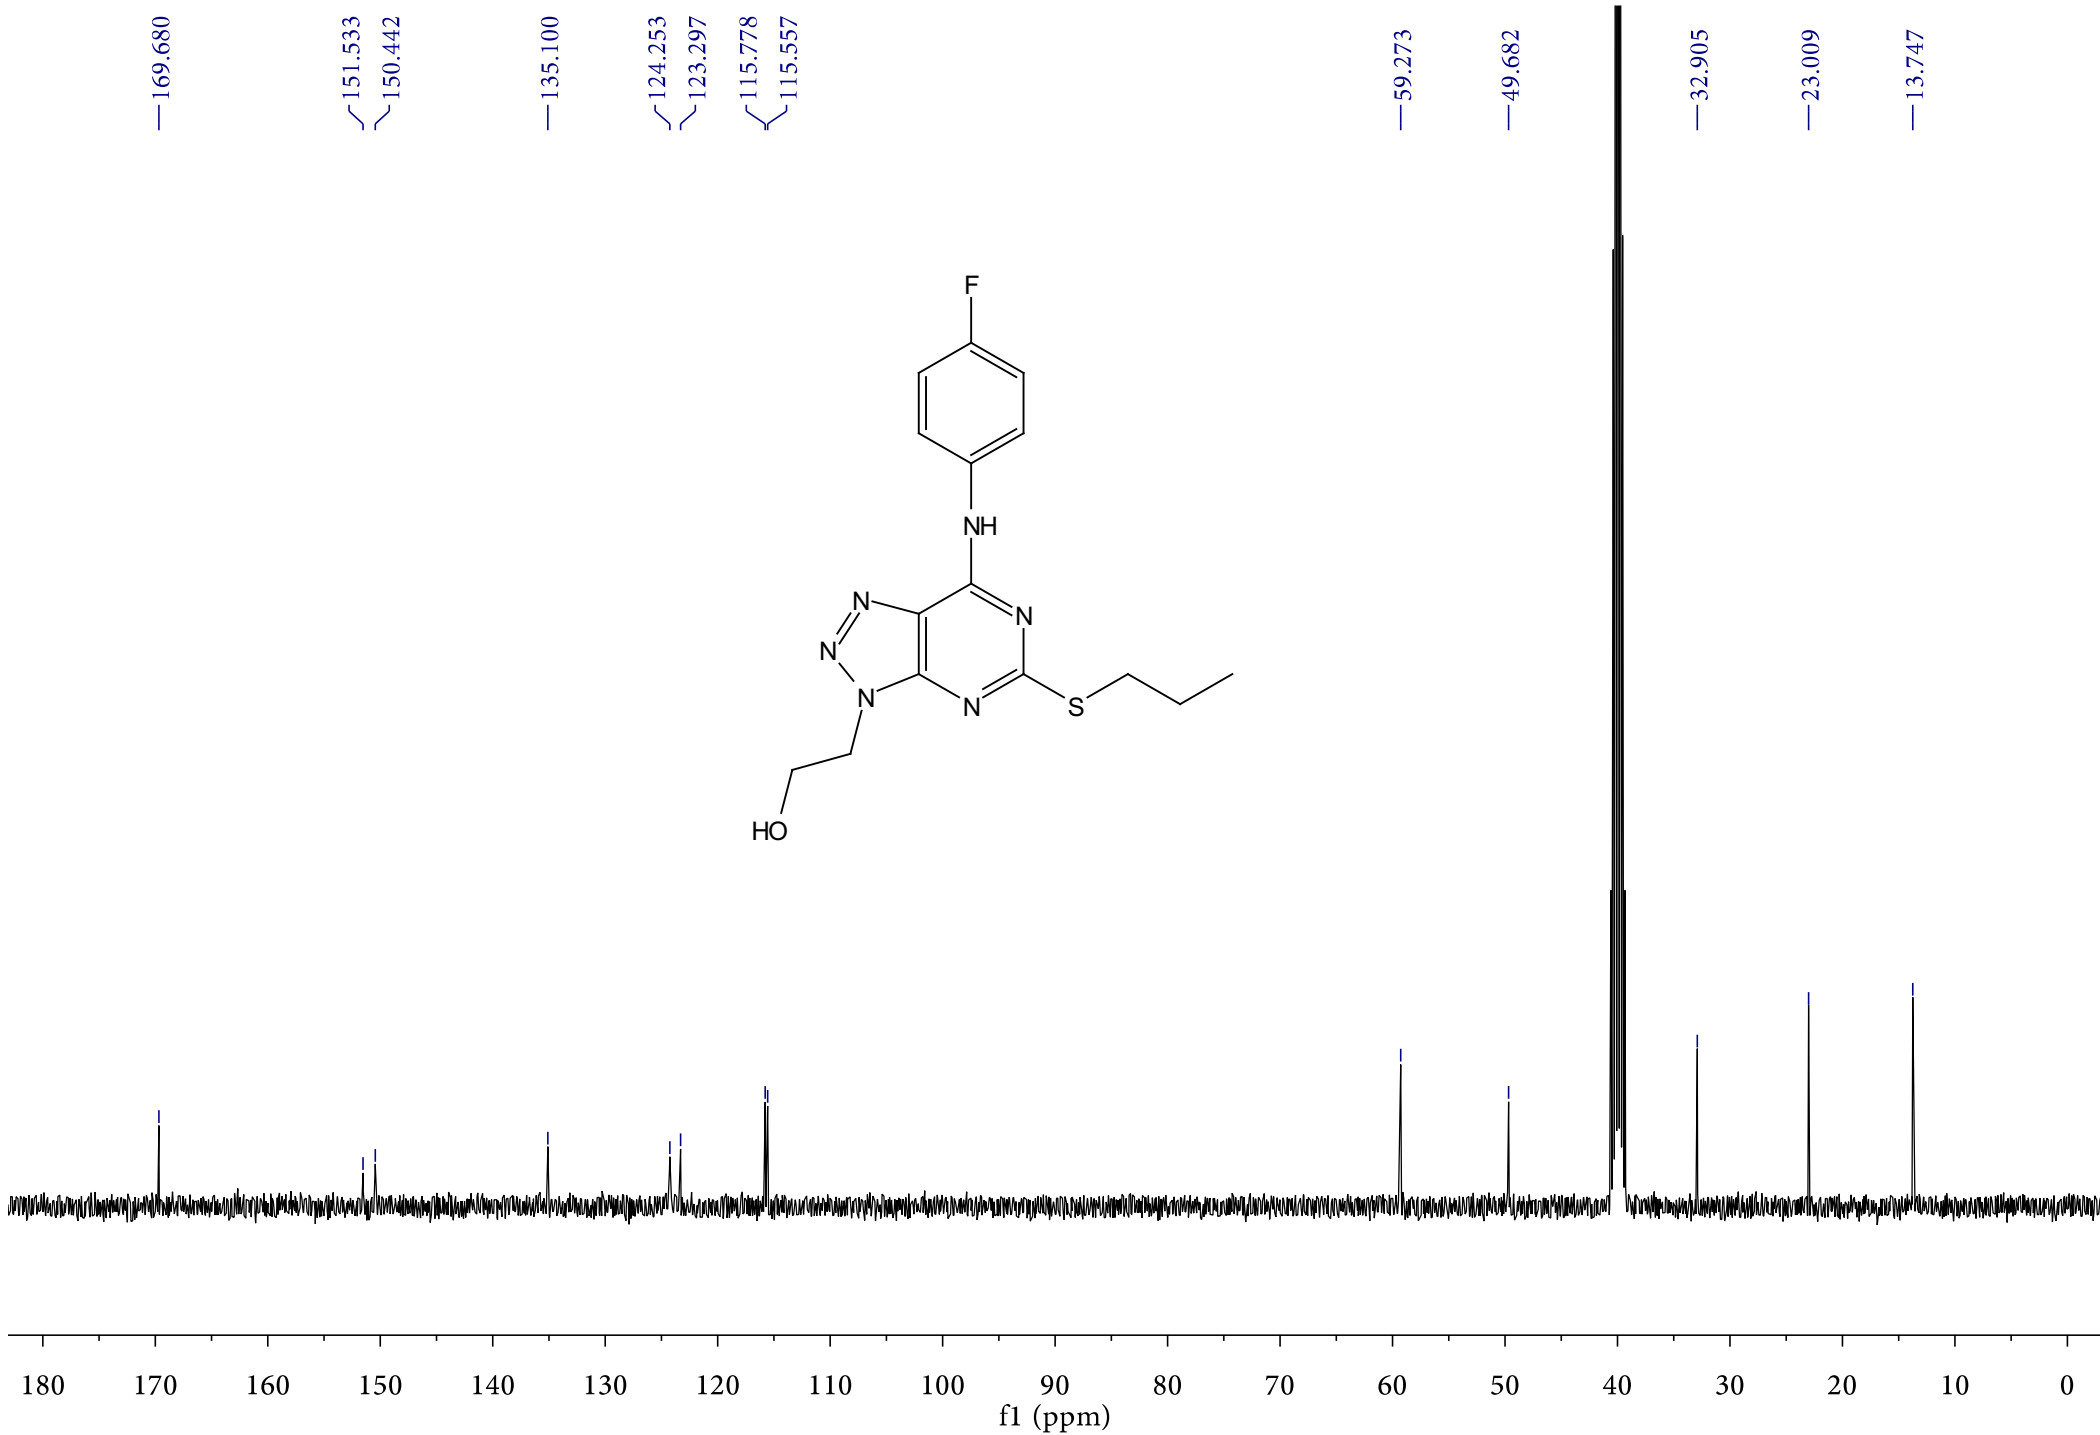



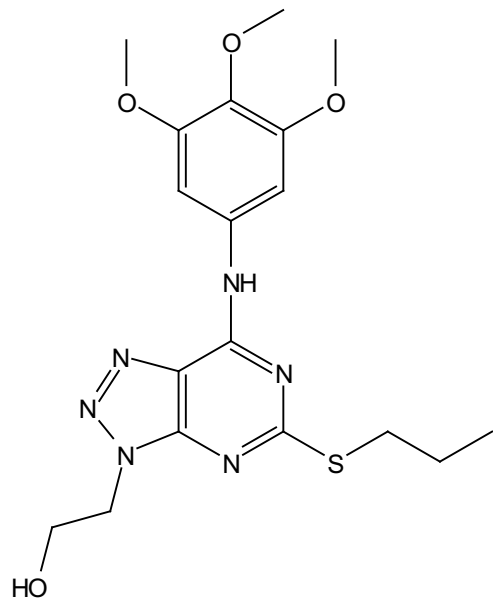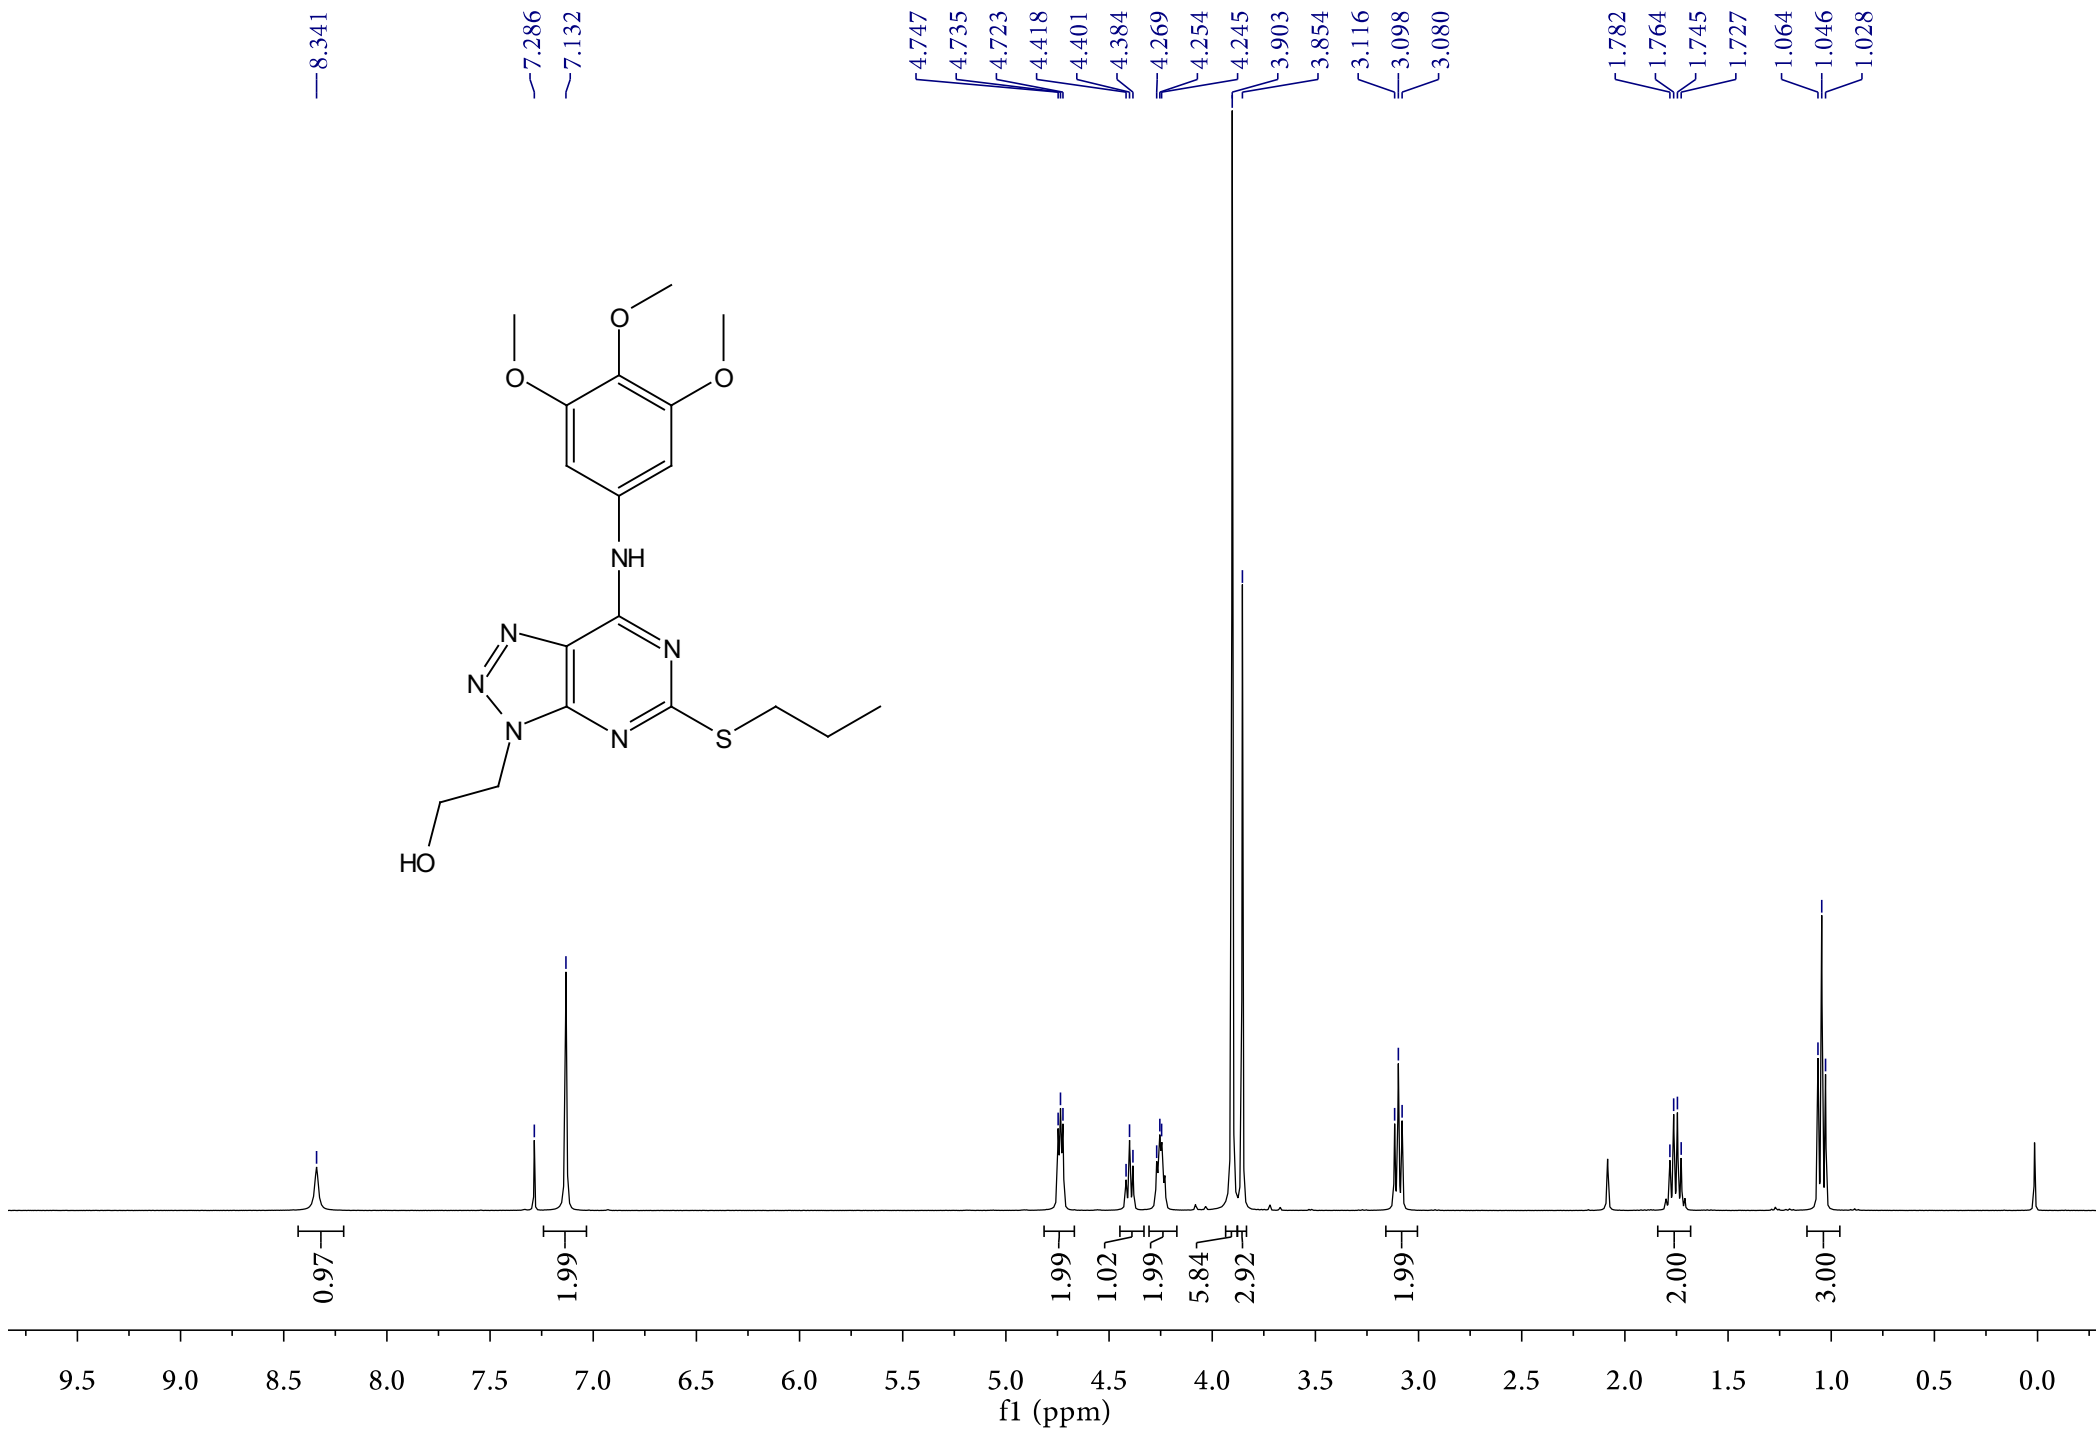

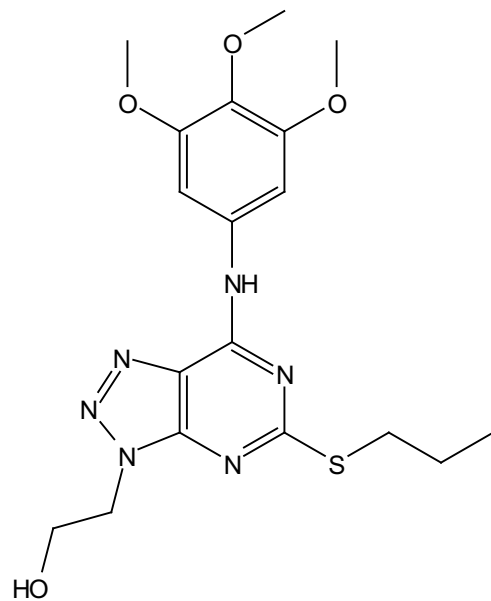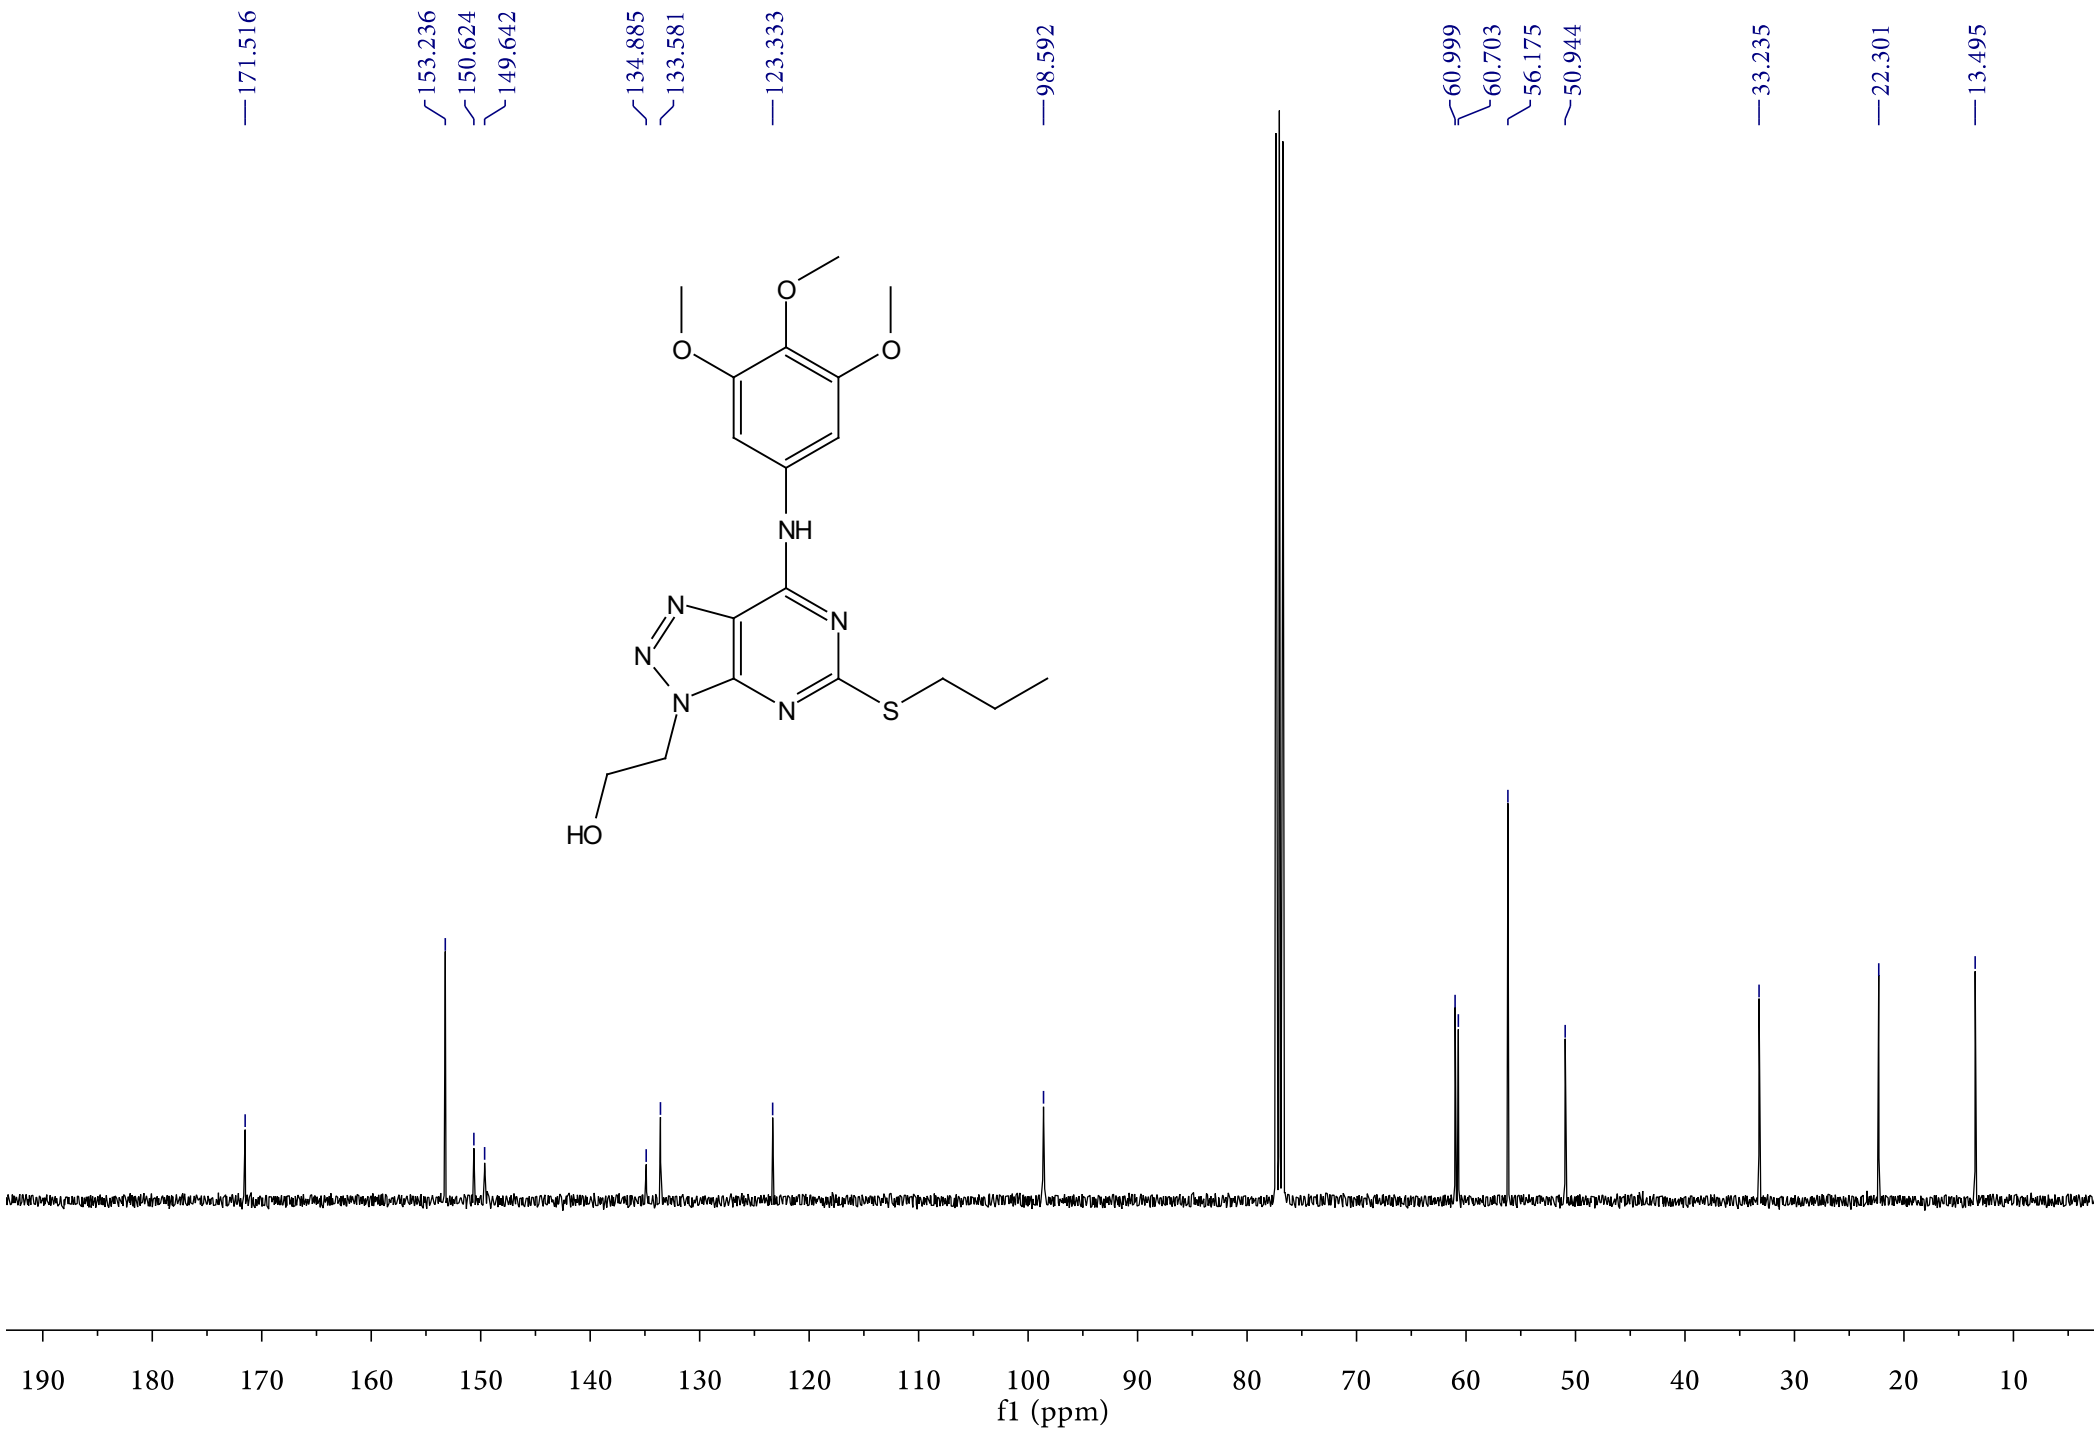

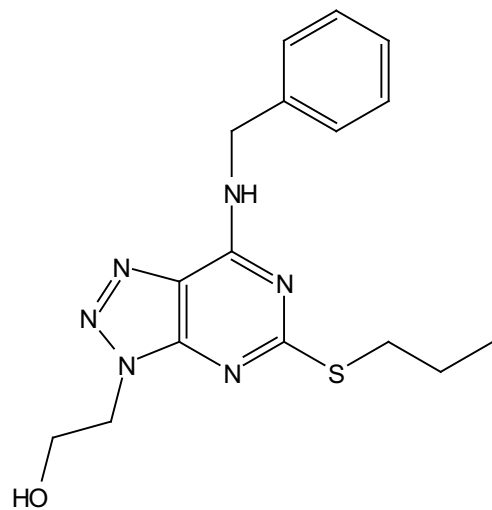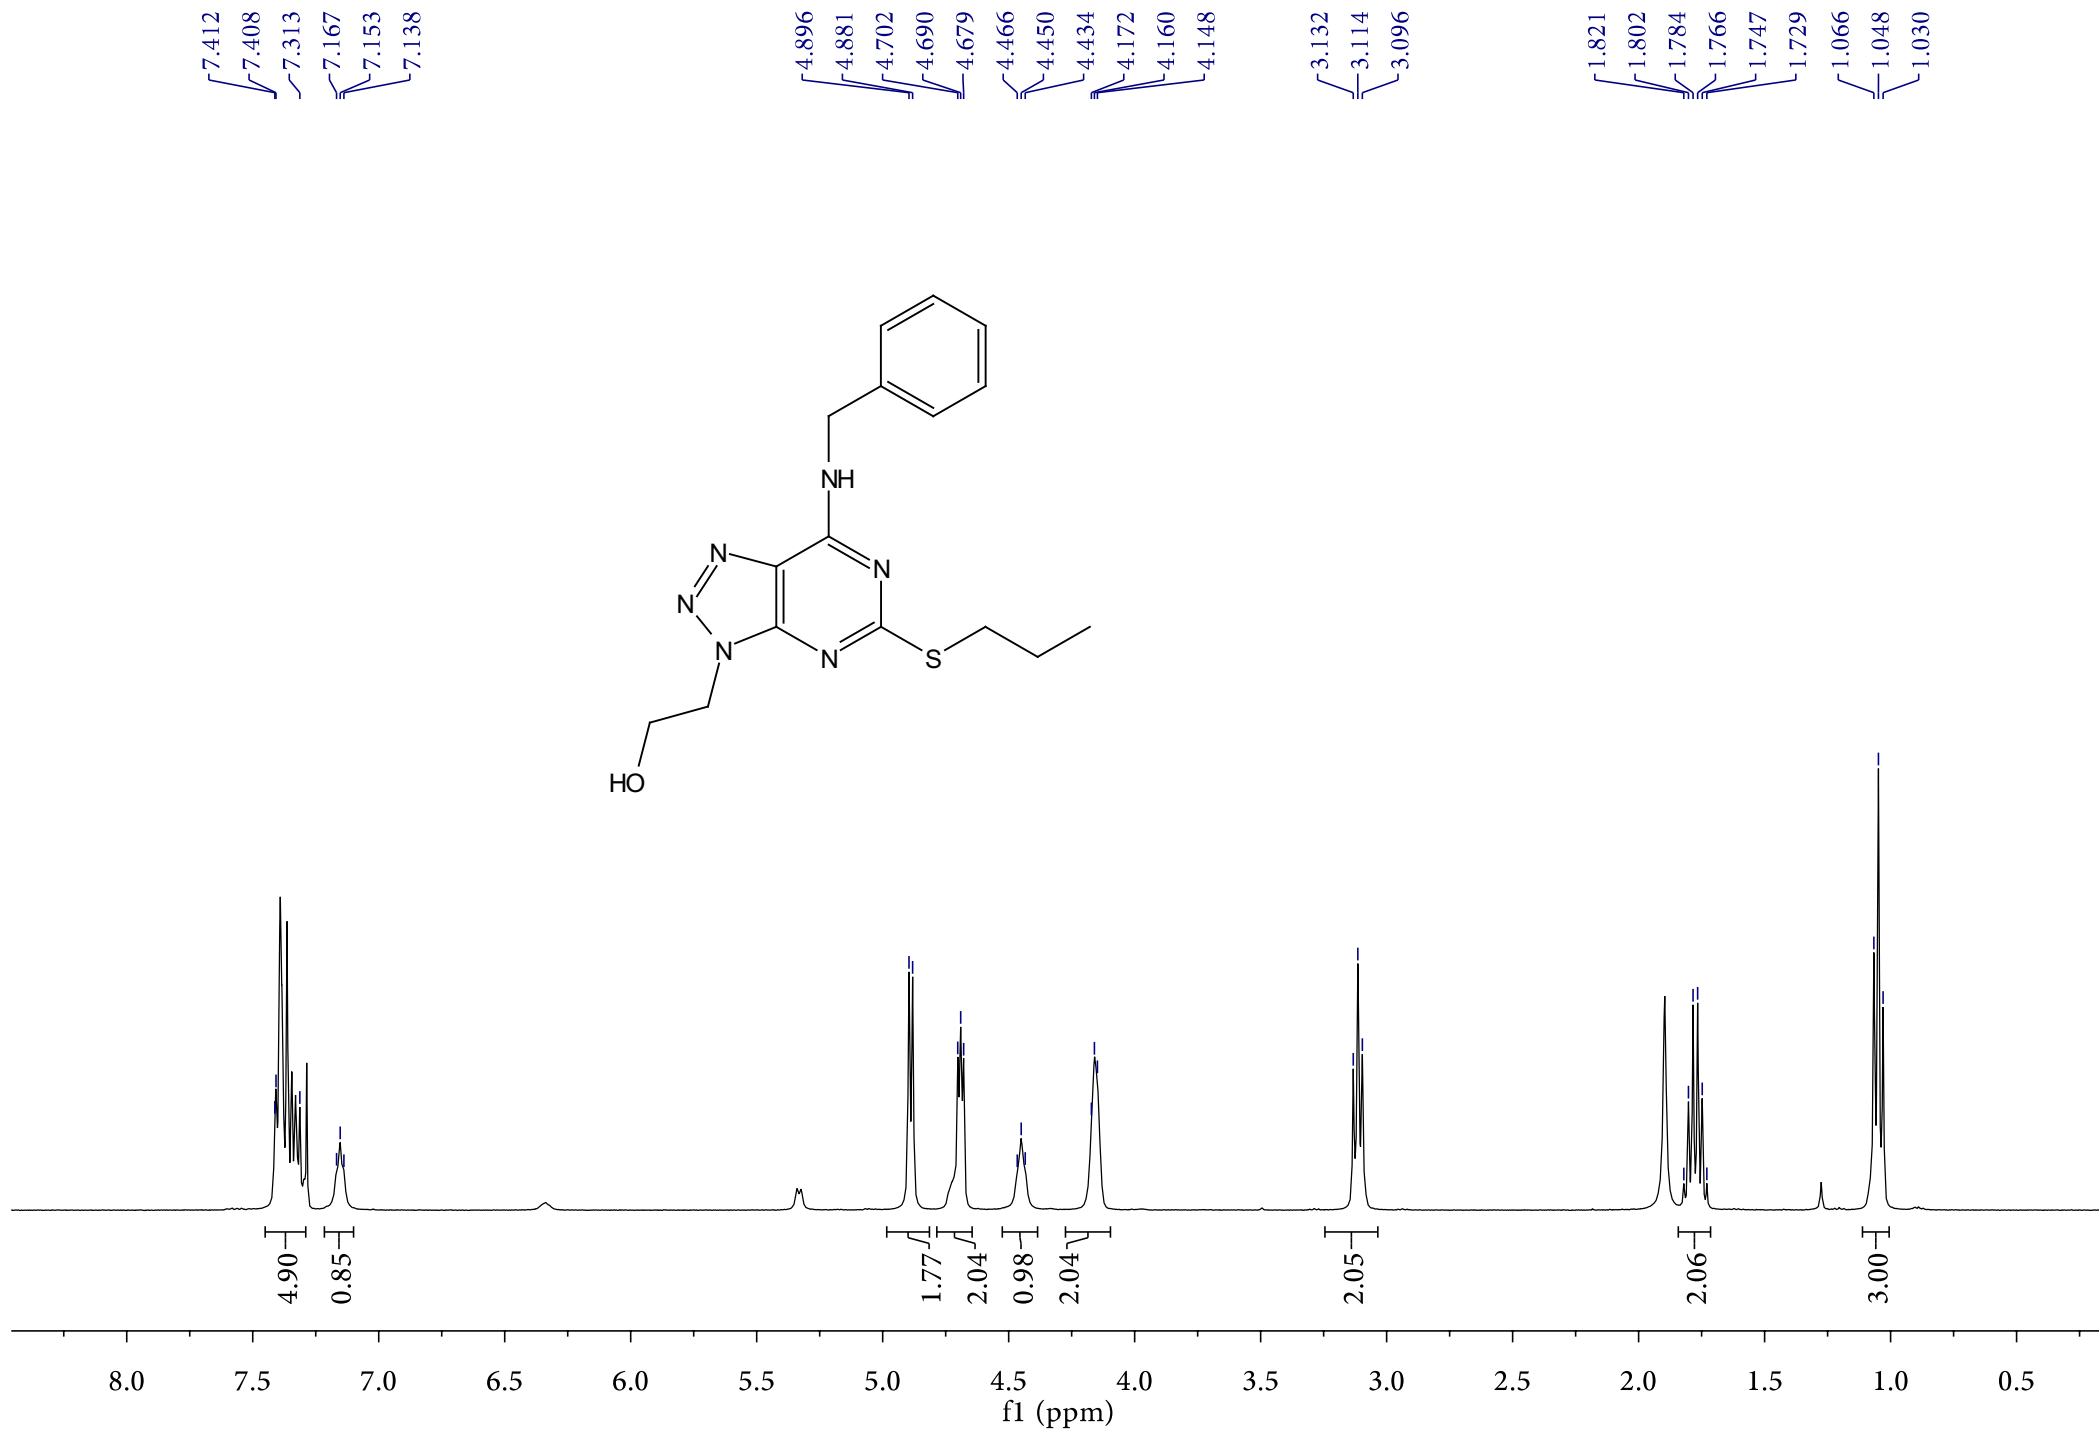

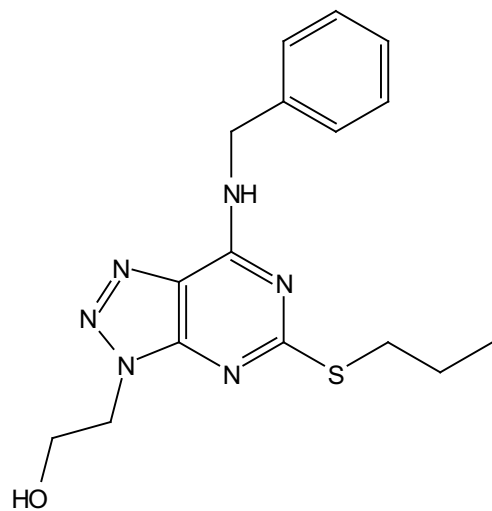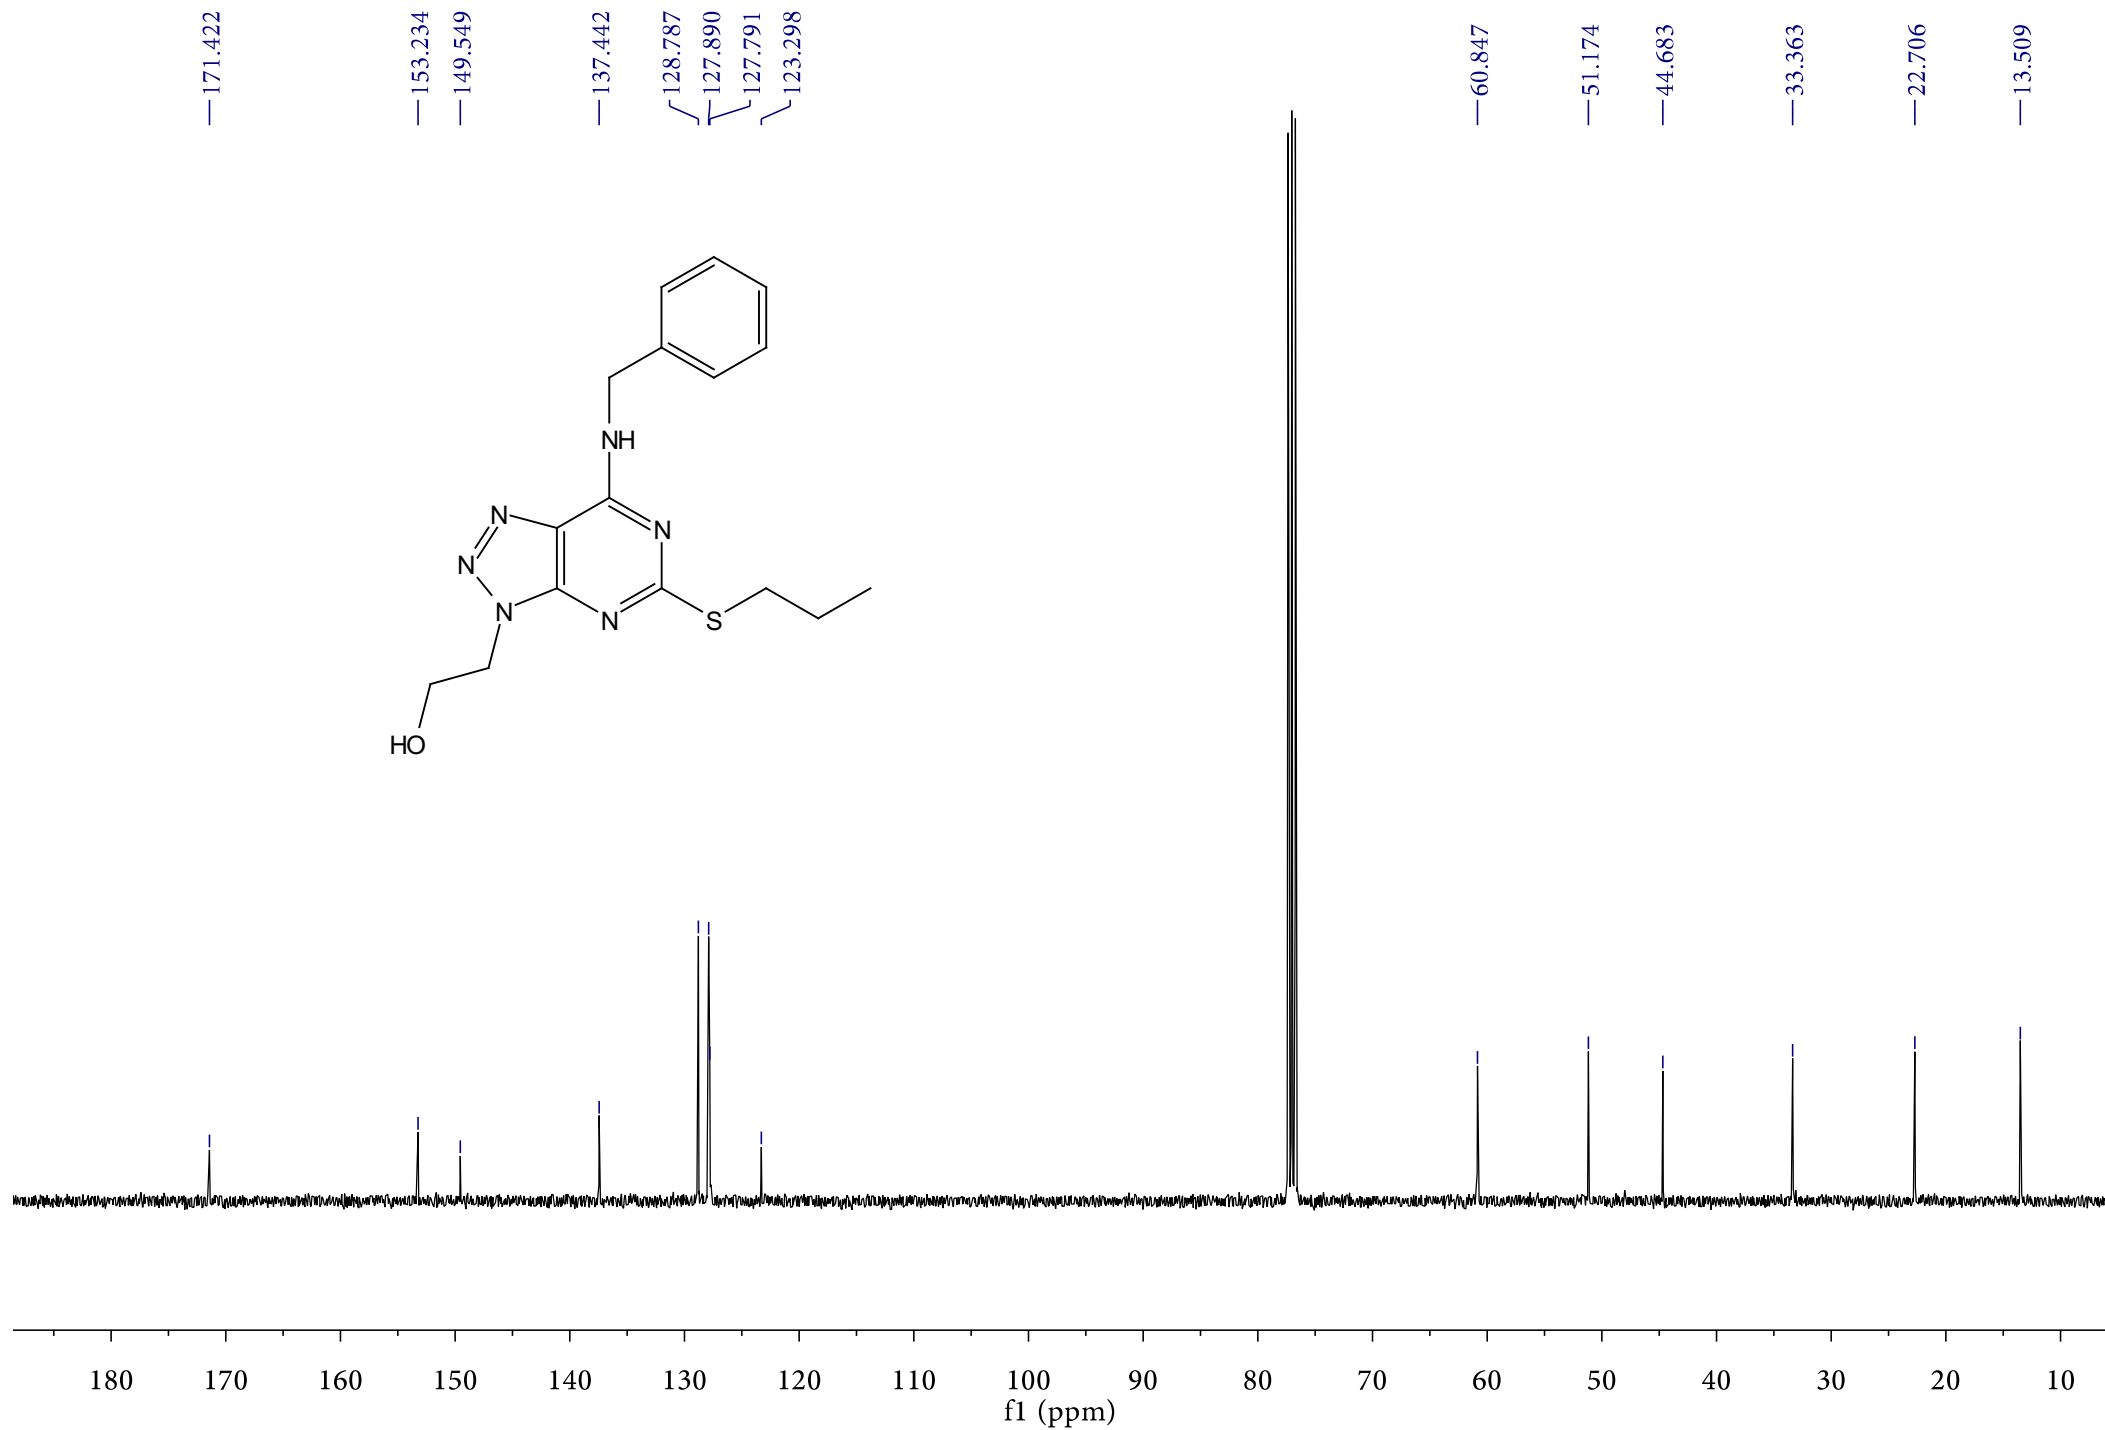

7.295  
7.286  
7.275  
7.175  
7.156

4.845  
4.831  
4.699  
4.687  
4.676  
4.497  
4.481  
4.465  
4.173  
4.159  
4.150  
4.135

3.143  
3.125  
3.107

2.358

1.815  
1.797  
1.778  
1.760

1.078  
1.059  
1.041

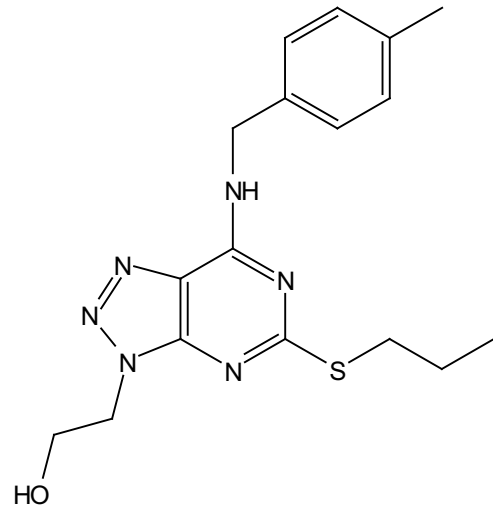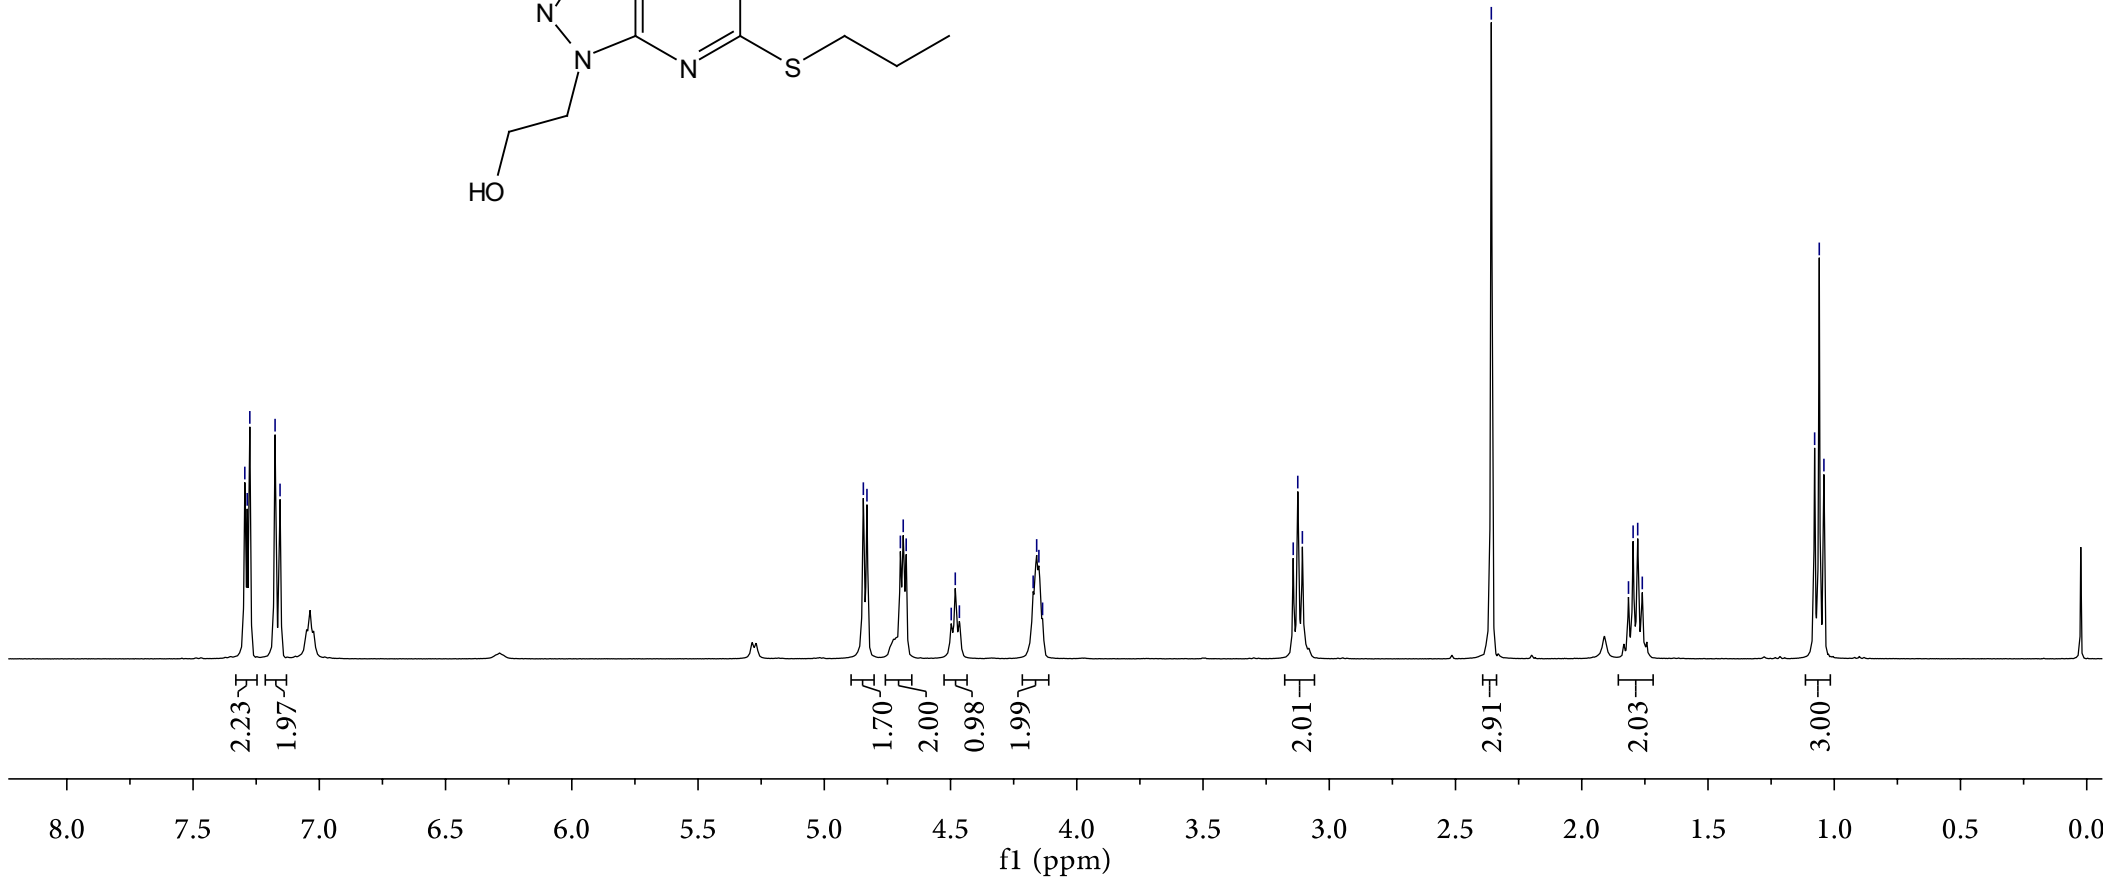

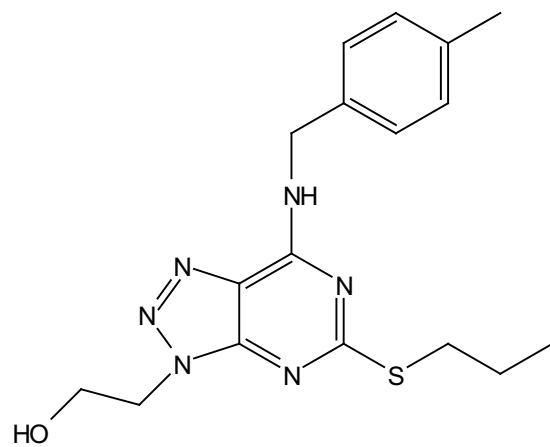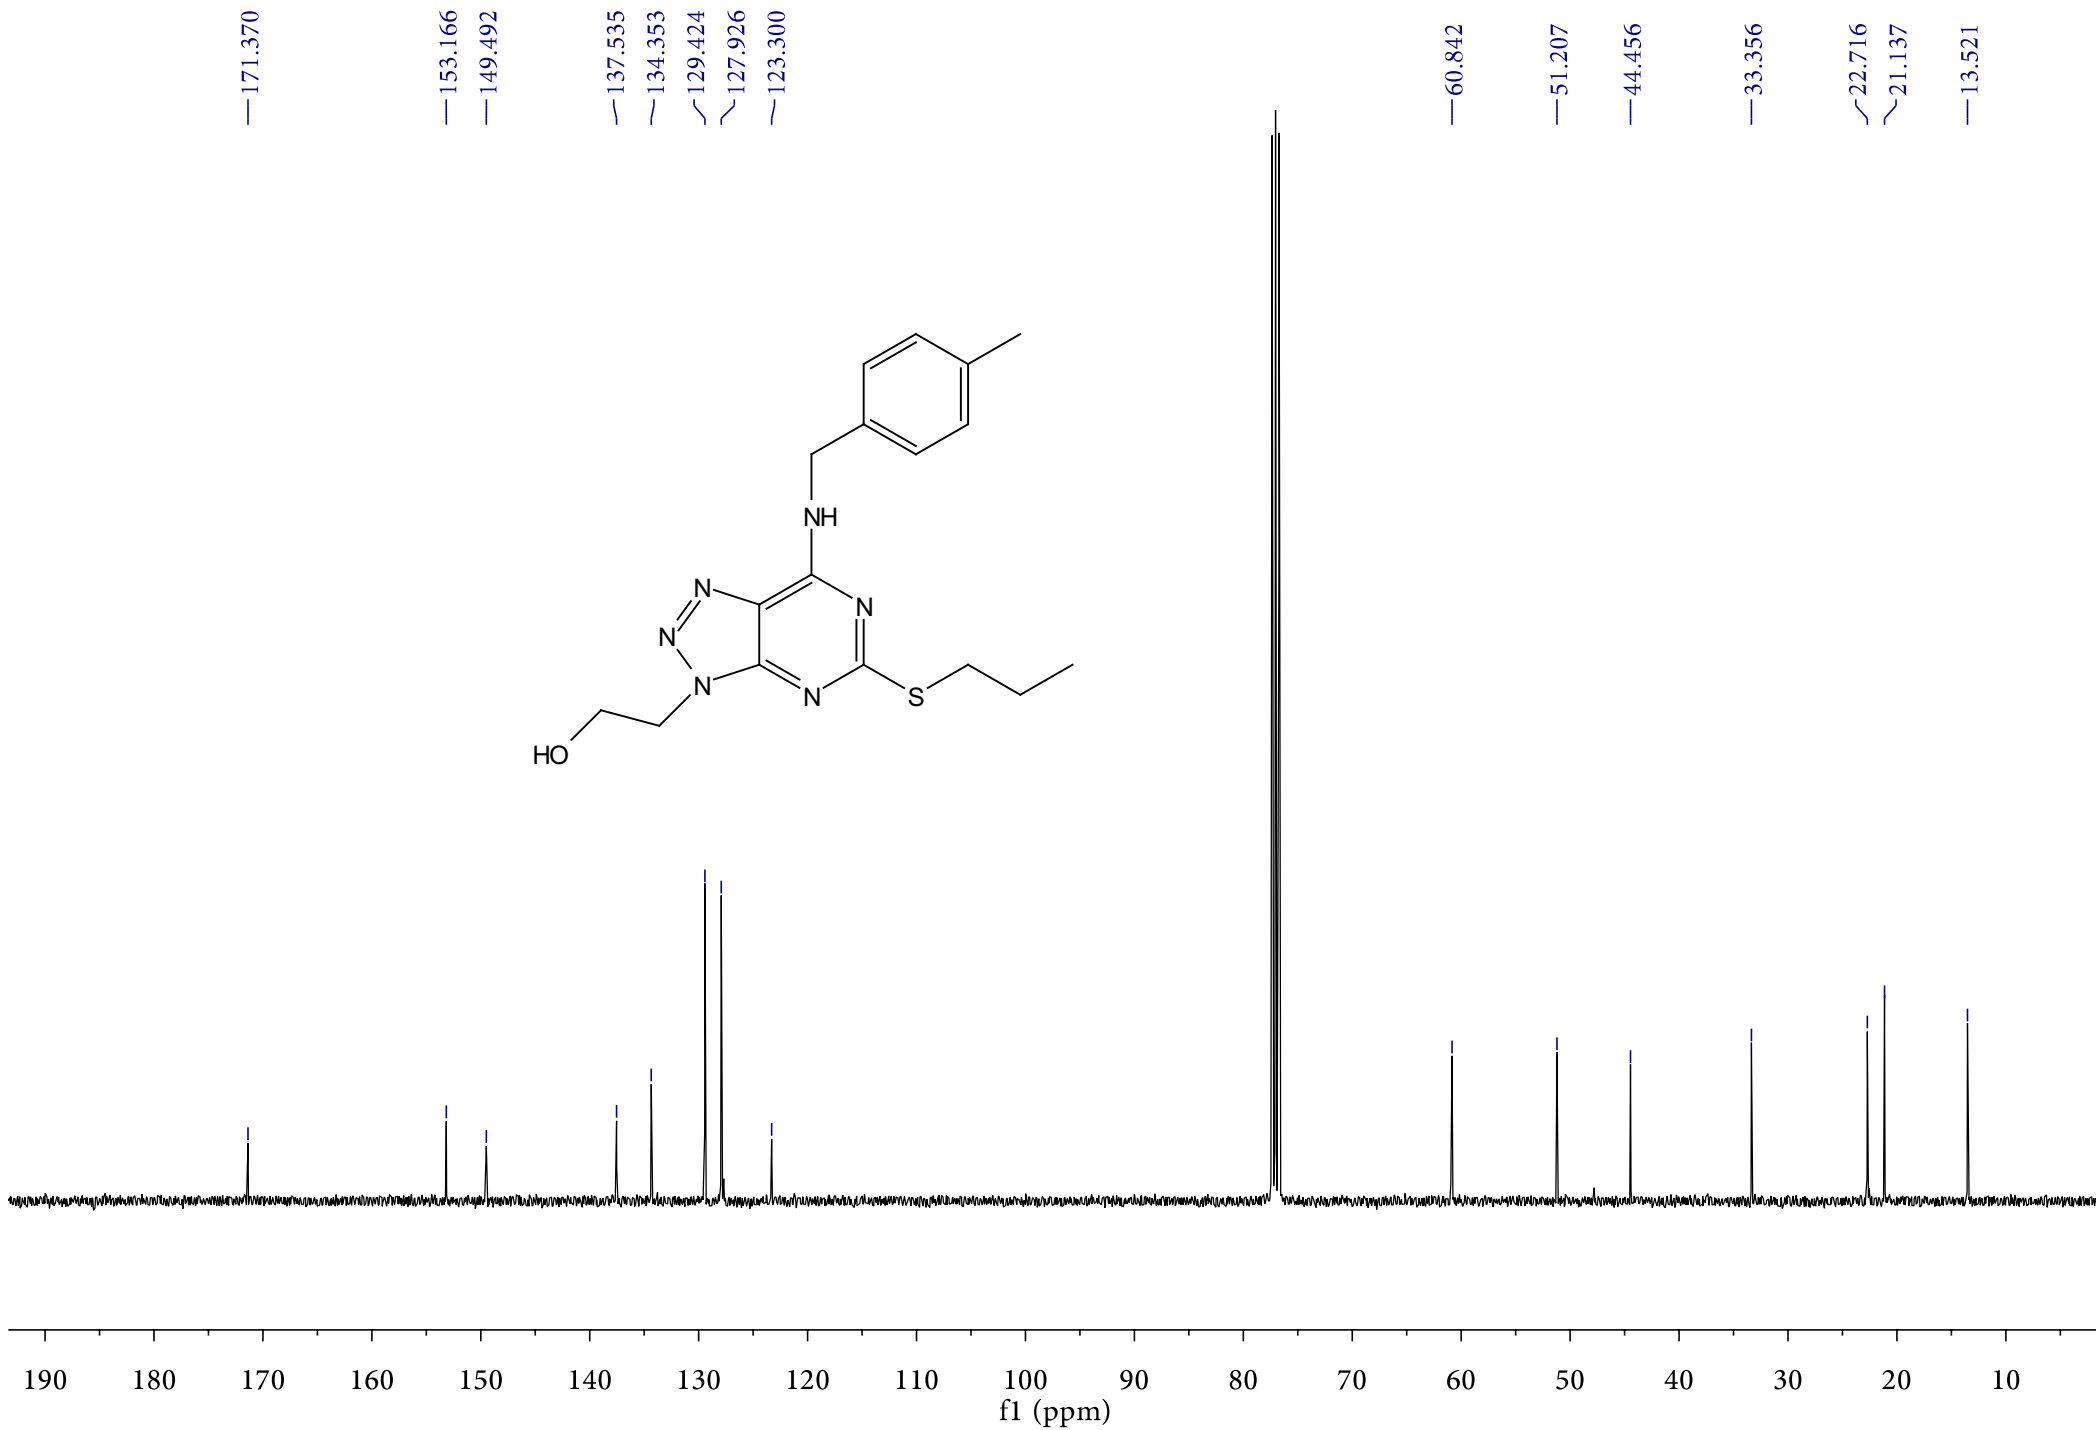

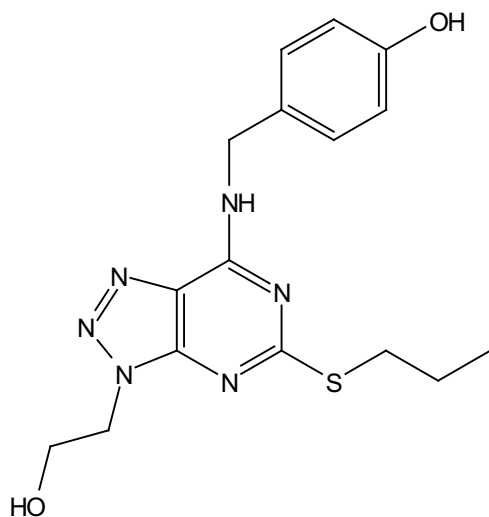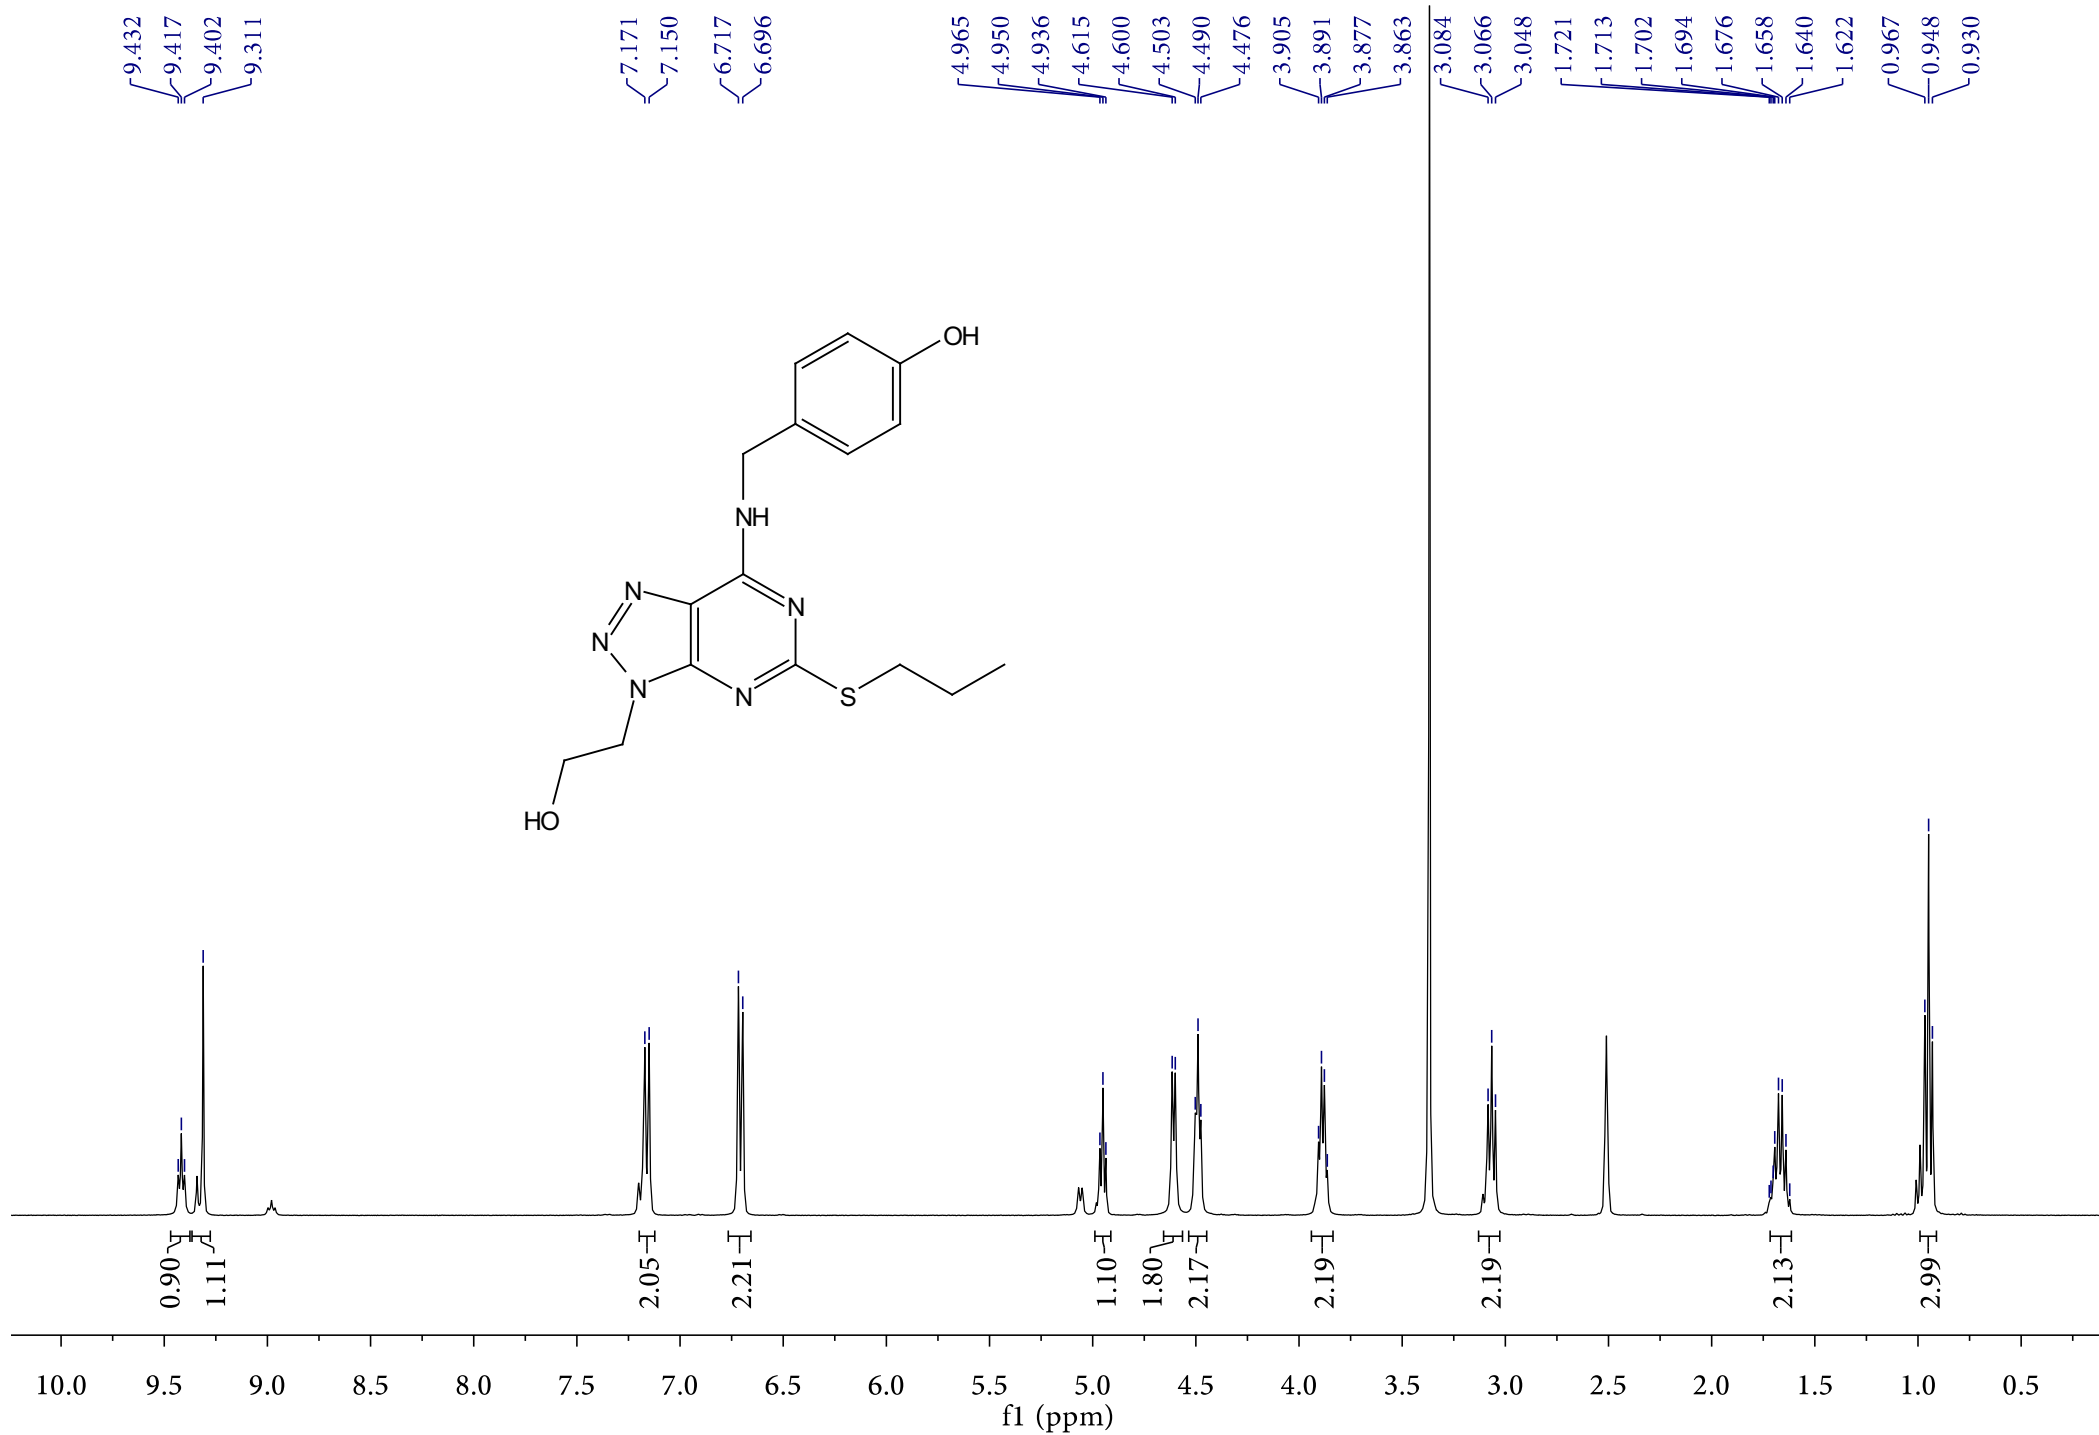

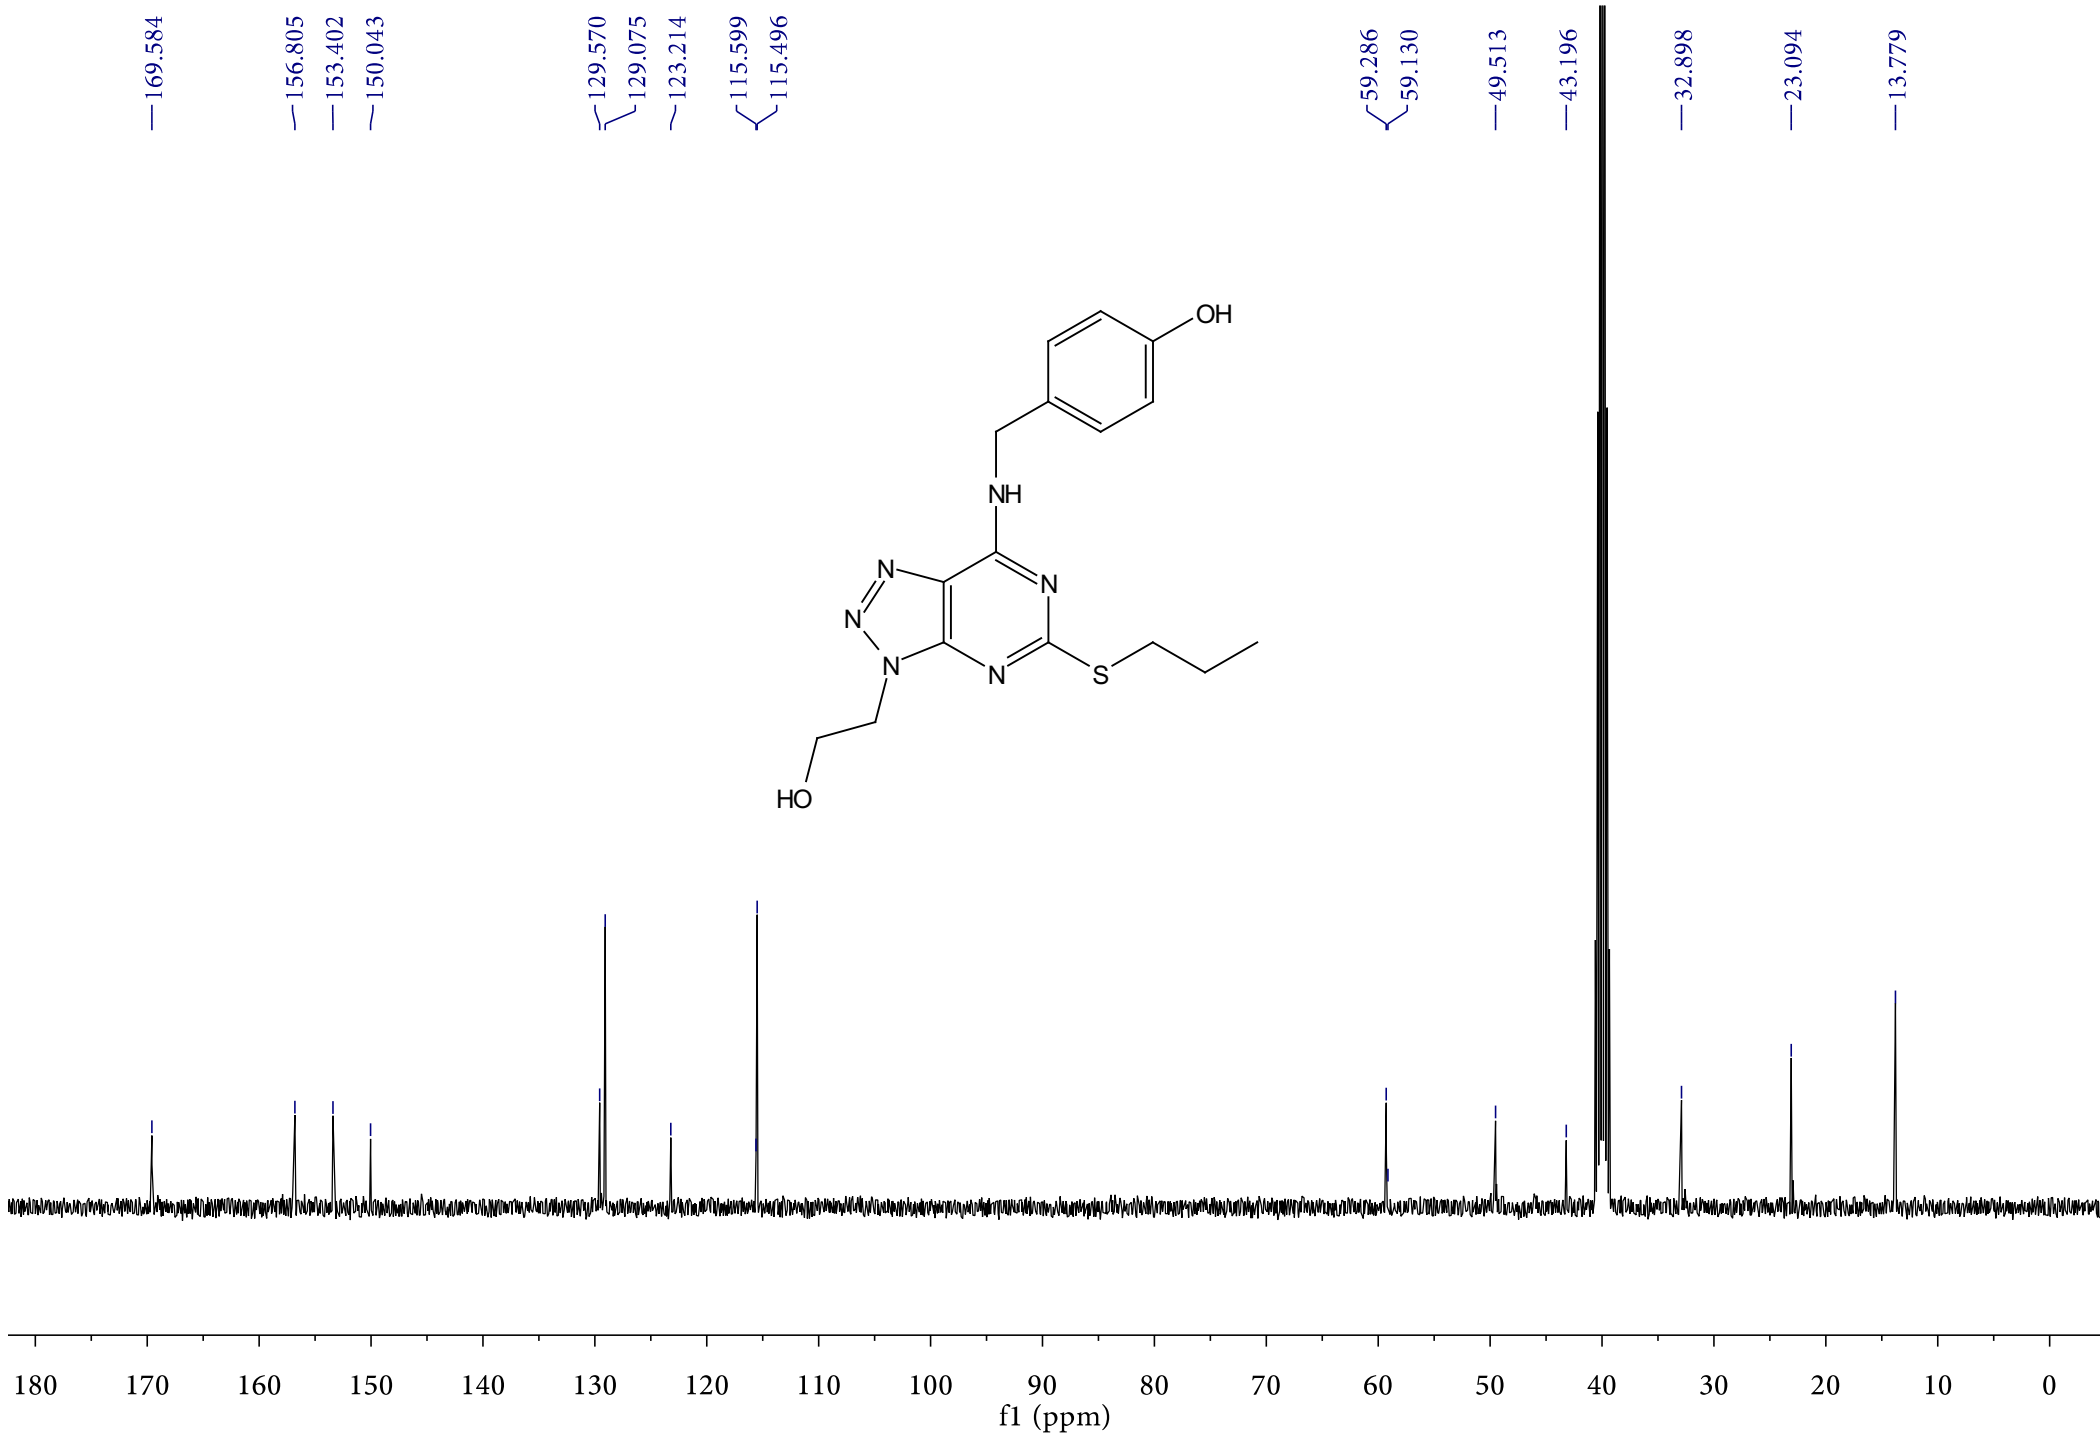



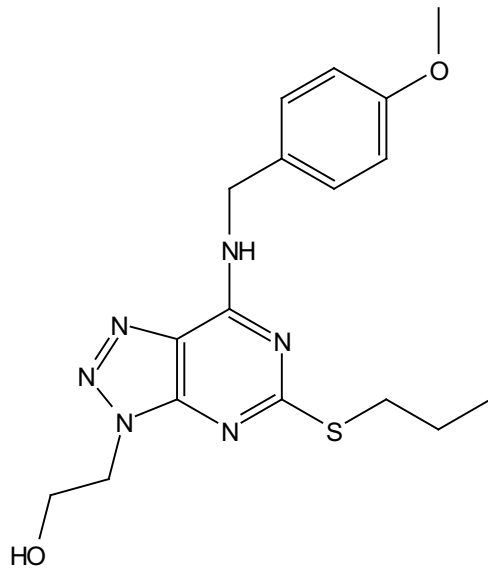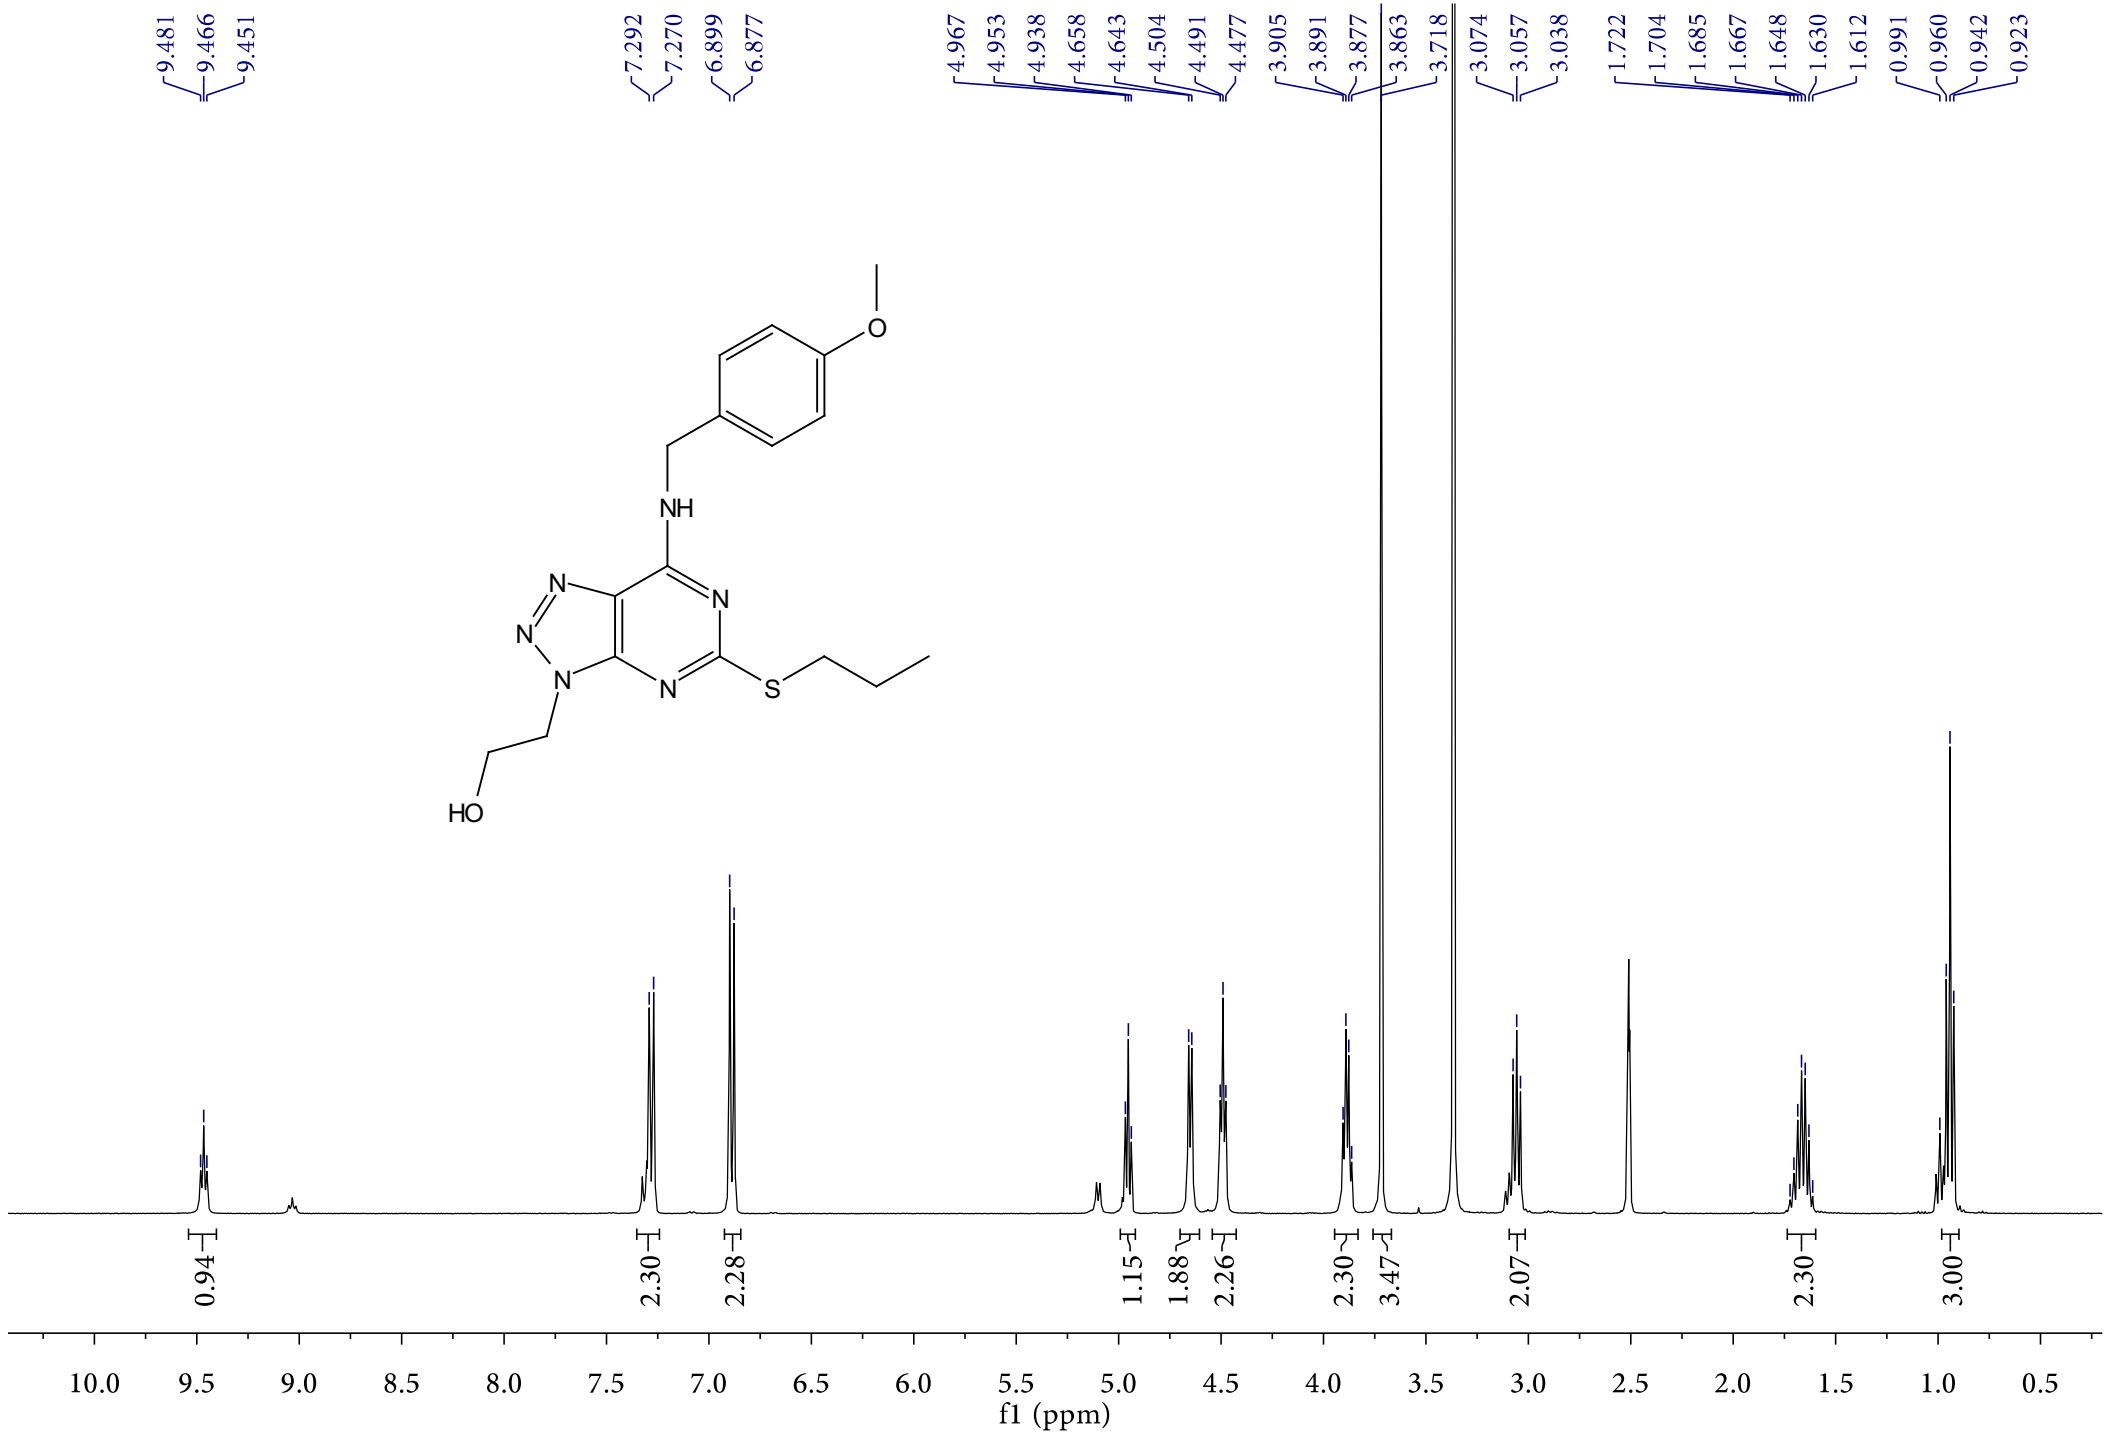

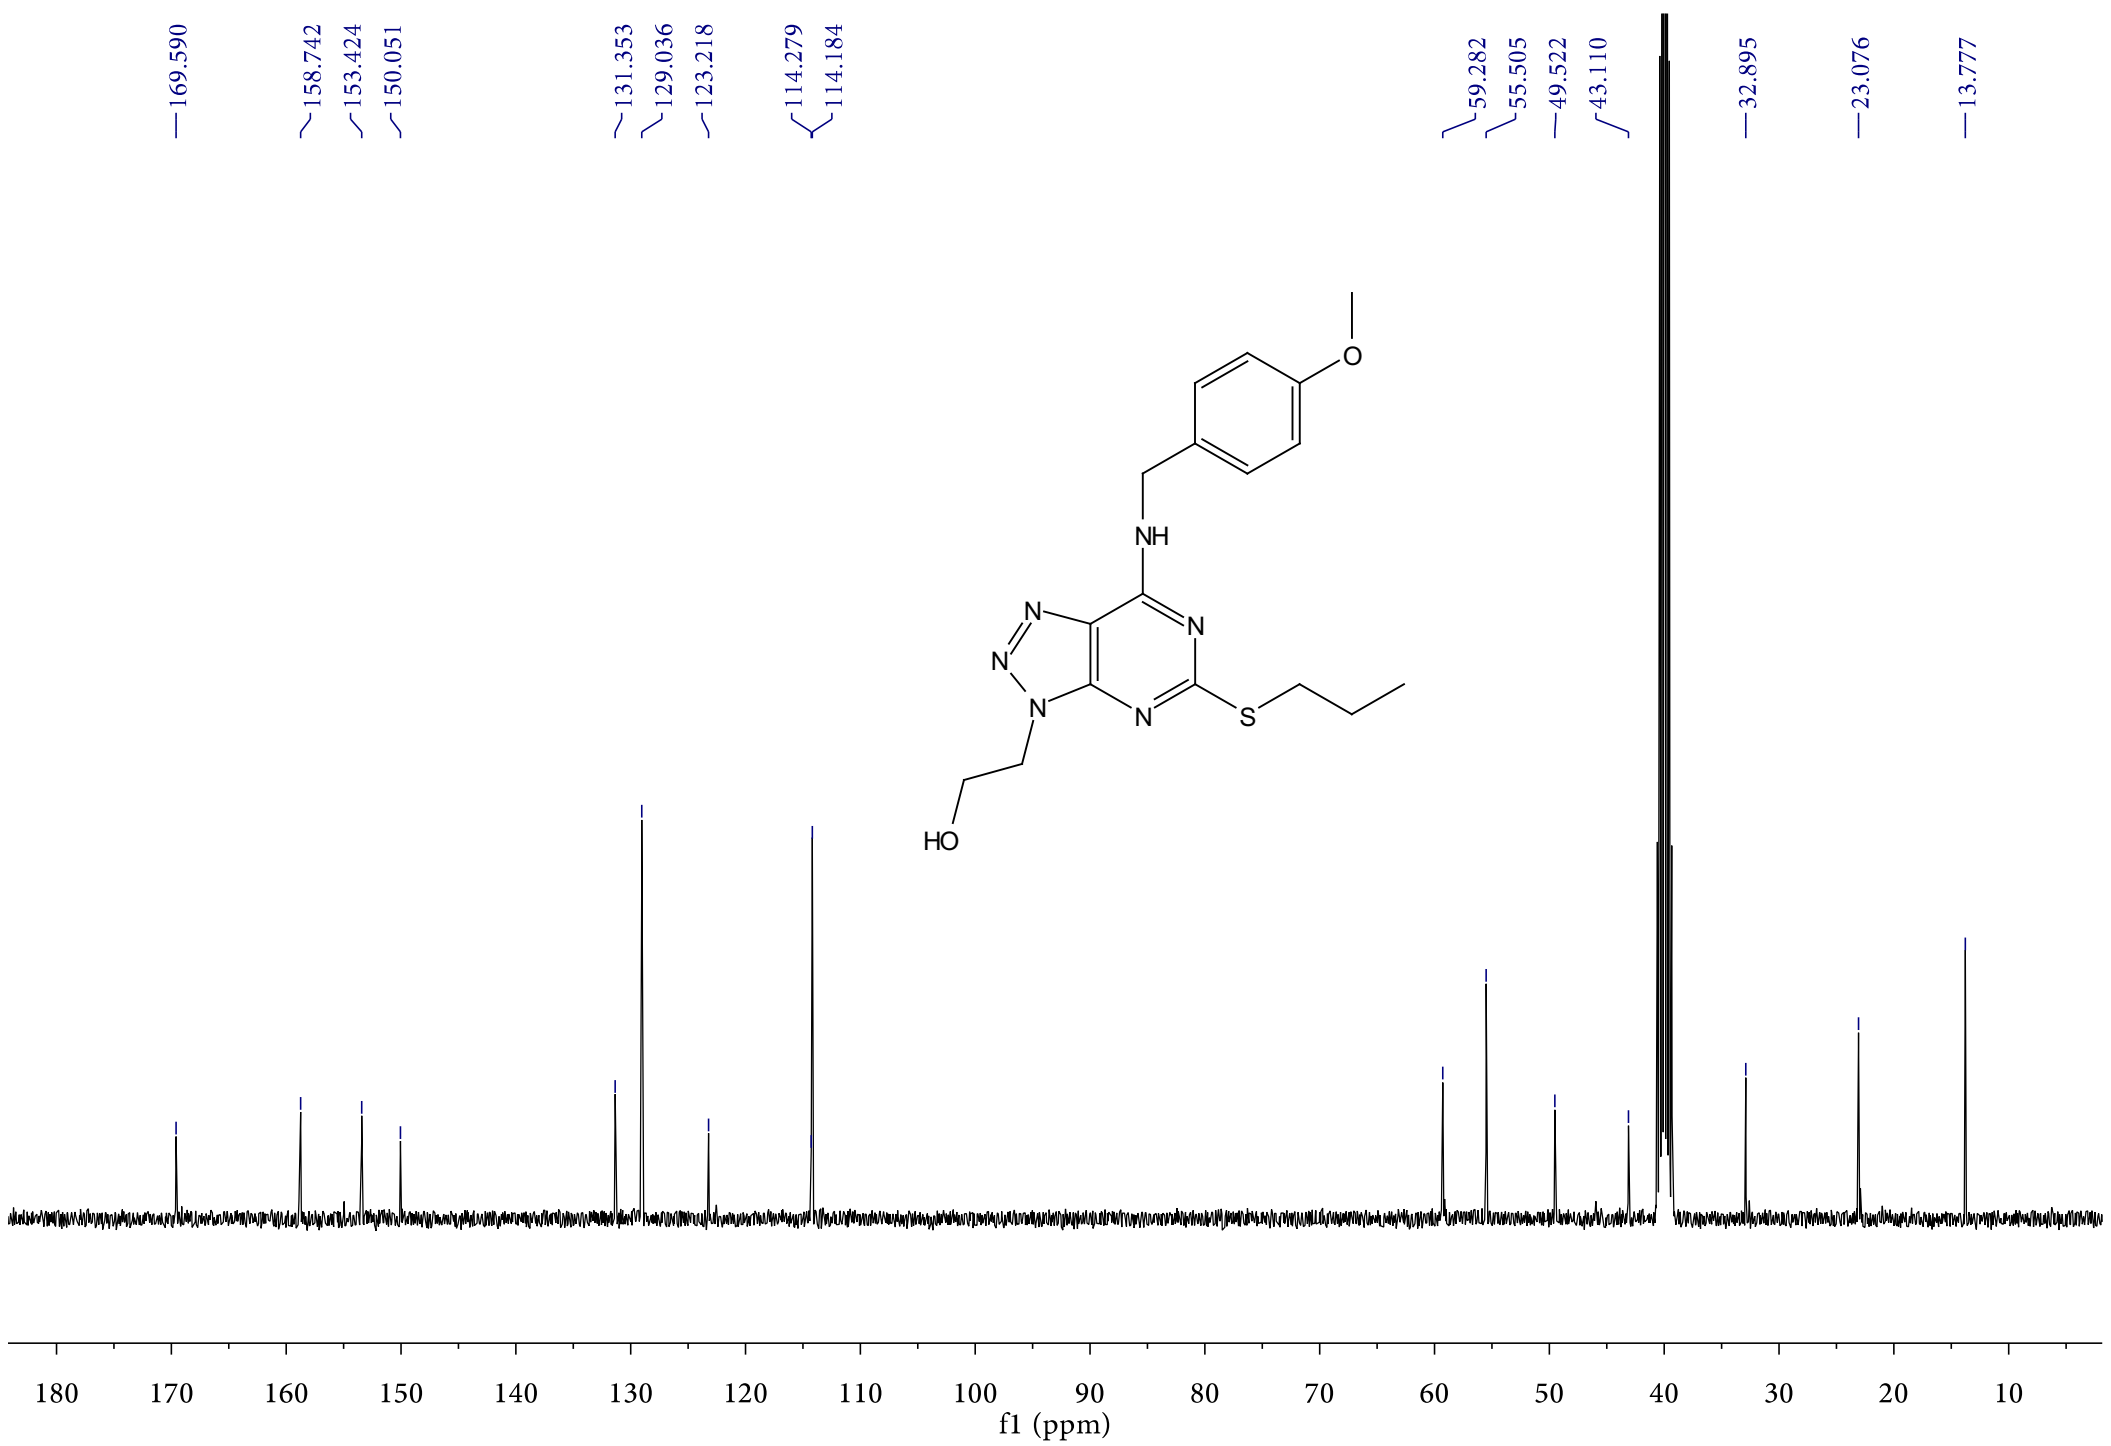

7.372  
7.361  
7.326  
7.317  
7.305

4.719  
4.708  
4.696  
4.663  
4.506  
4.146  
4.136  
4.127  
4.087  
3.595

3.110  
3.092  
3.074  
2.665  
2.654  
2.595  
2.584

1.811  
1.793  
1.775  
1.756

1.083  
1.065  
1.046

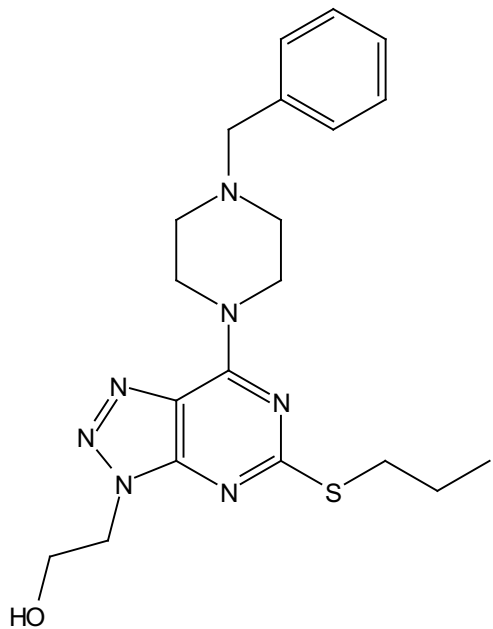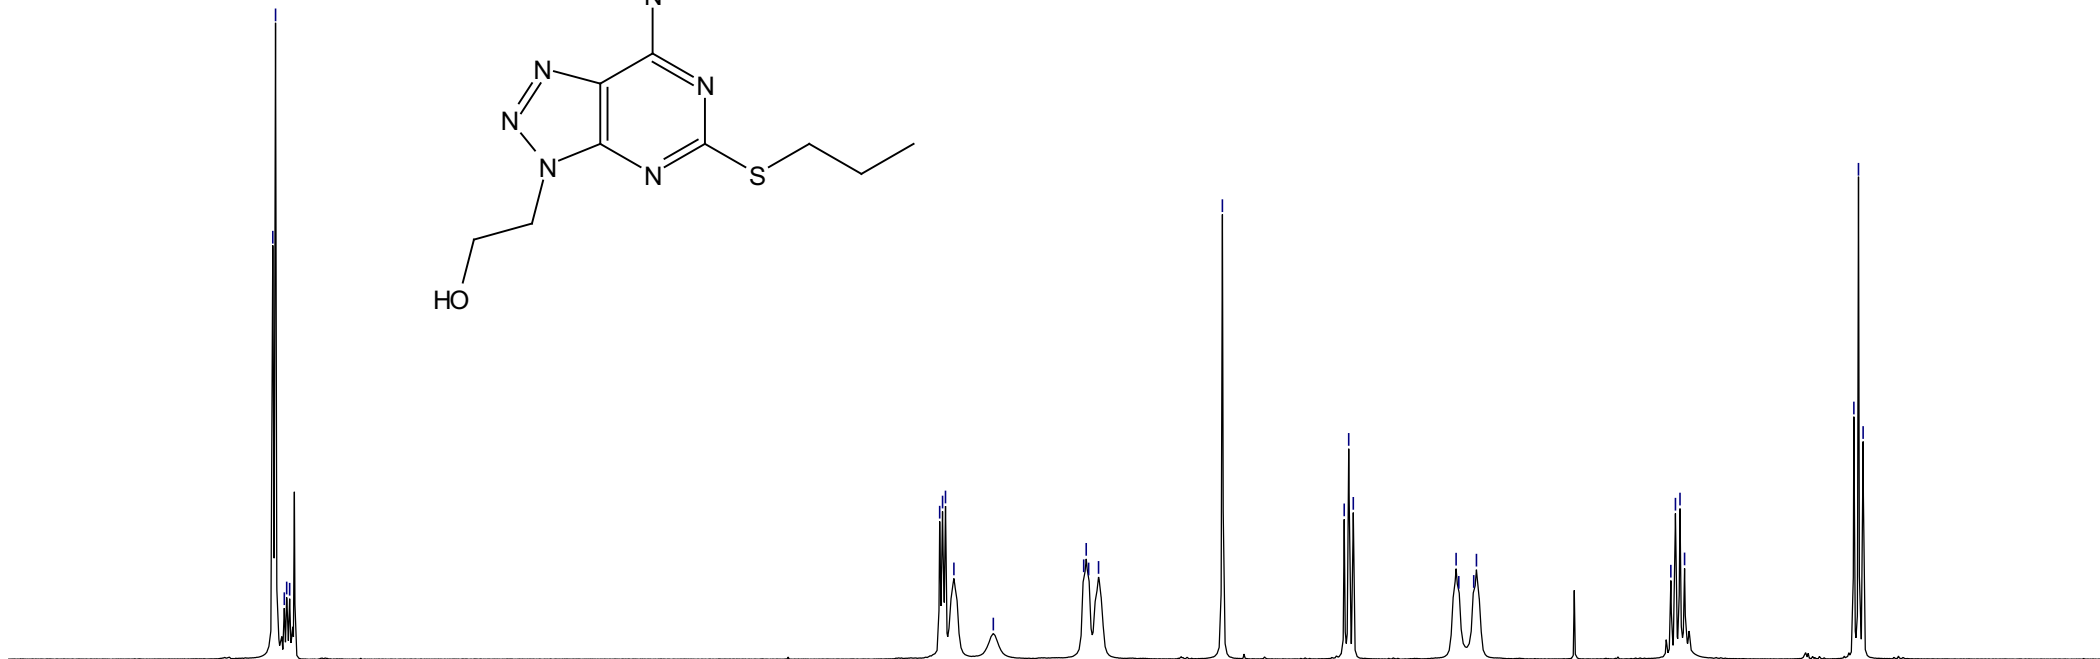

8.0 7.5 7.0 6.5 6.0 5.5 5.0 4.5 4.0 3.5 3.0 2.5 2.0 1.5 1.0 0.5

f1 (ppm)

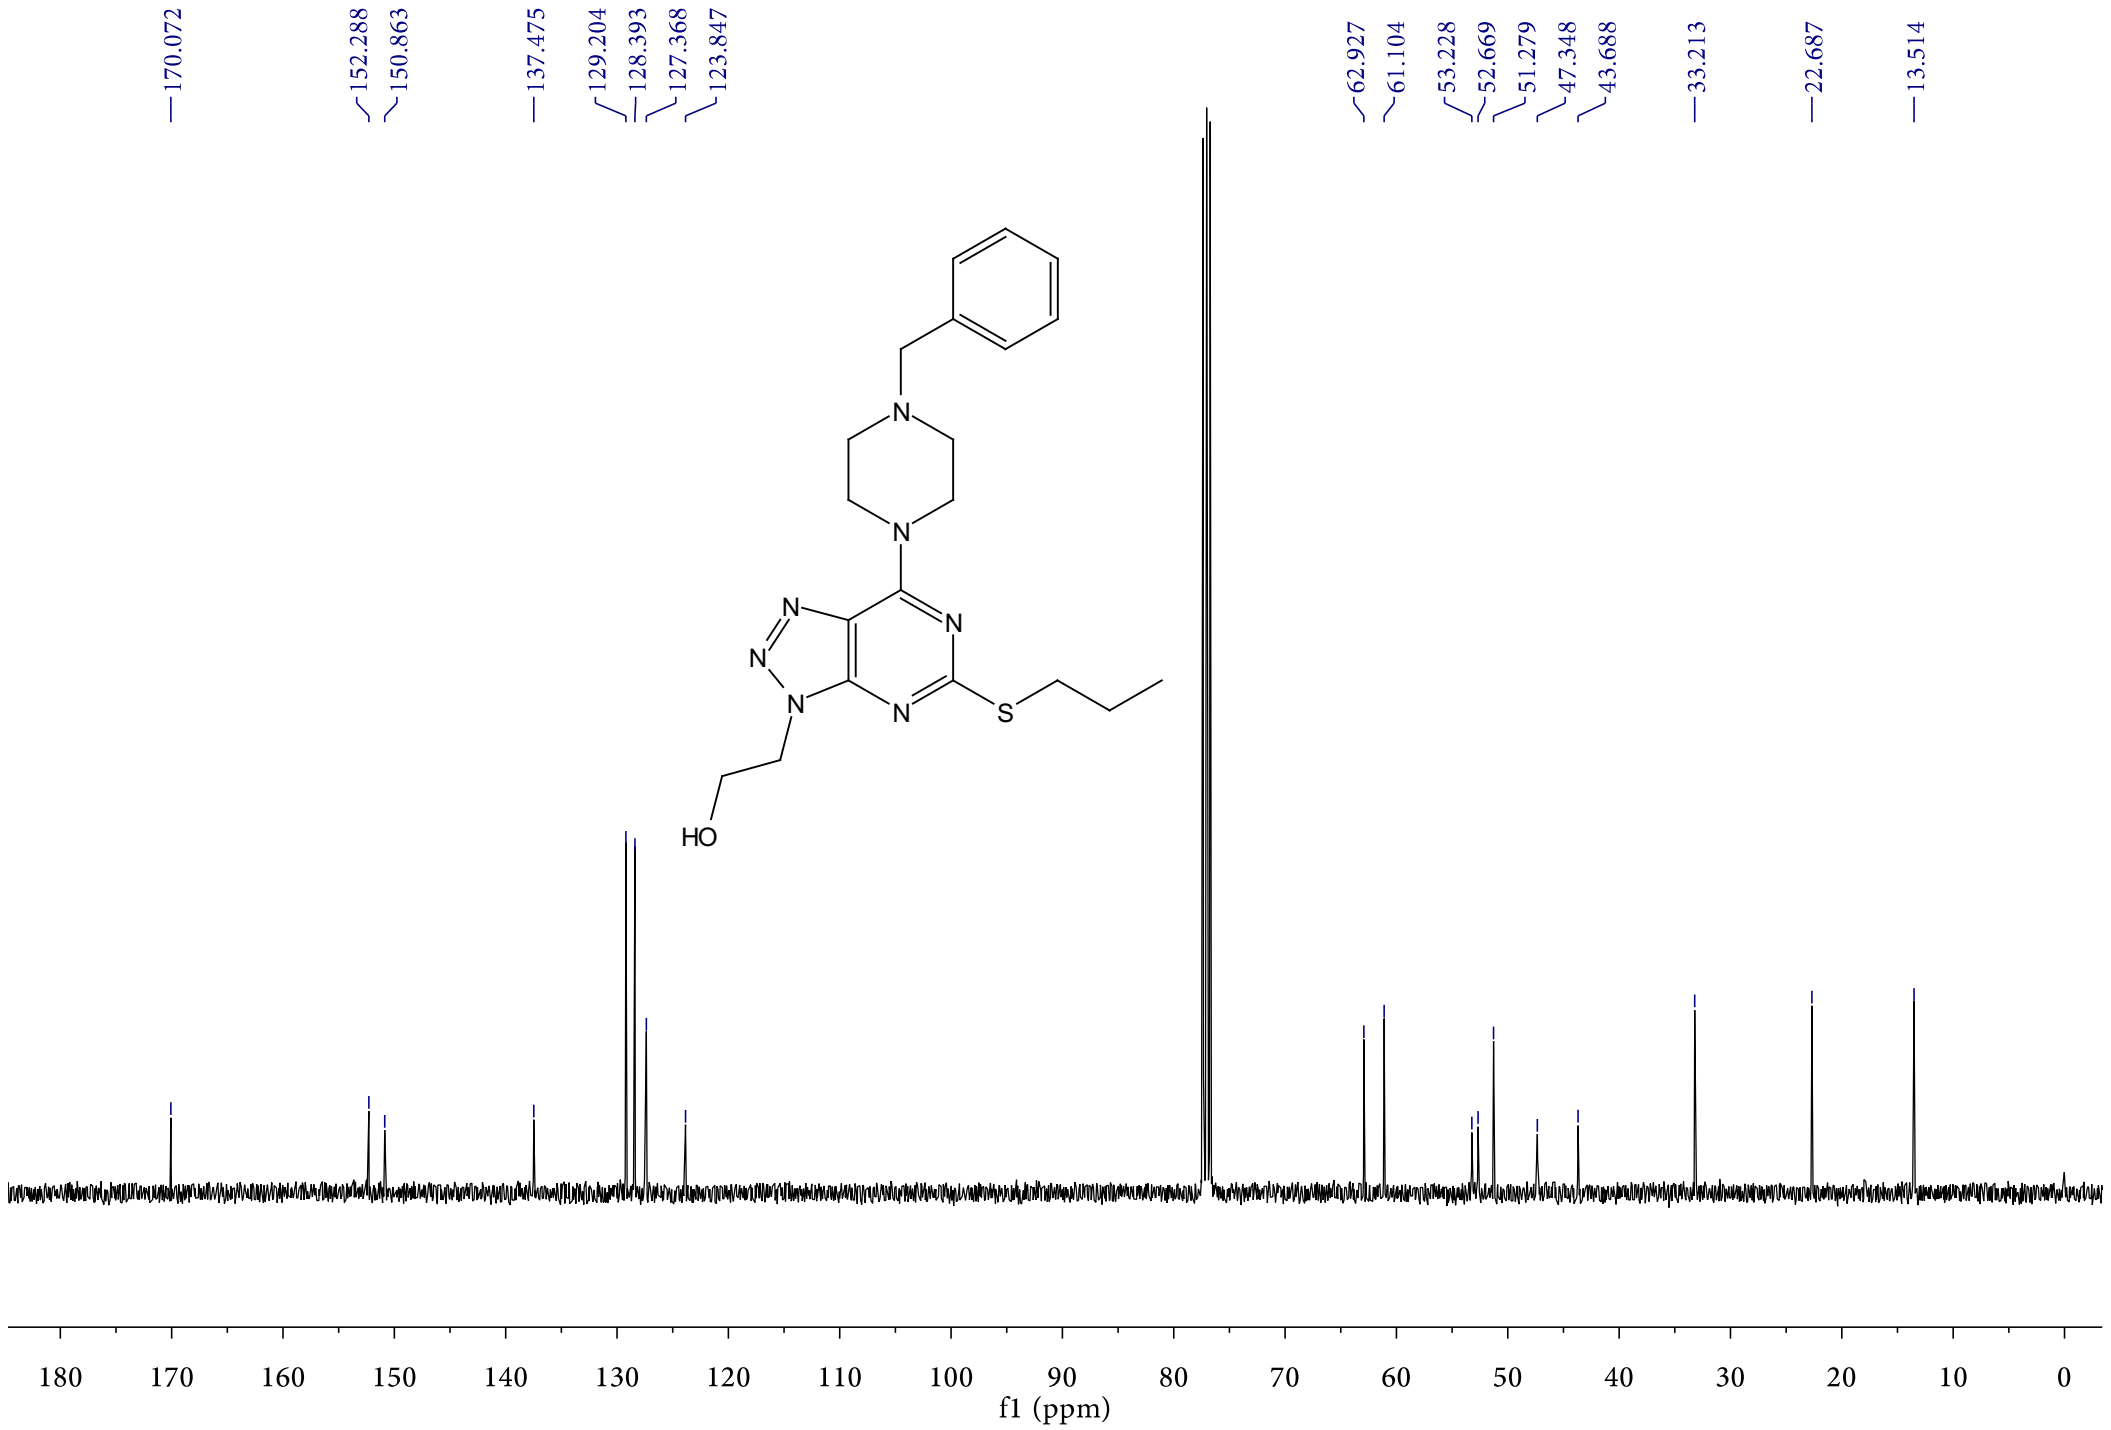

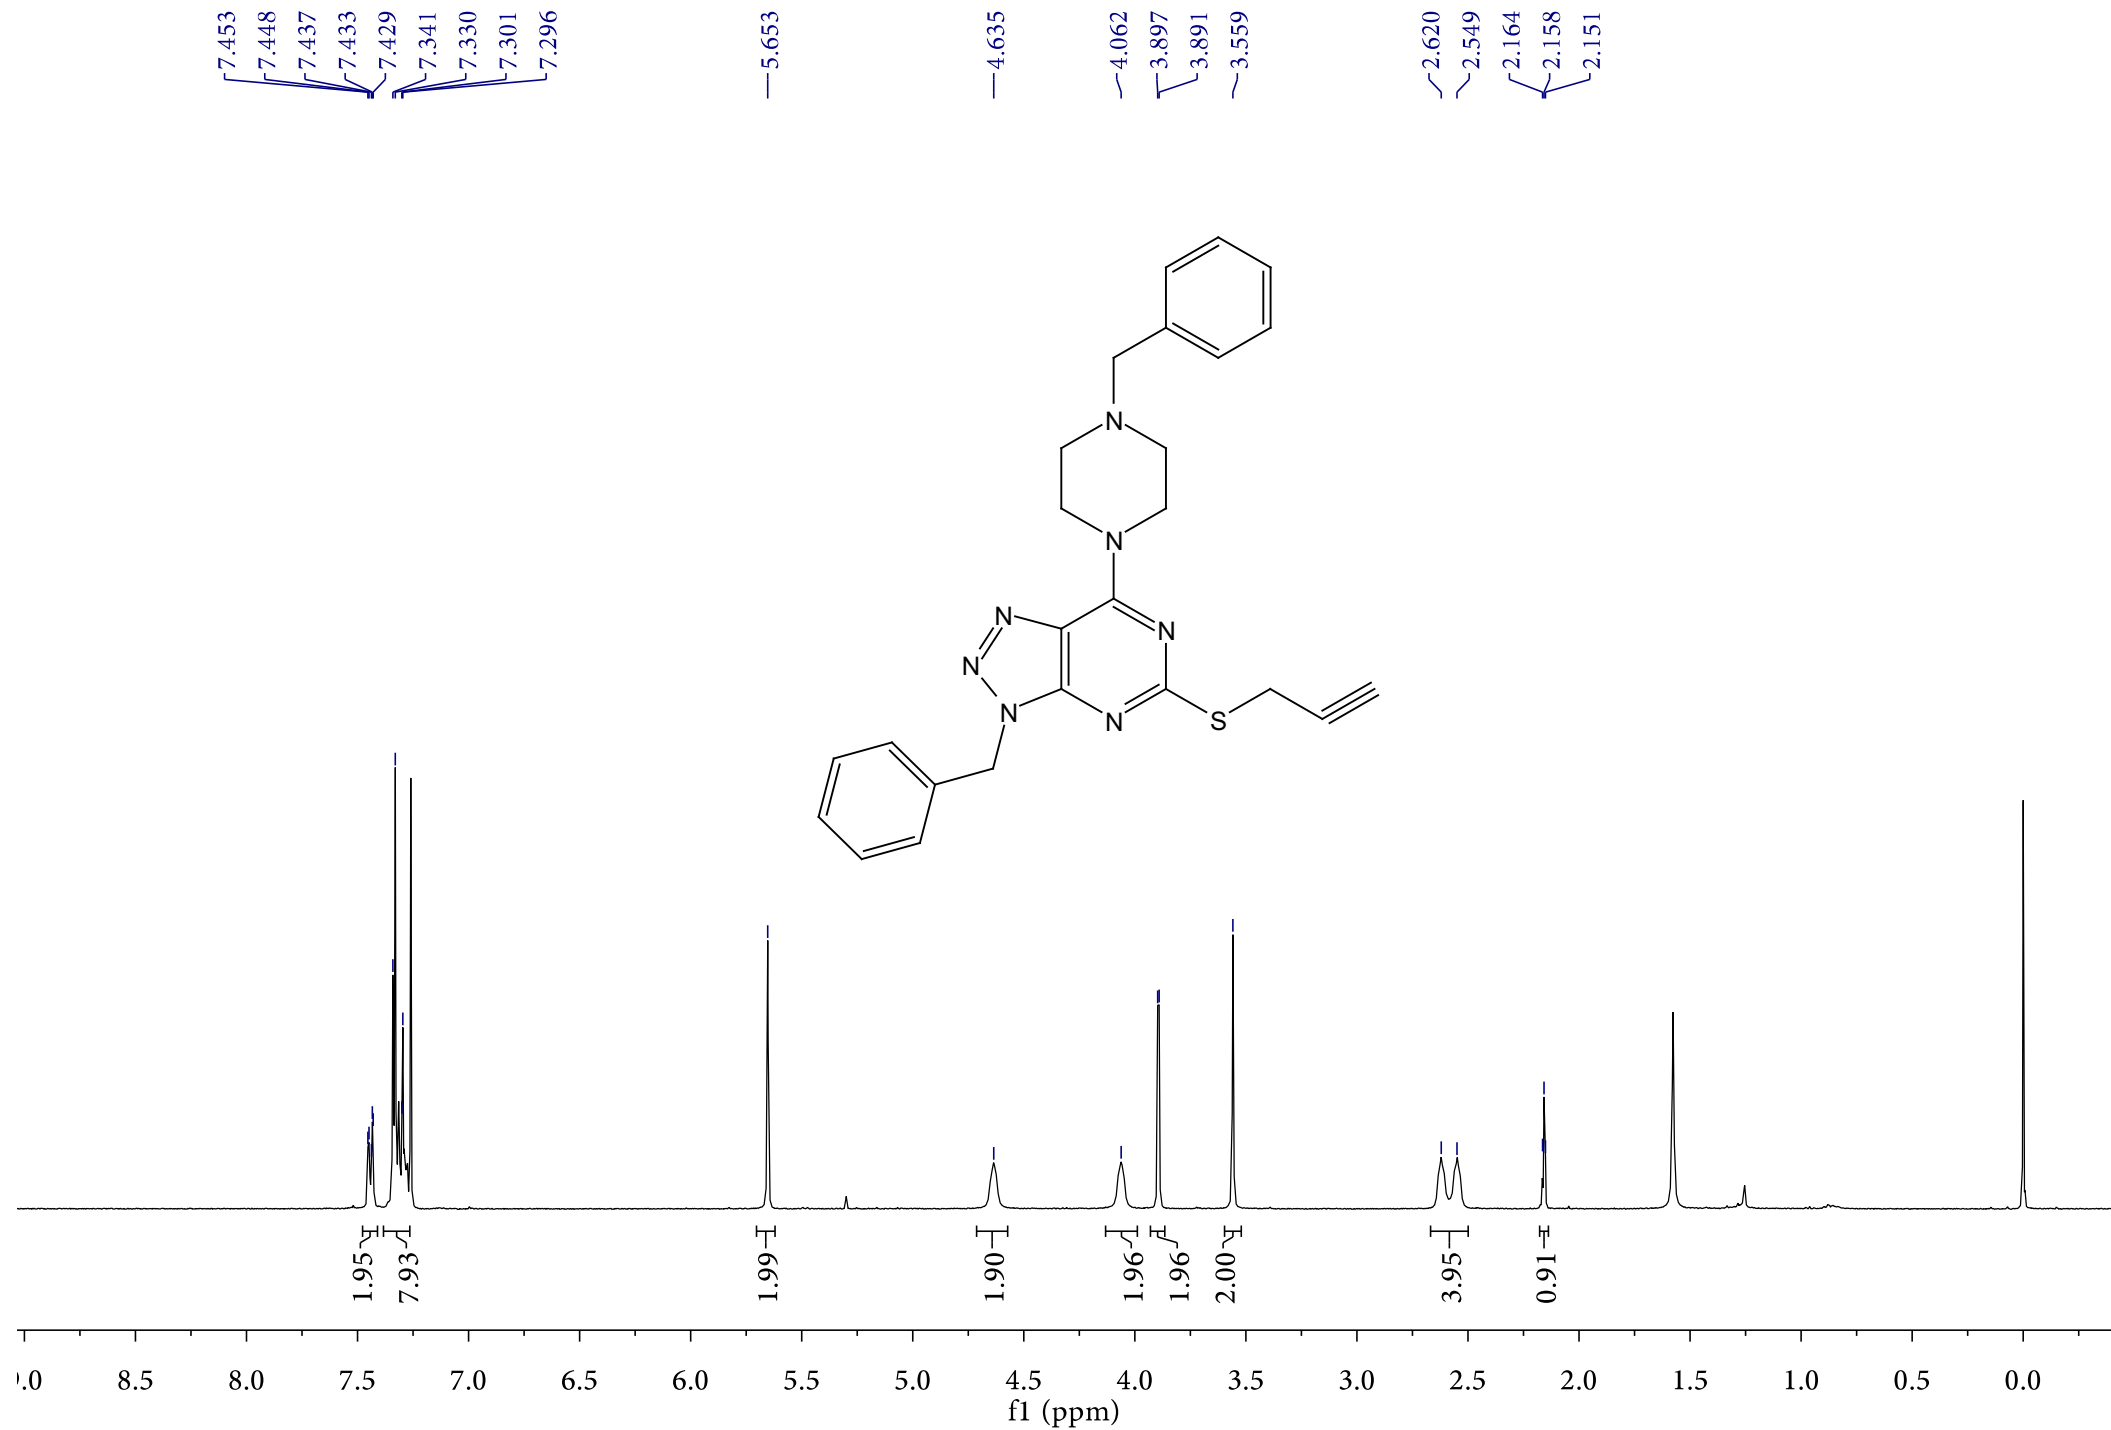

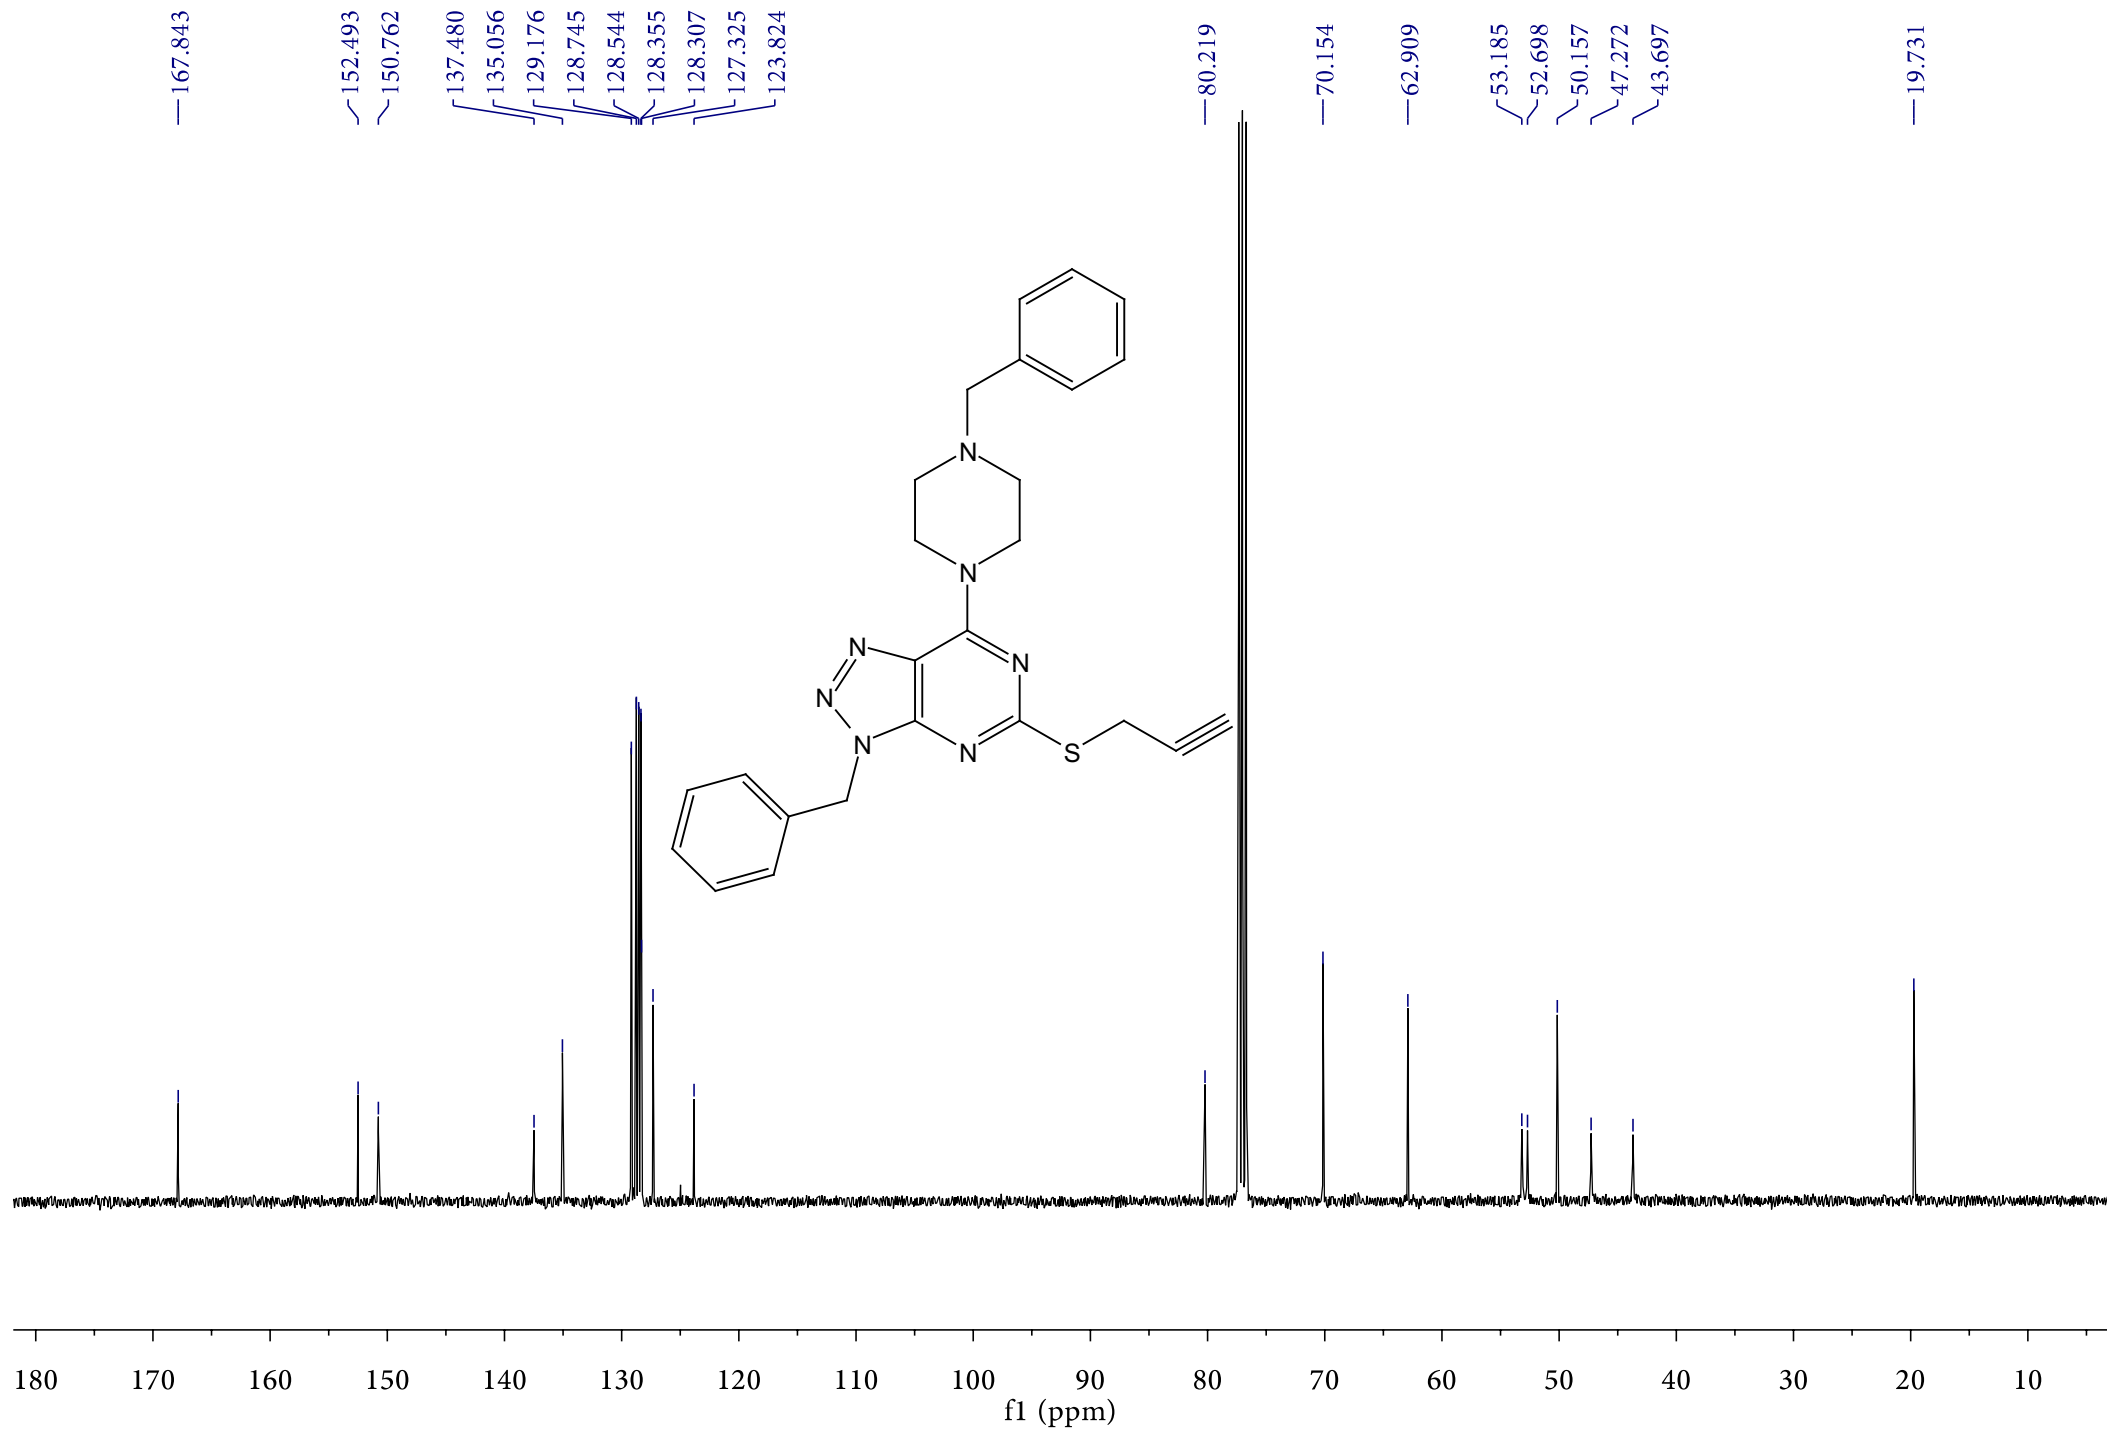

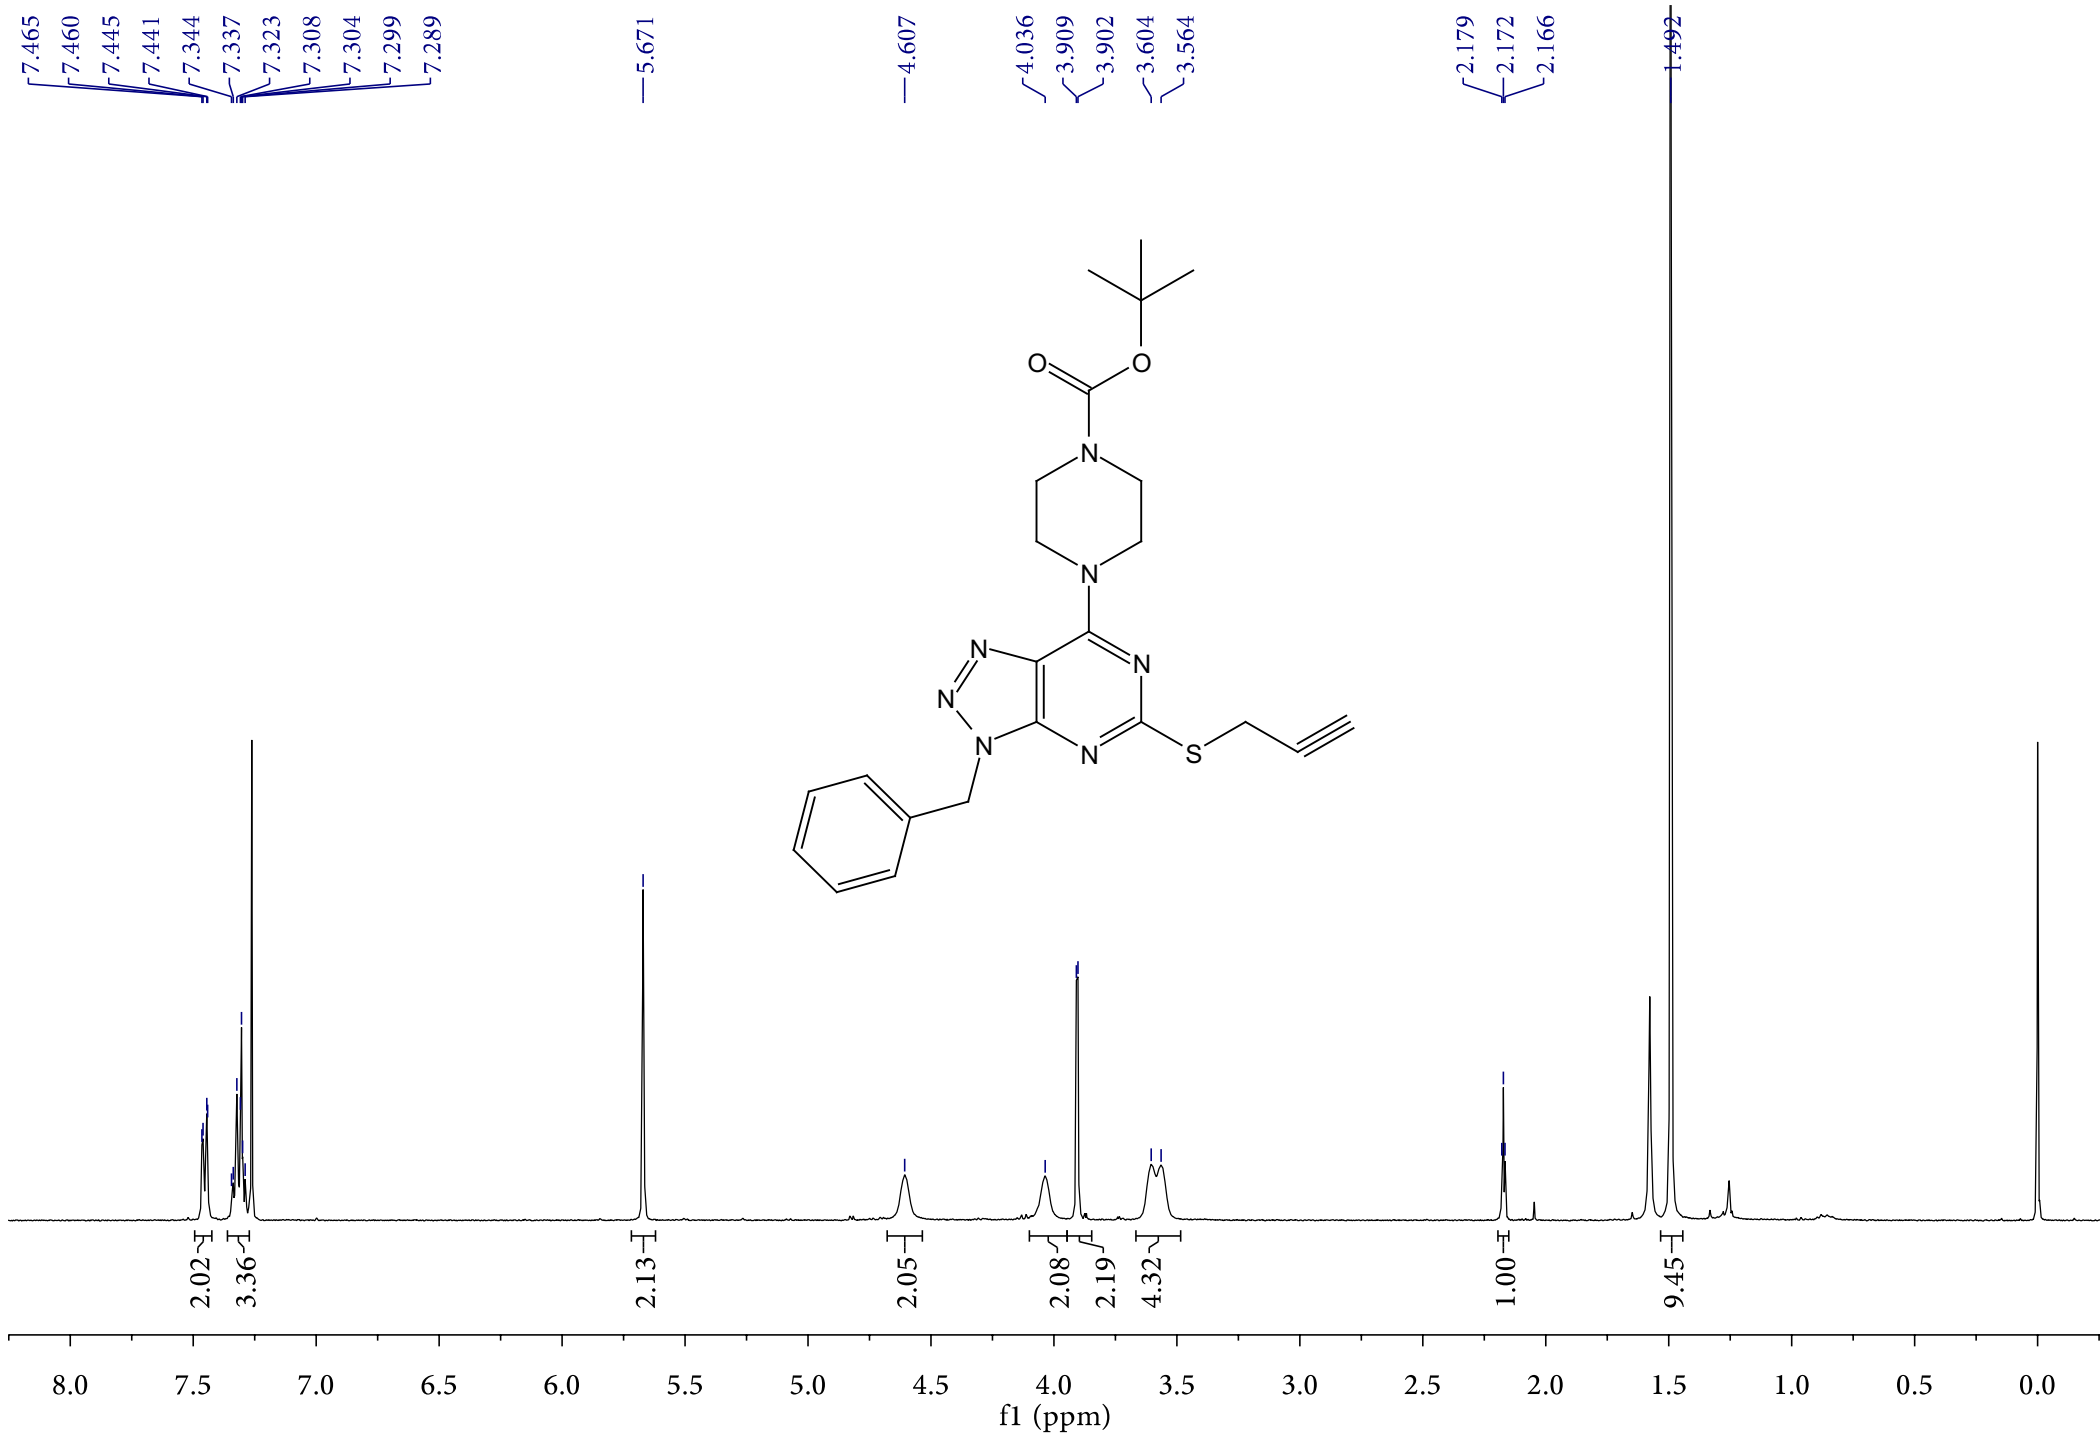

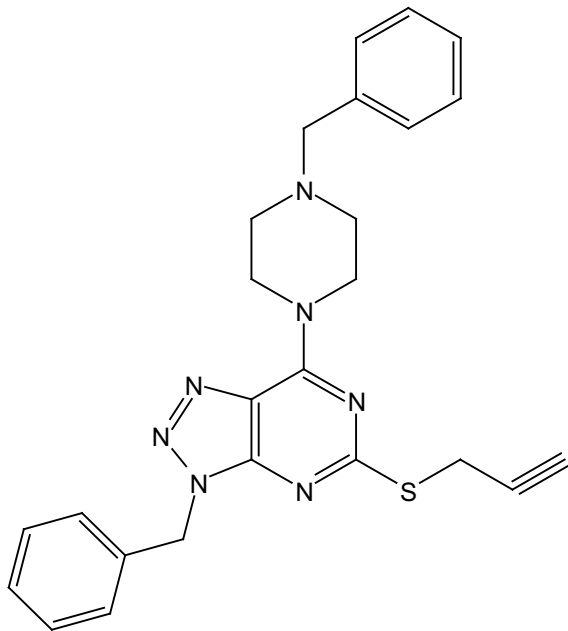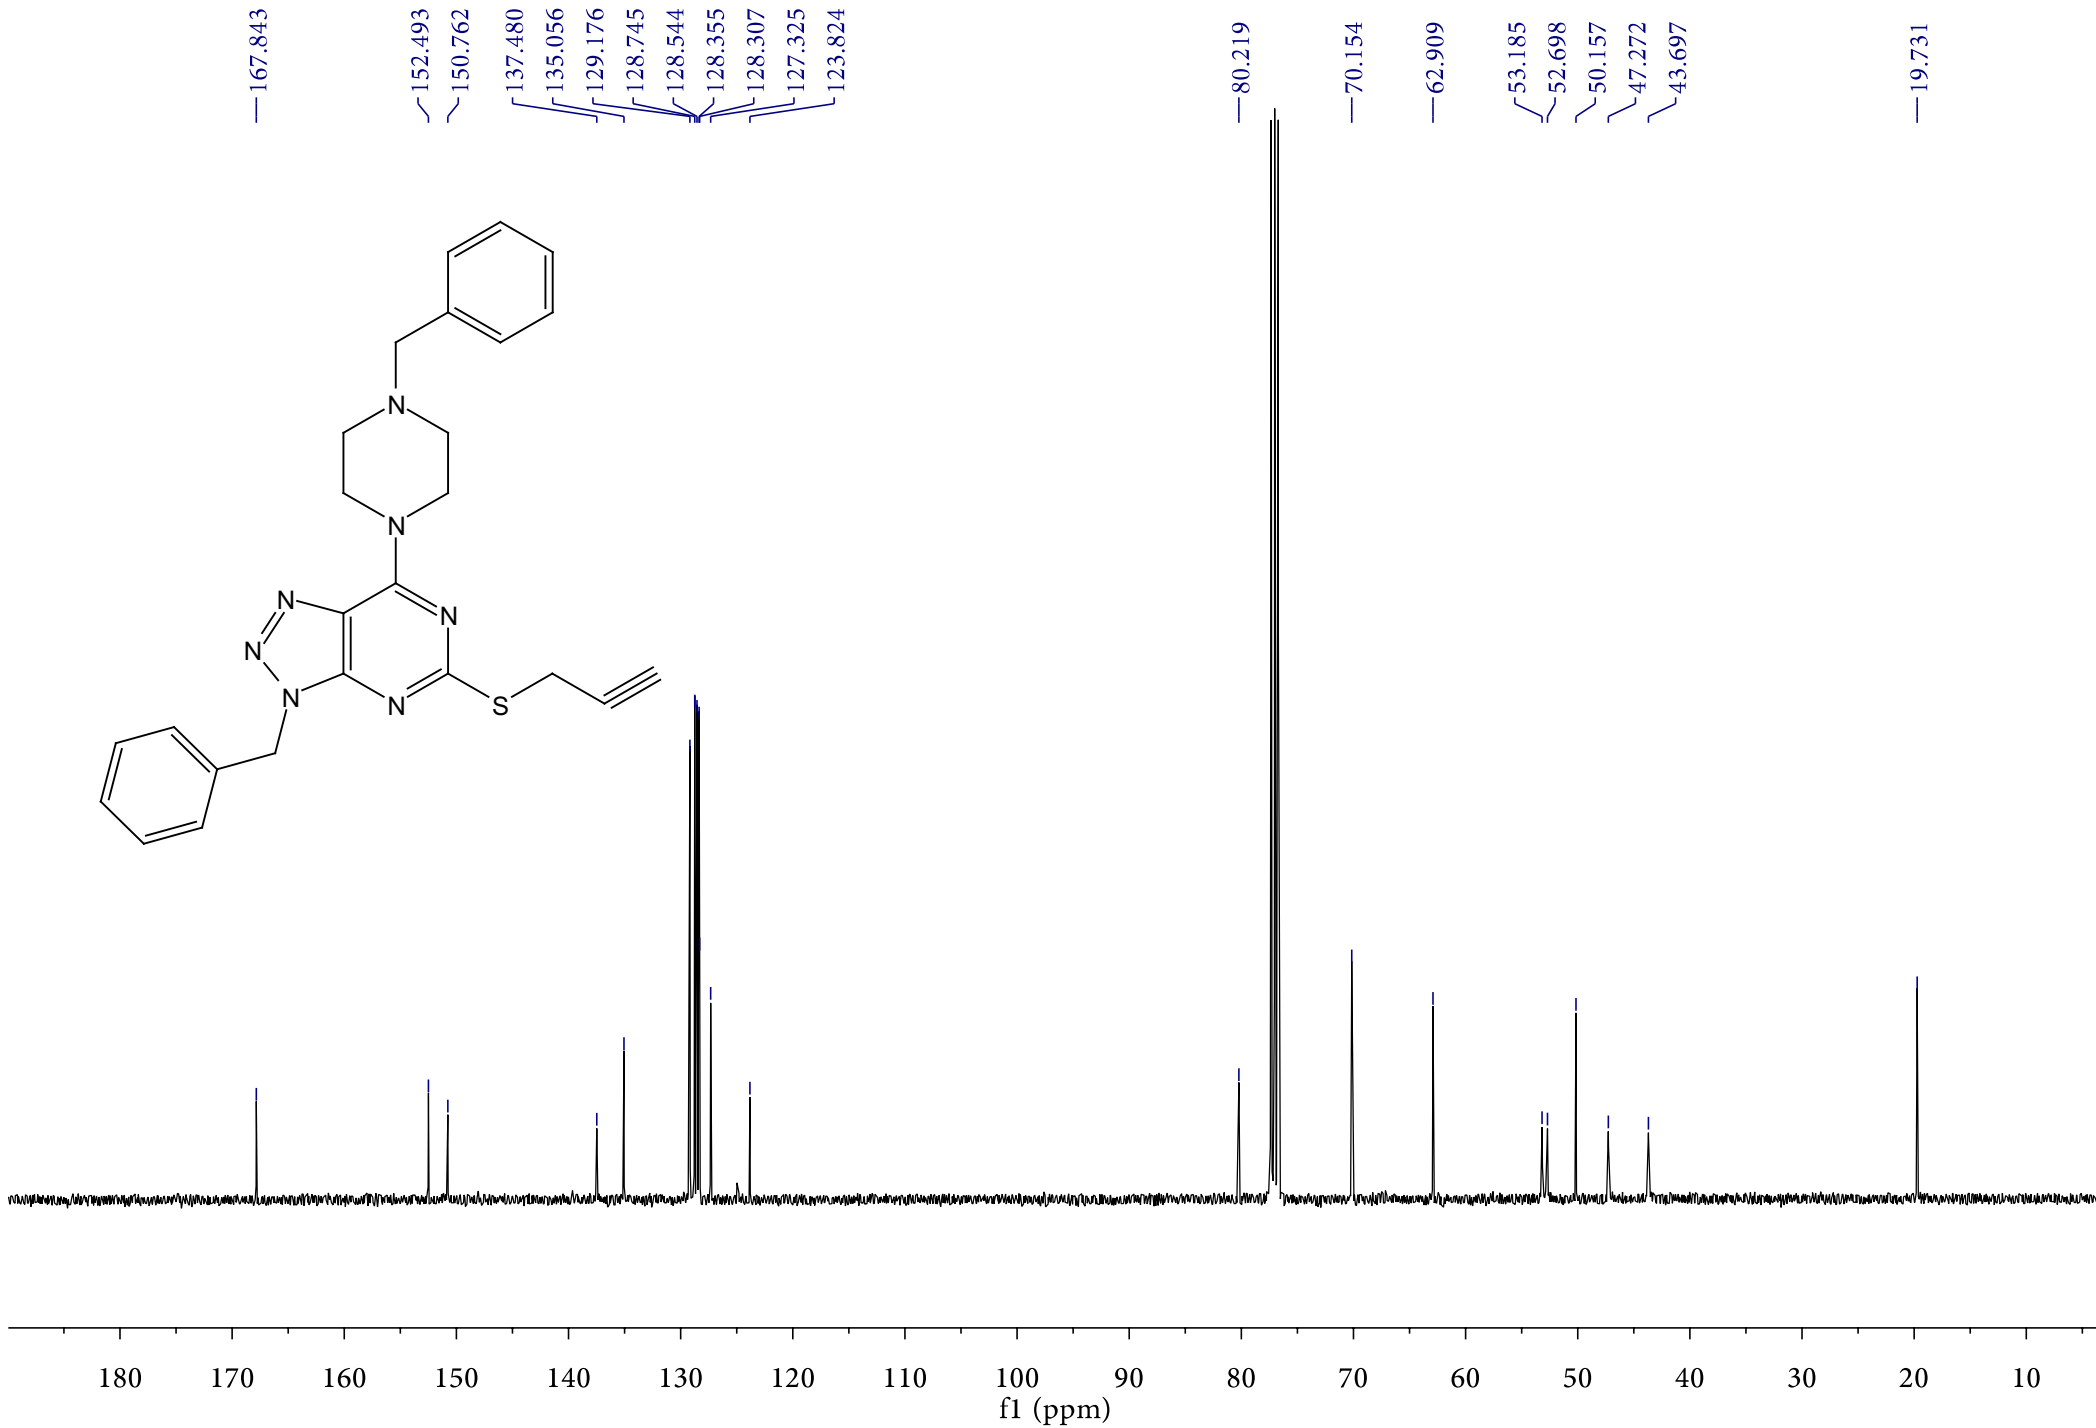



7.423  
7.417  
7.403  
7.397  
7.382  
7.377  
7.331  
7.307  
7.205  
7.184

4.798  
4.790  
4.778  
4.768  
4.229  
4.217  
4.205

3.333  
3.318  
3.311  
3.297  
2.928  
2.921  
2.906  
2.890

1.628  
1.609  
1.590  
1.571

0.908  
0.896  
0.889

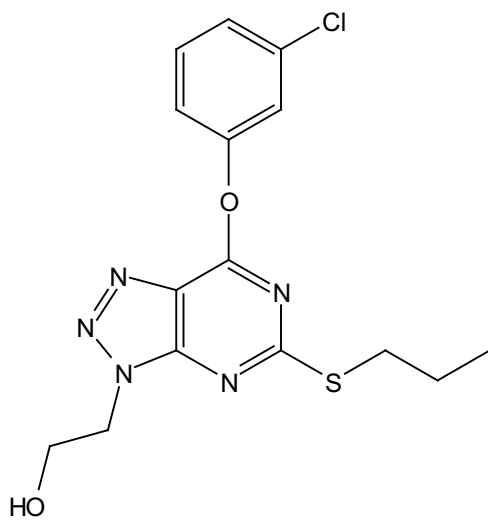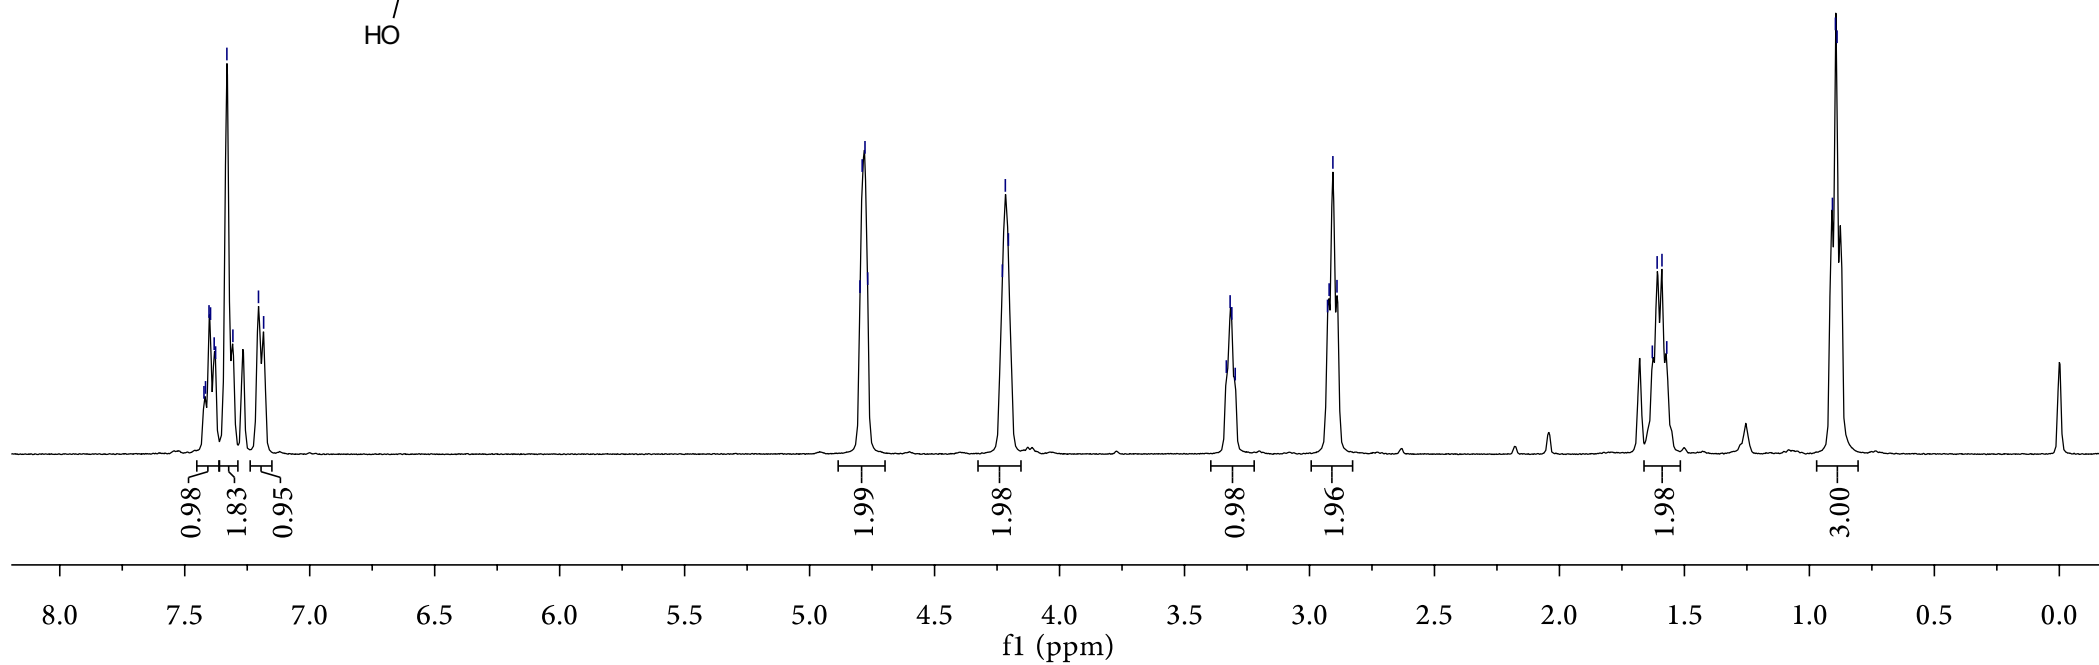

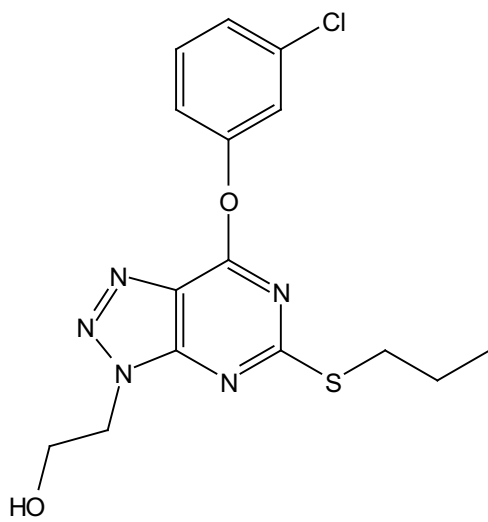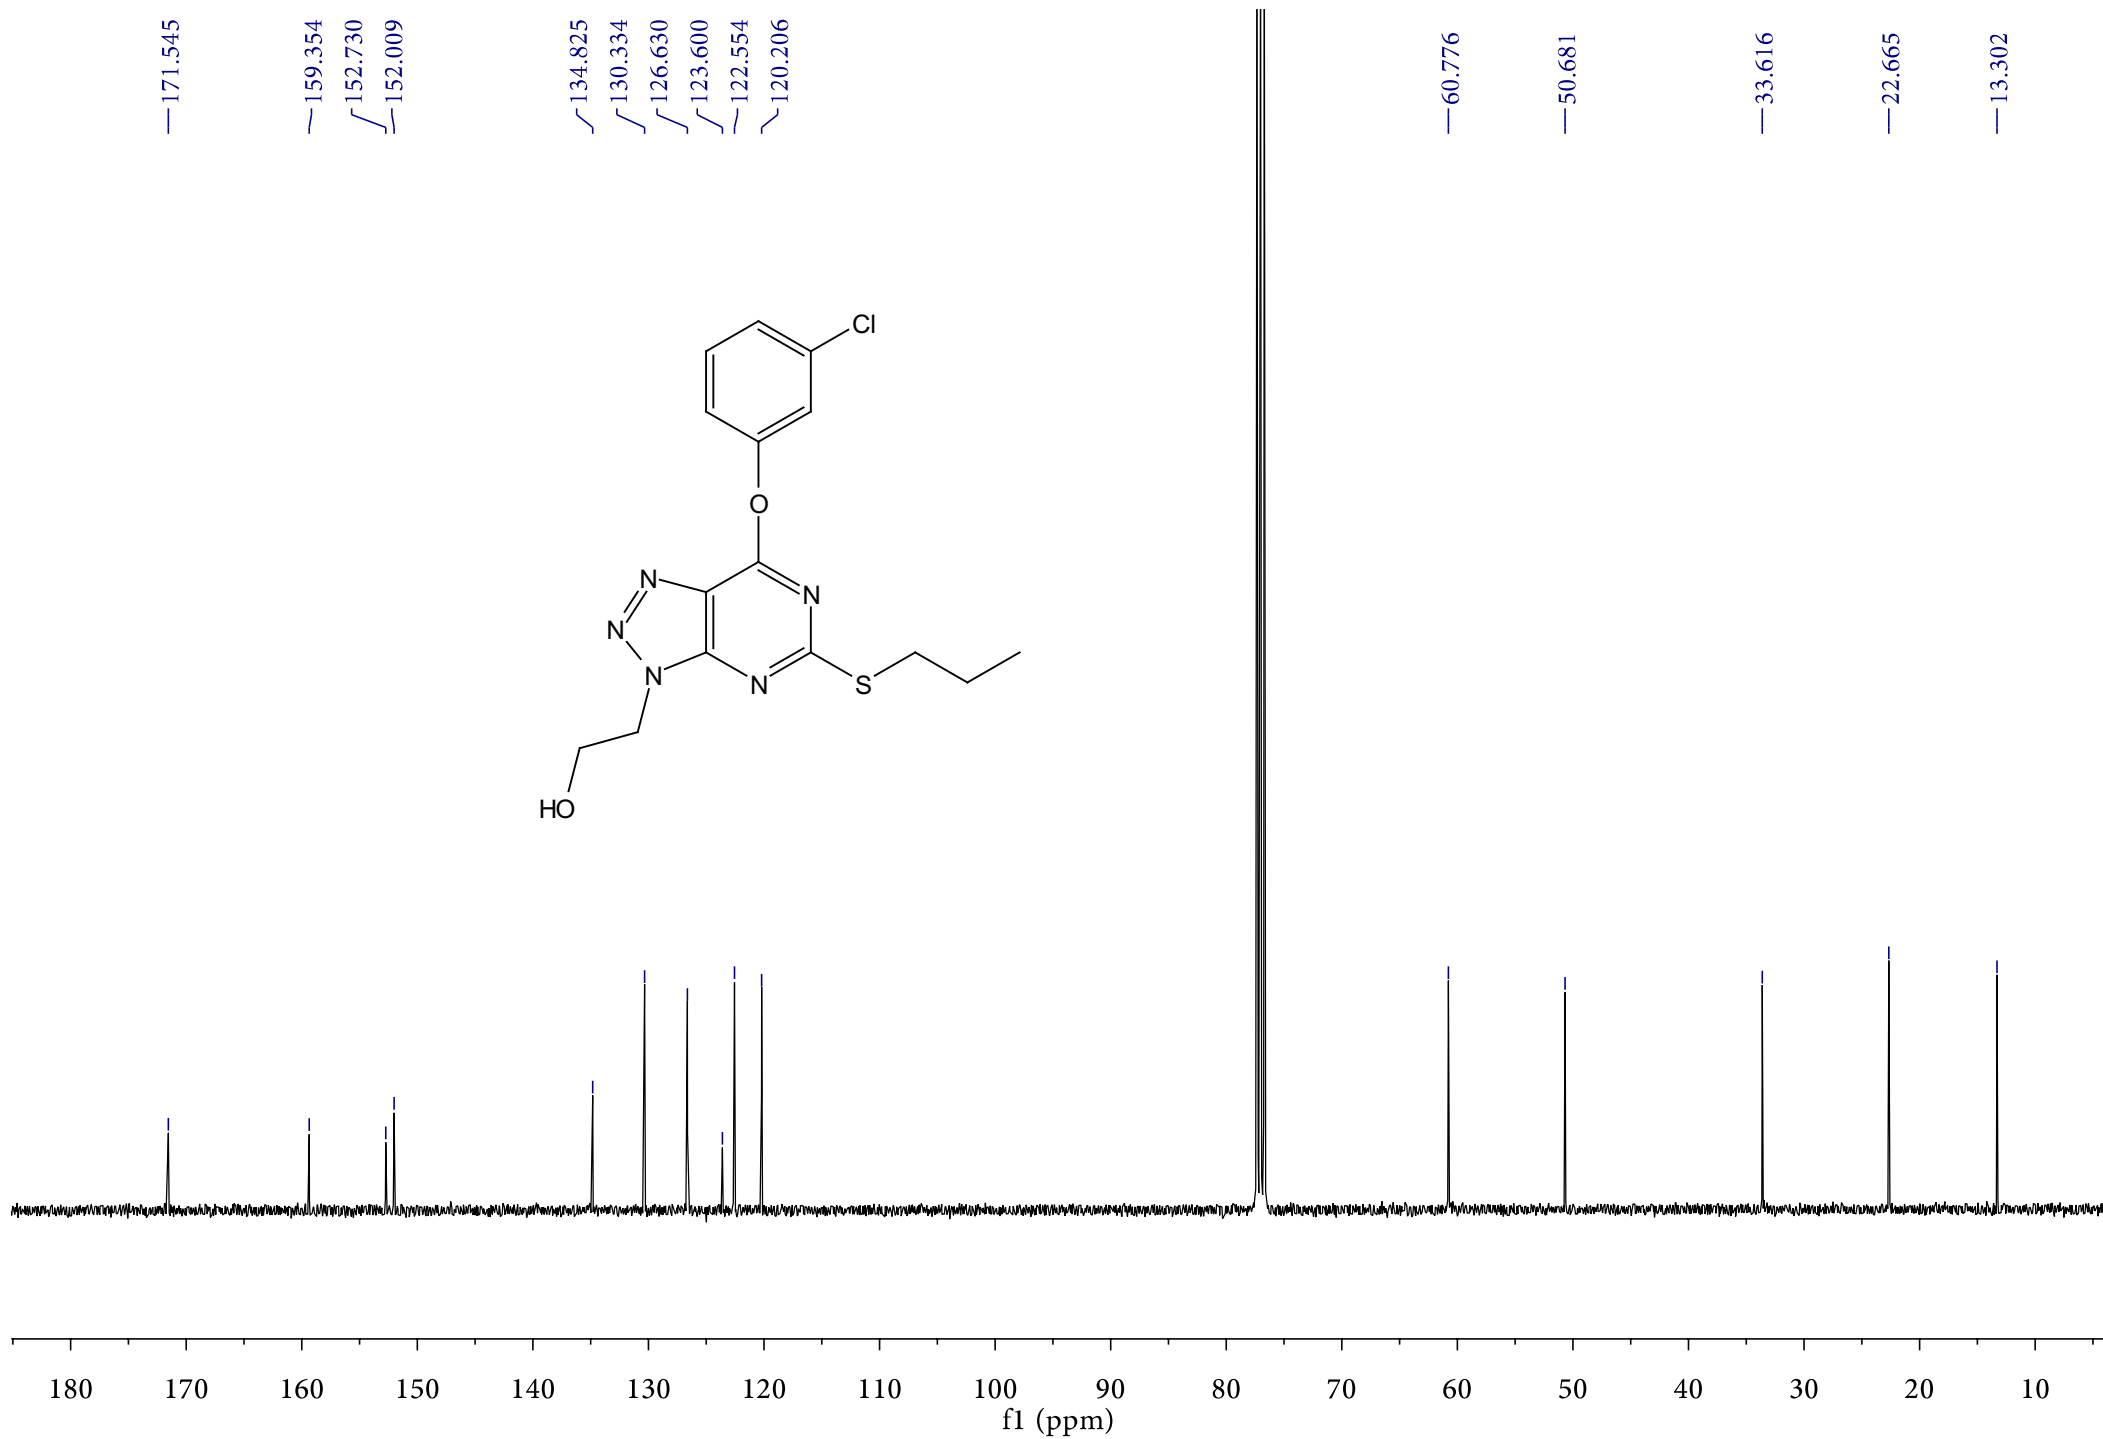

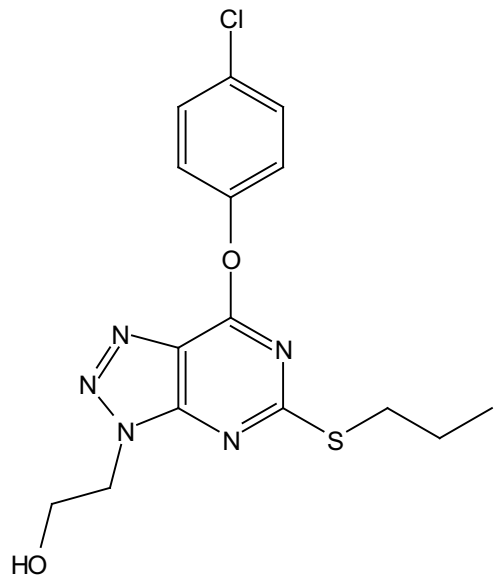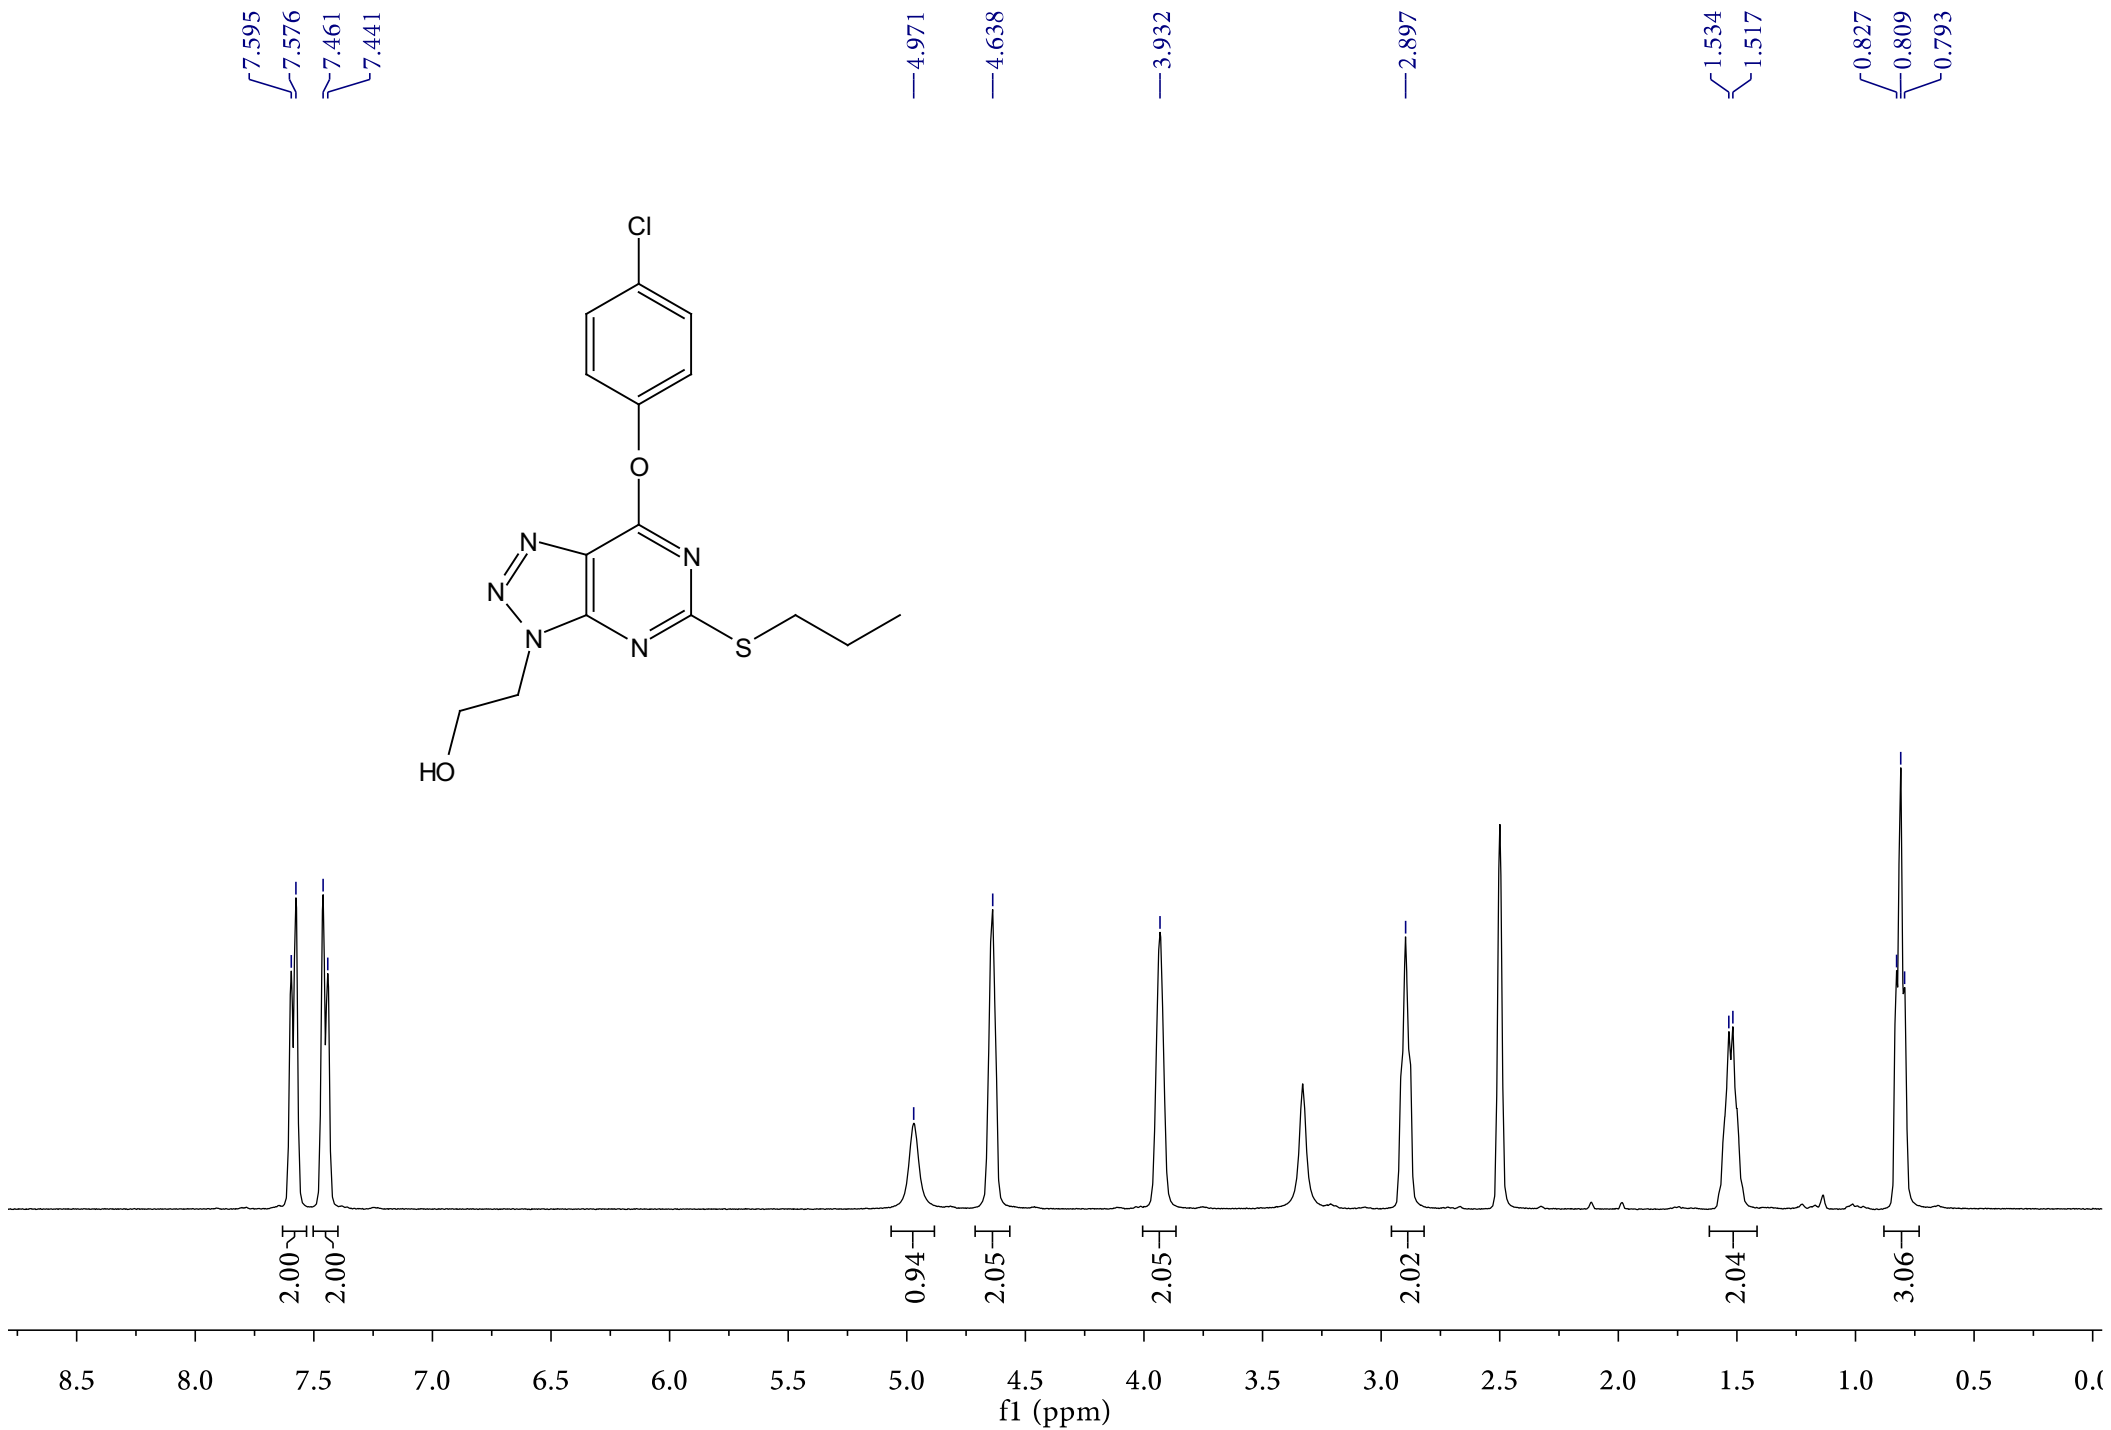

— 169.242  
— 159.184  
— 152.624  
— 150.153

— 130.541  
— 129.670  
— 123.888  
— 123.054

— 58.784  
— 49.665

— 32.662  
— 22.383  
— 13.080

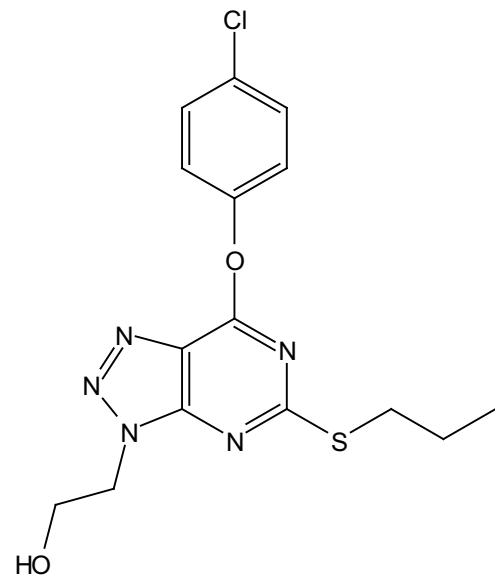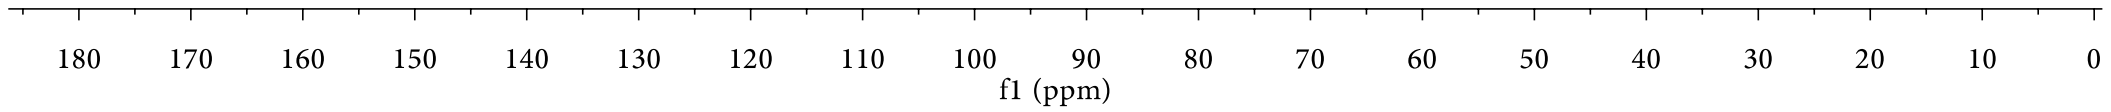

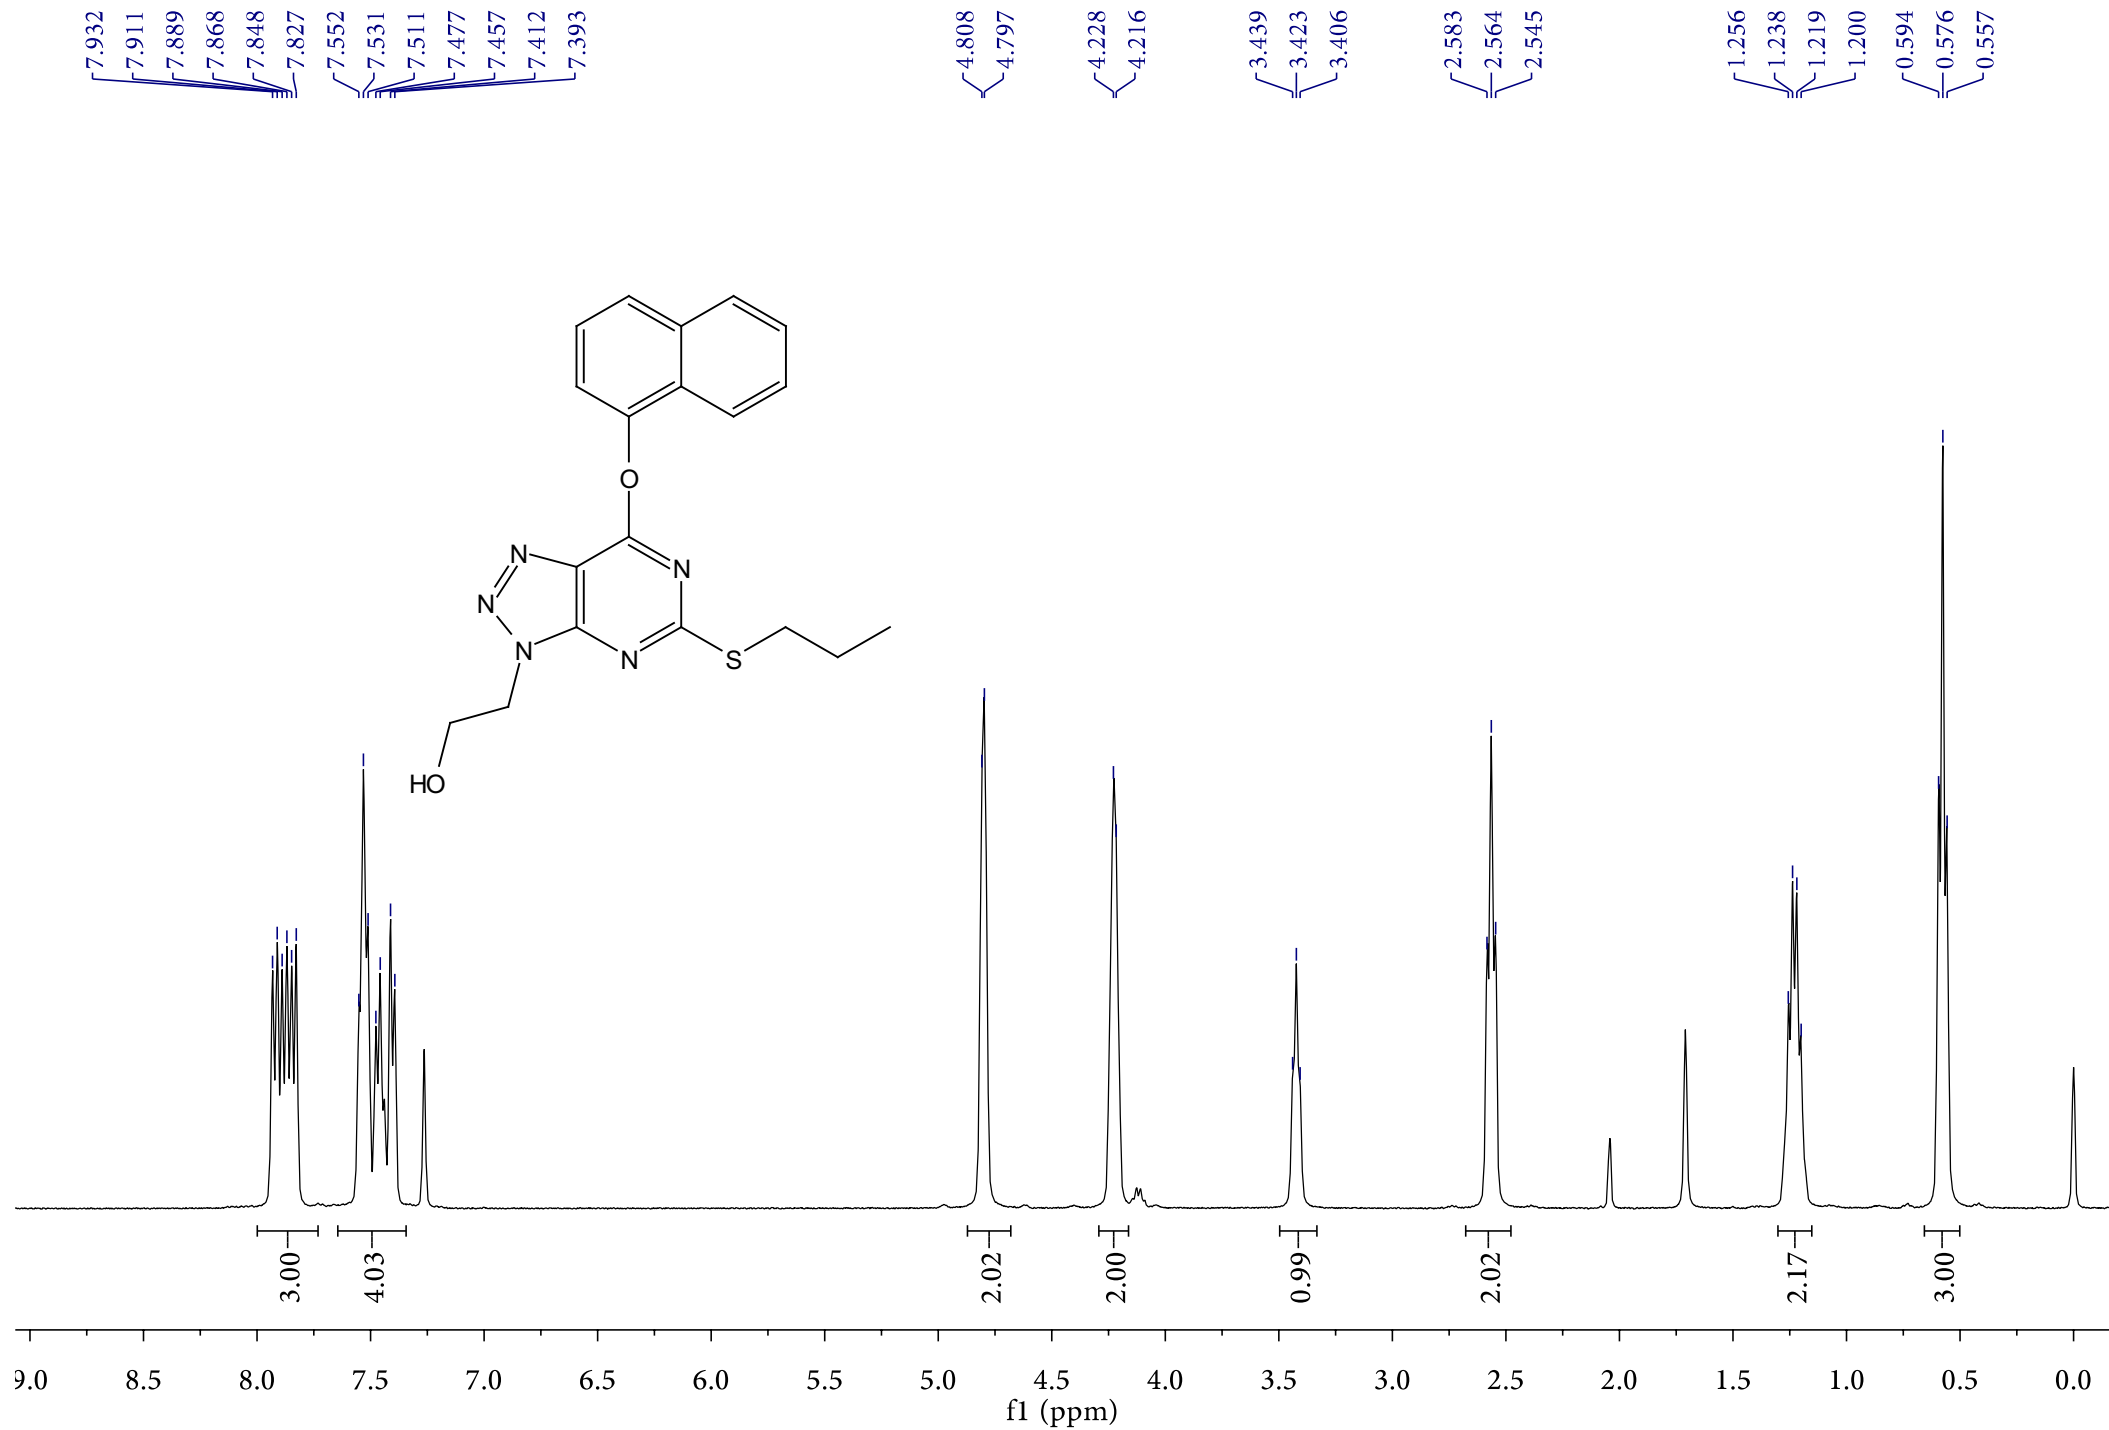

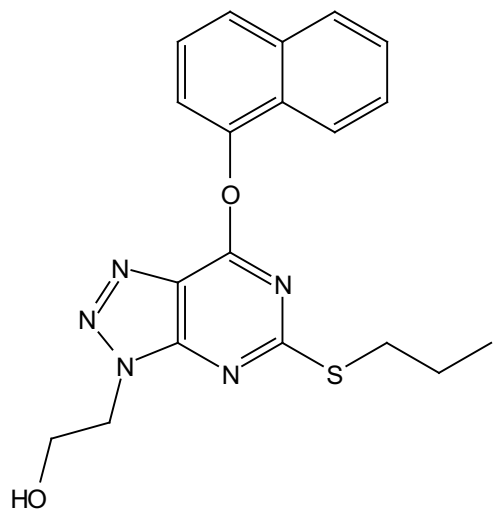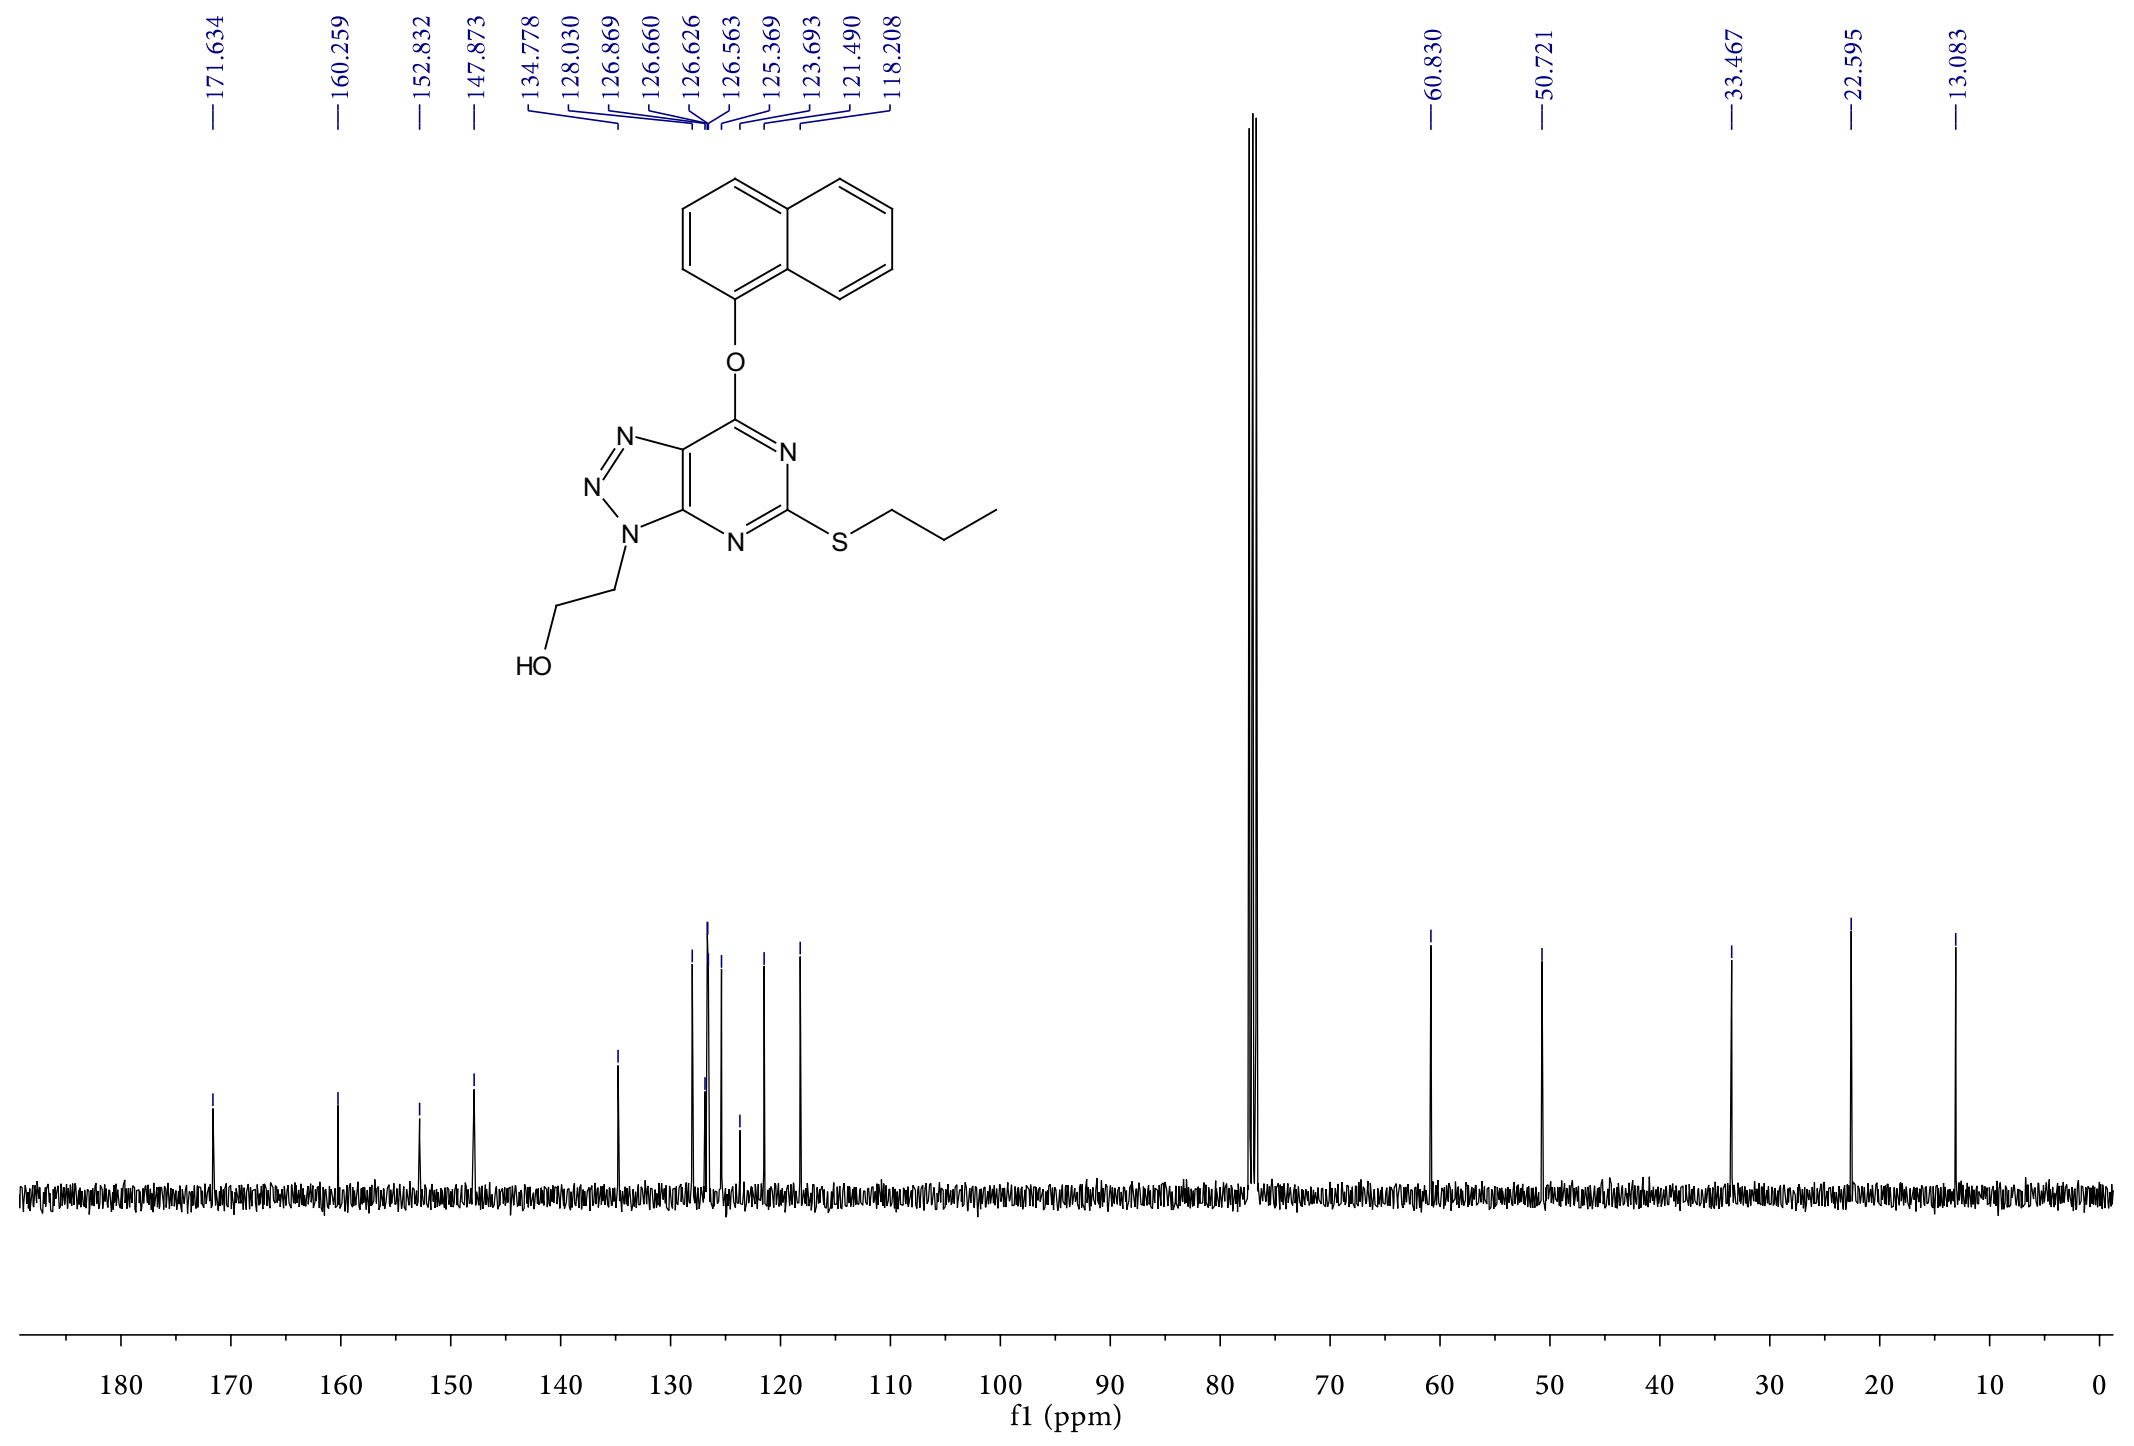

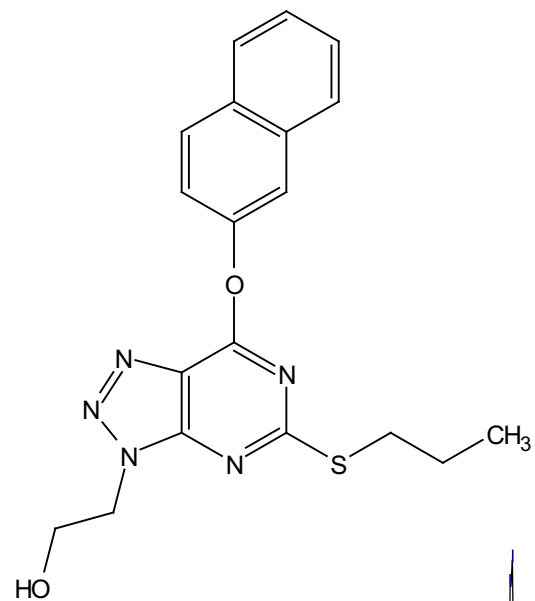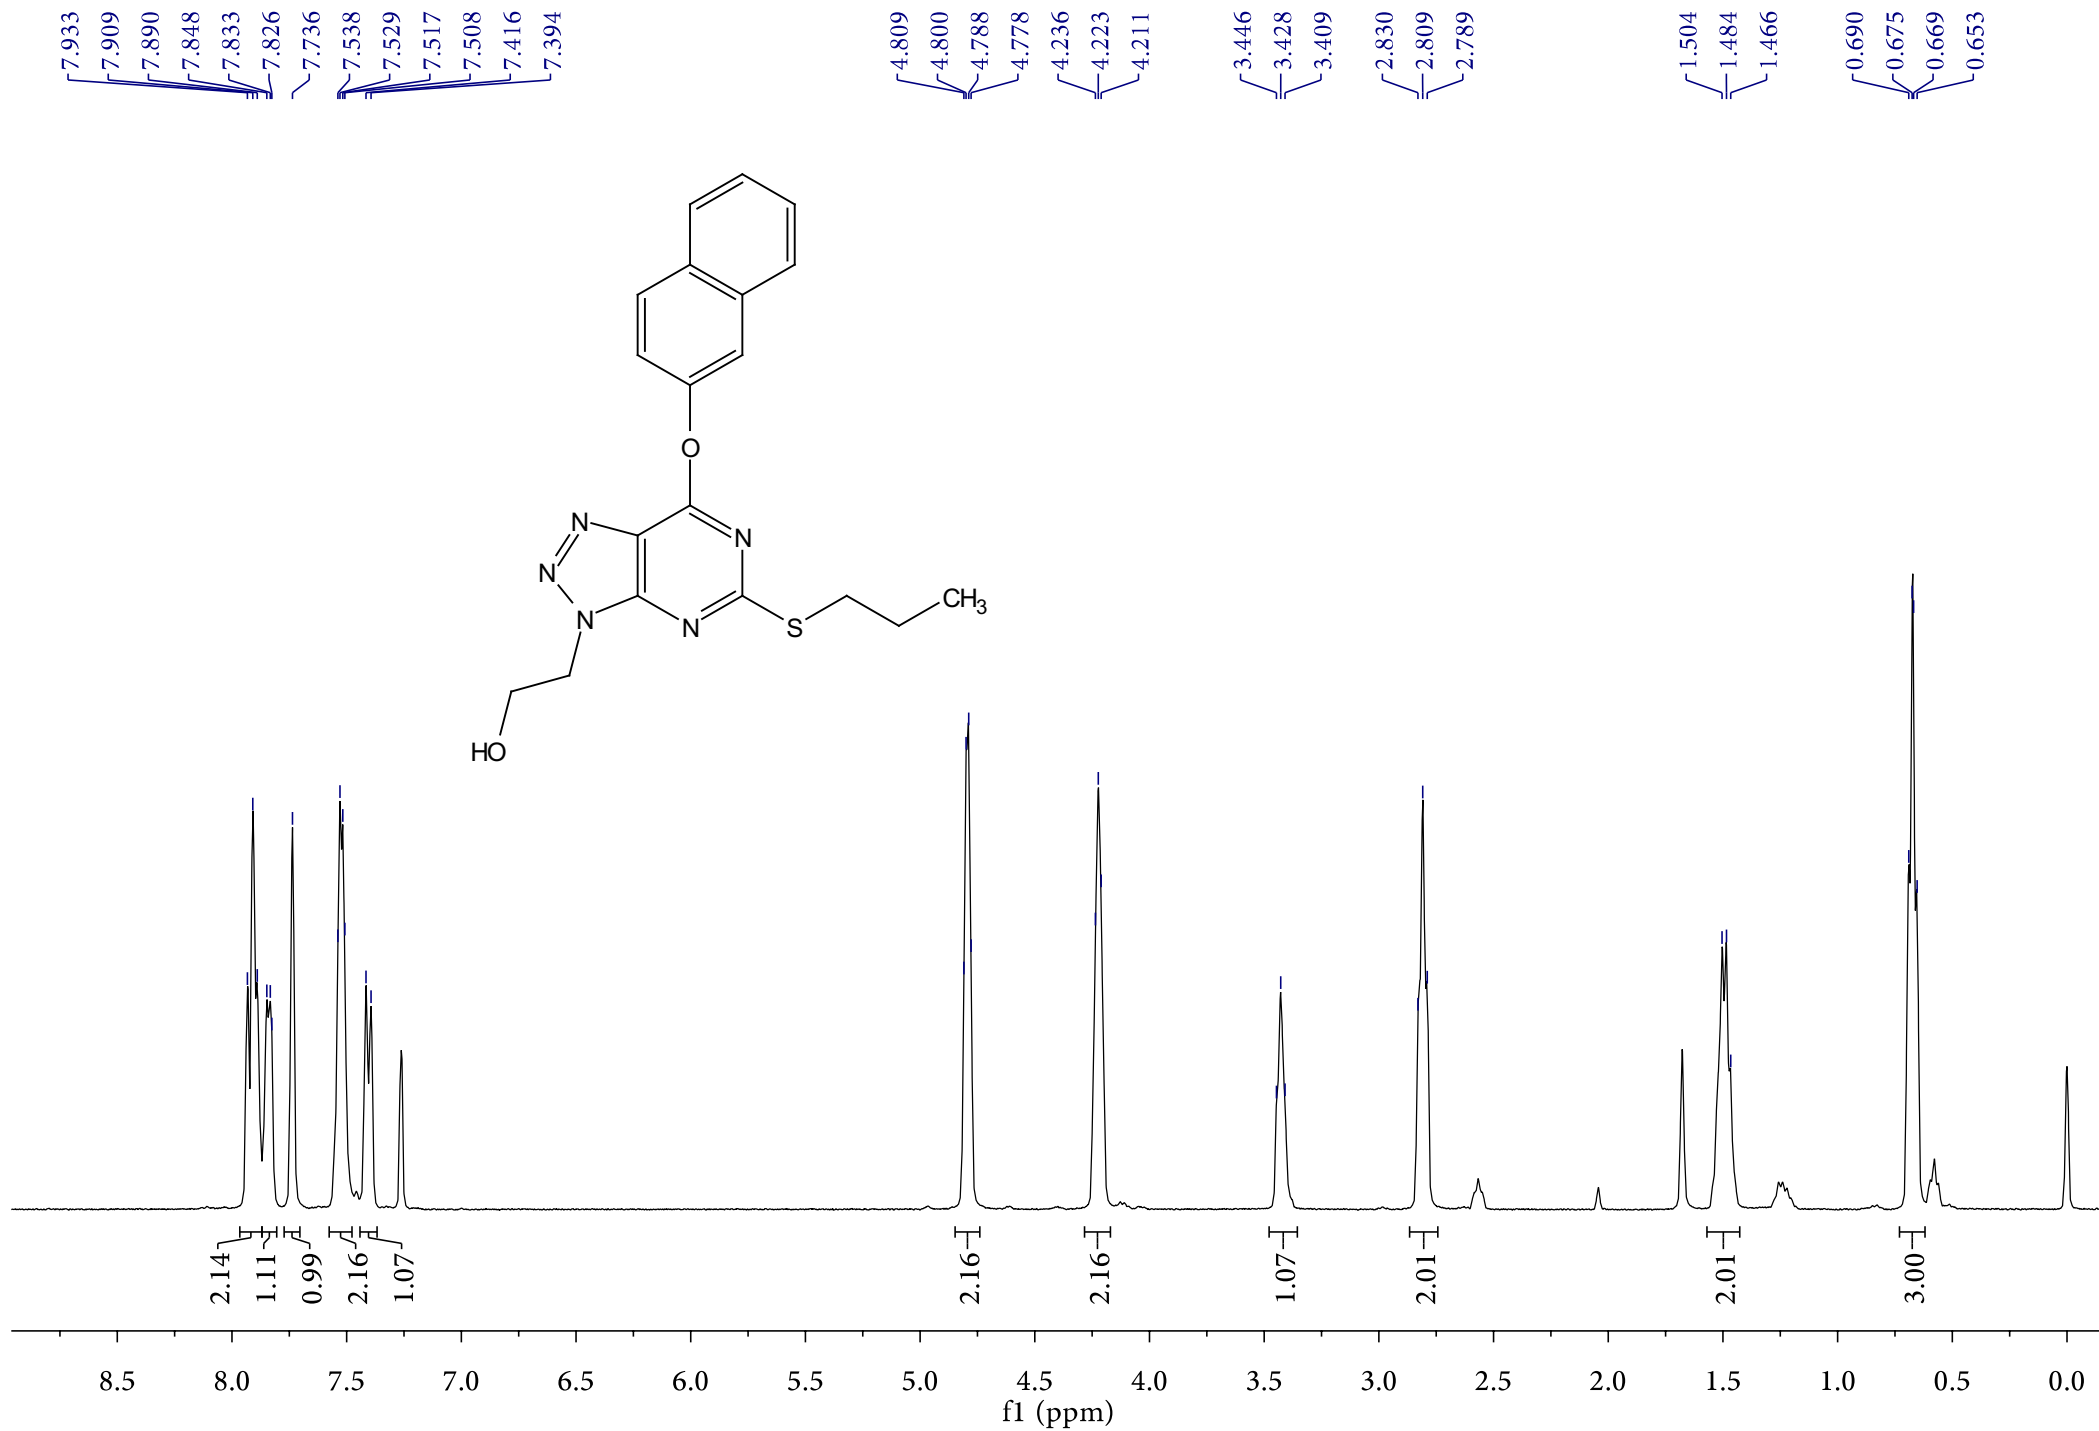

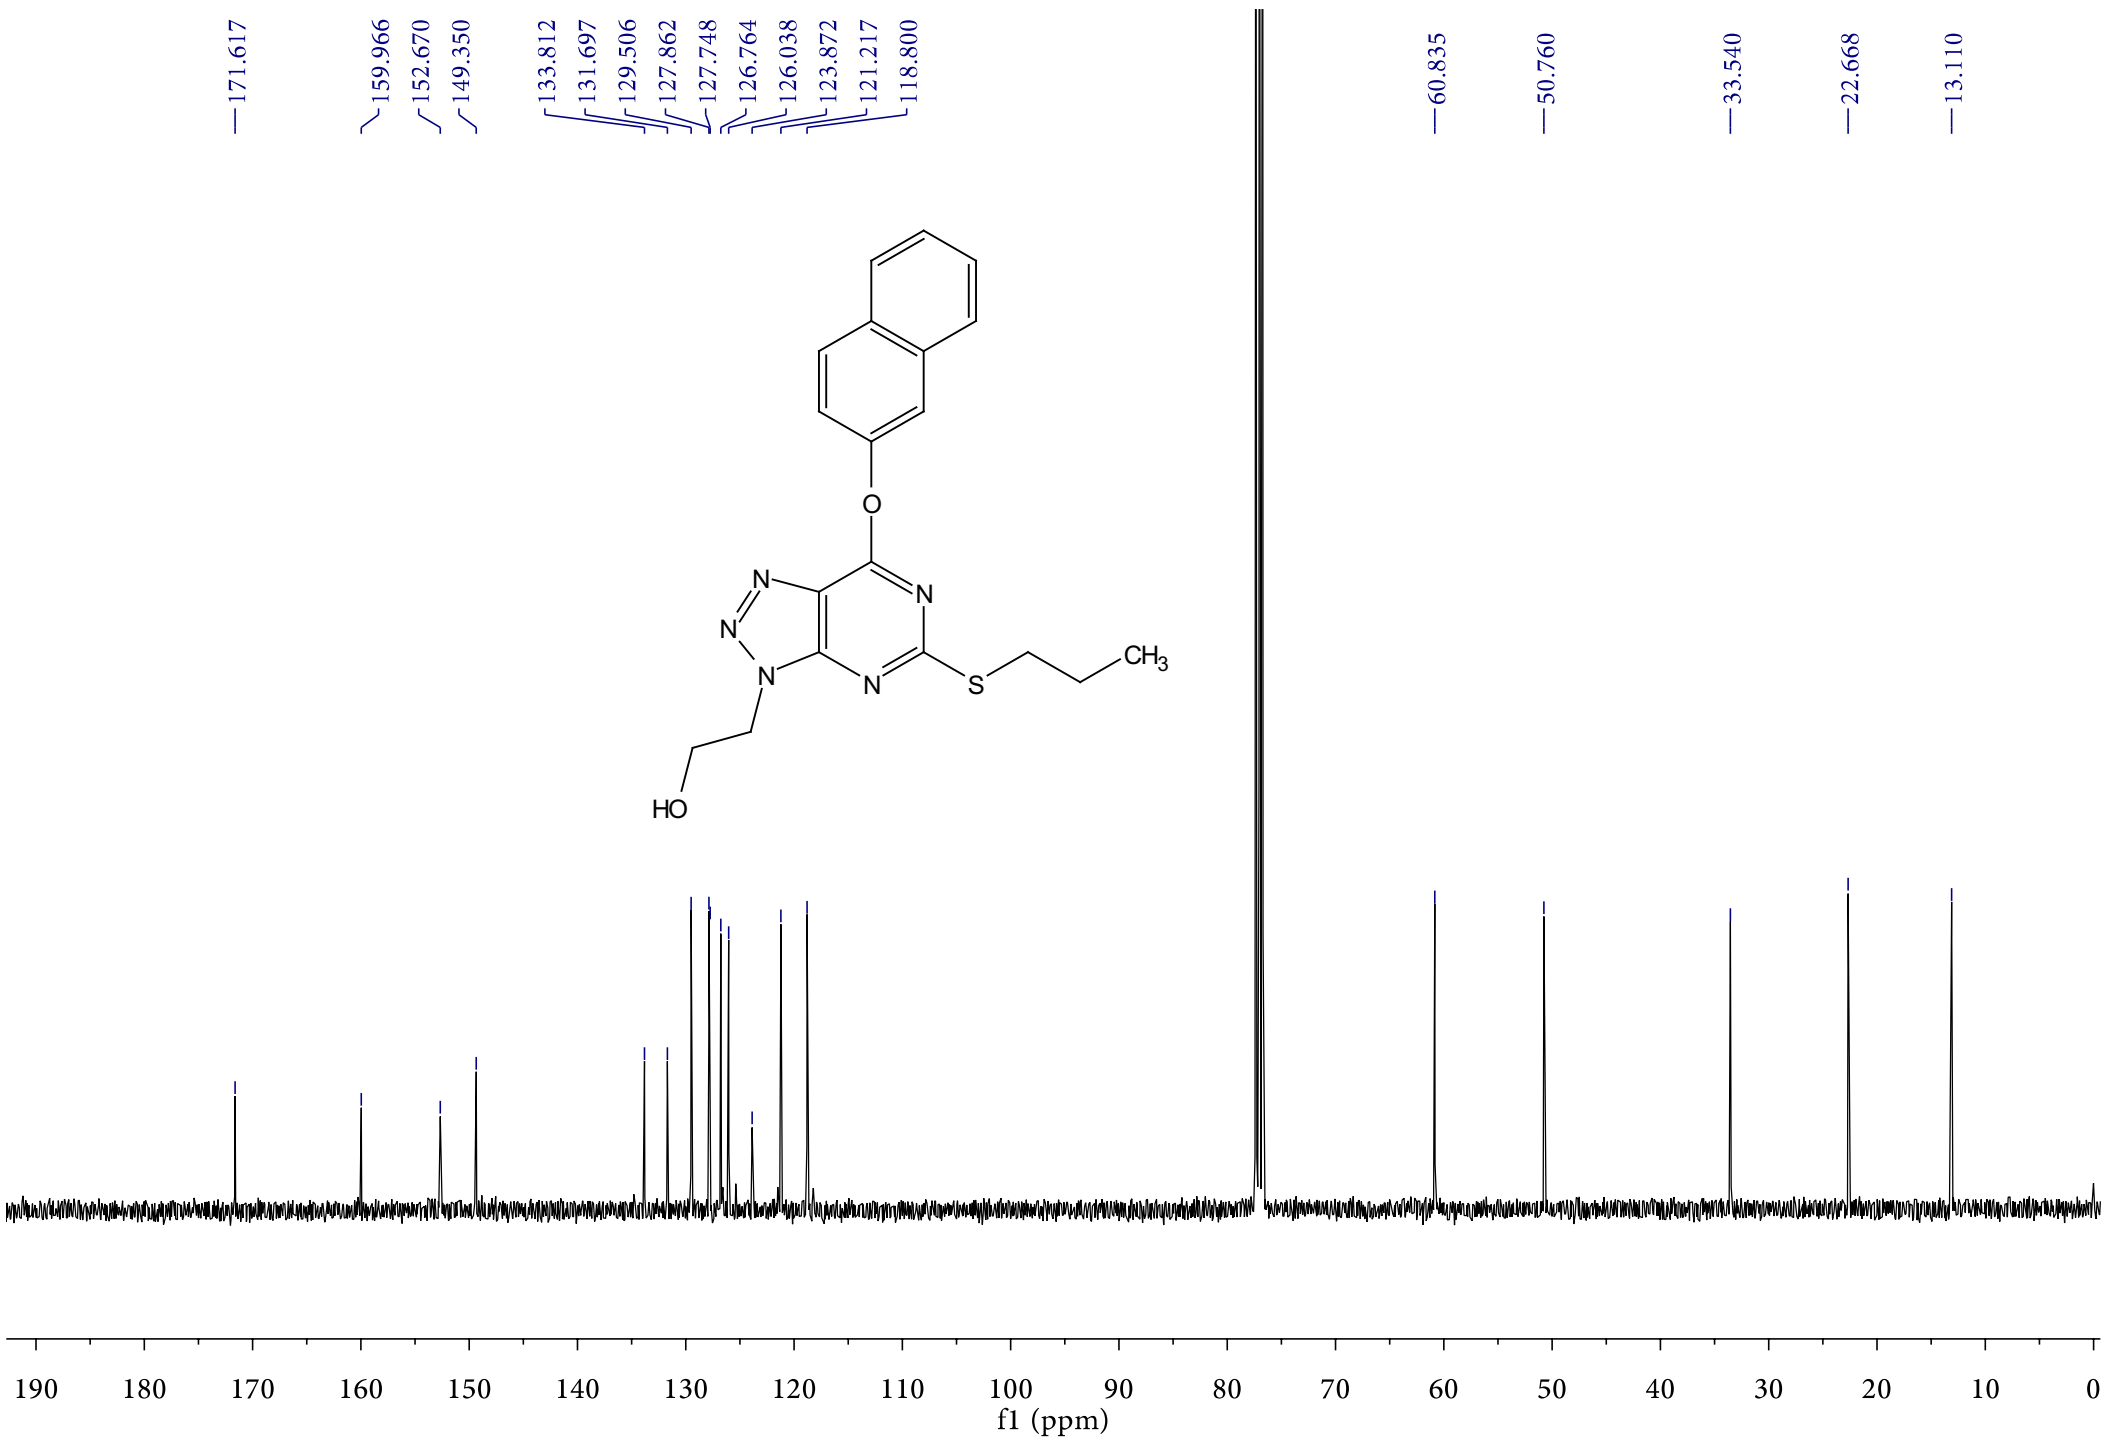



7.512  
7.504  
7.492  
7.485  
7.288  
7.280  
7.267  
7.260

4.736  
4.724

4.186  
4.173  
4.160

3.496  
3.489  
3.480

2.786  
2.780  
2.769  
2.762  
2.748  
2.742  
2.431  
2.424

1.488  
1.468  
1.449  
1.433  
1.427

0.860  
0.855  
0.842  
0.835  
0.823  
0.817

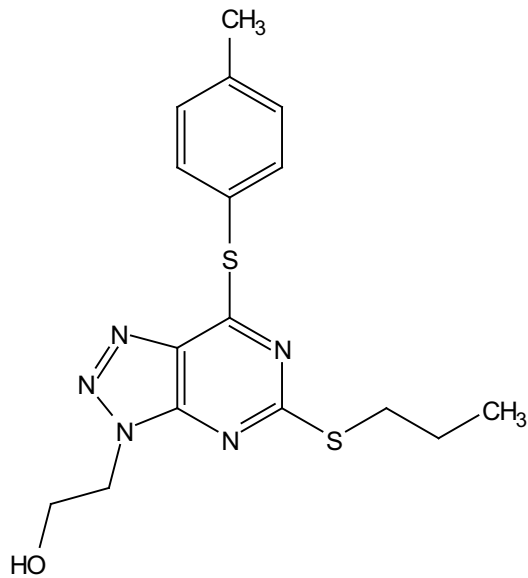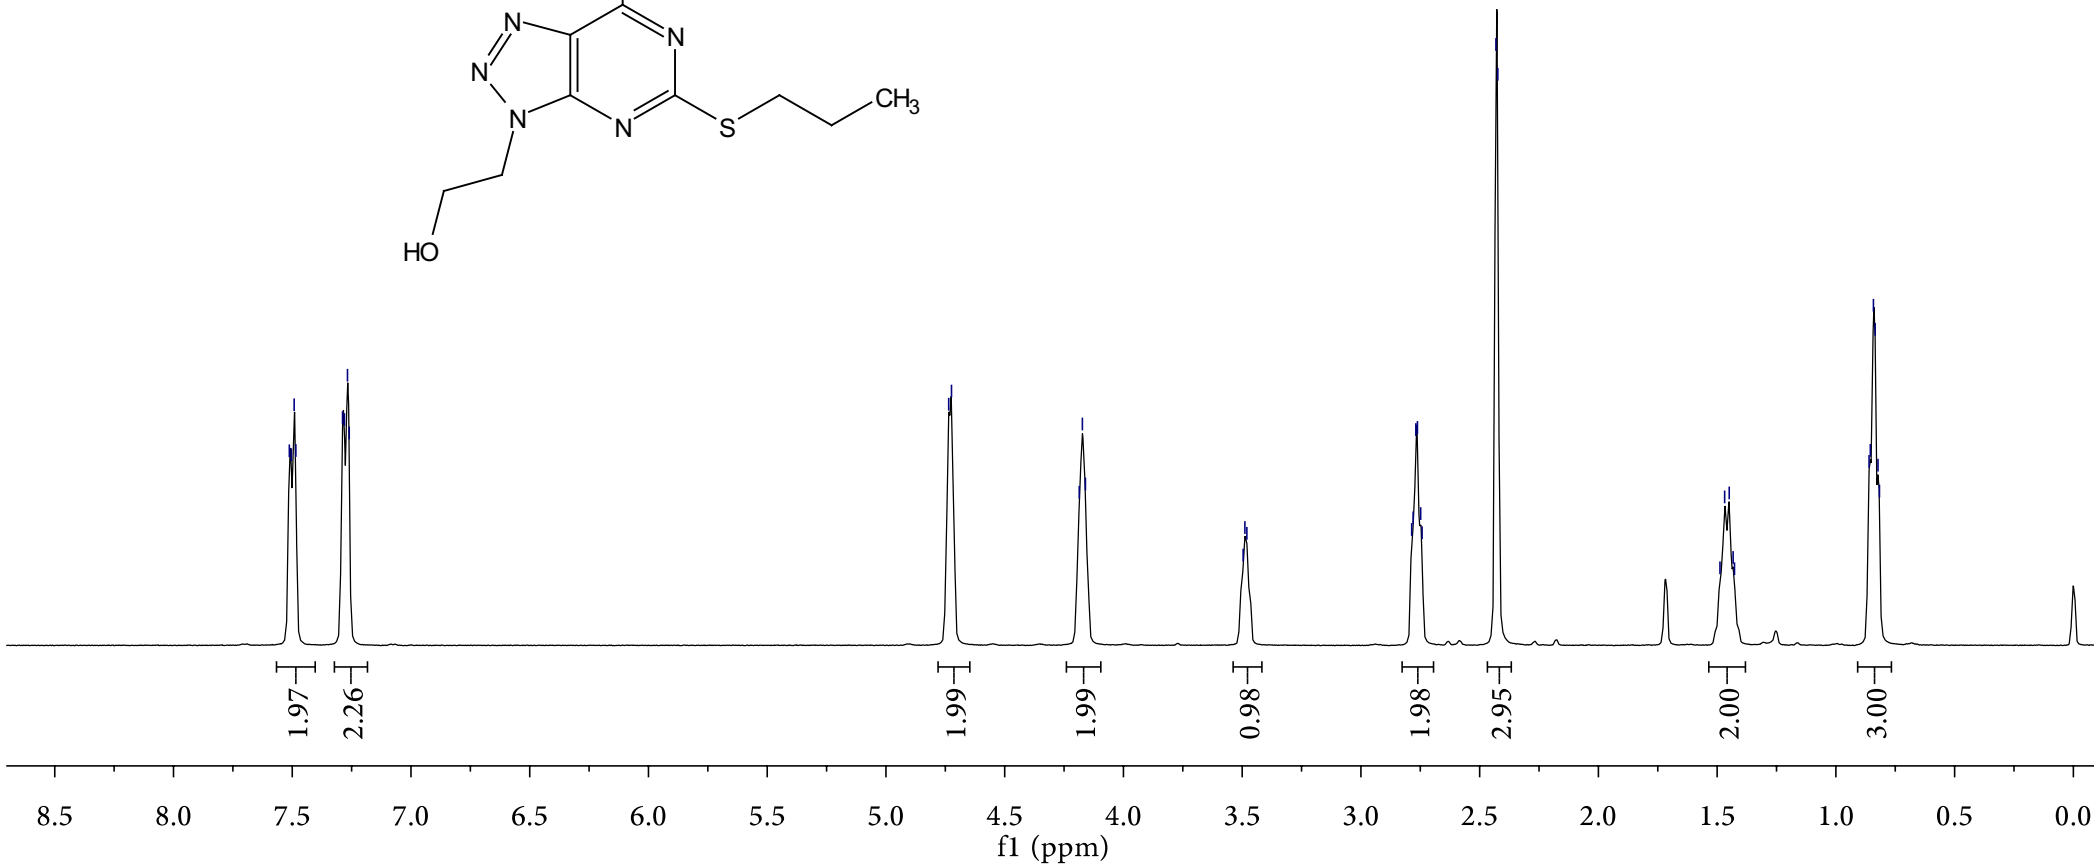

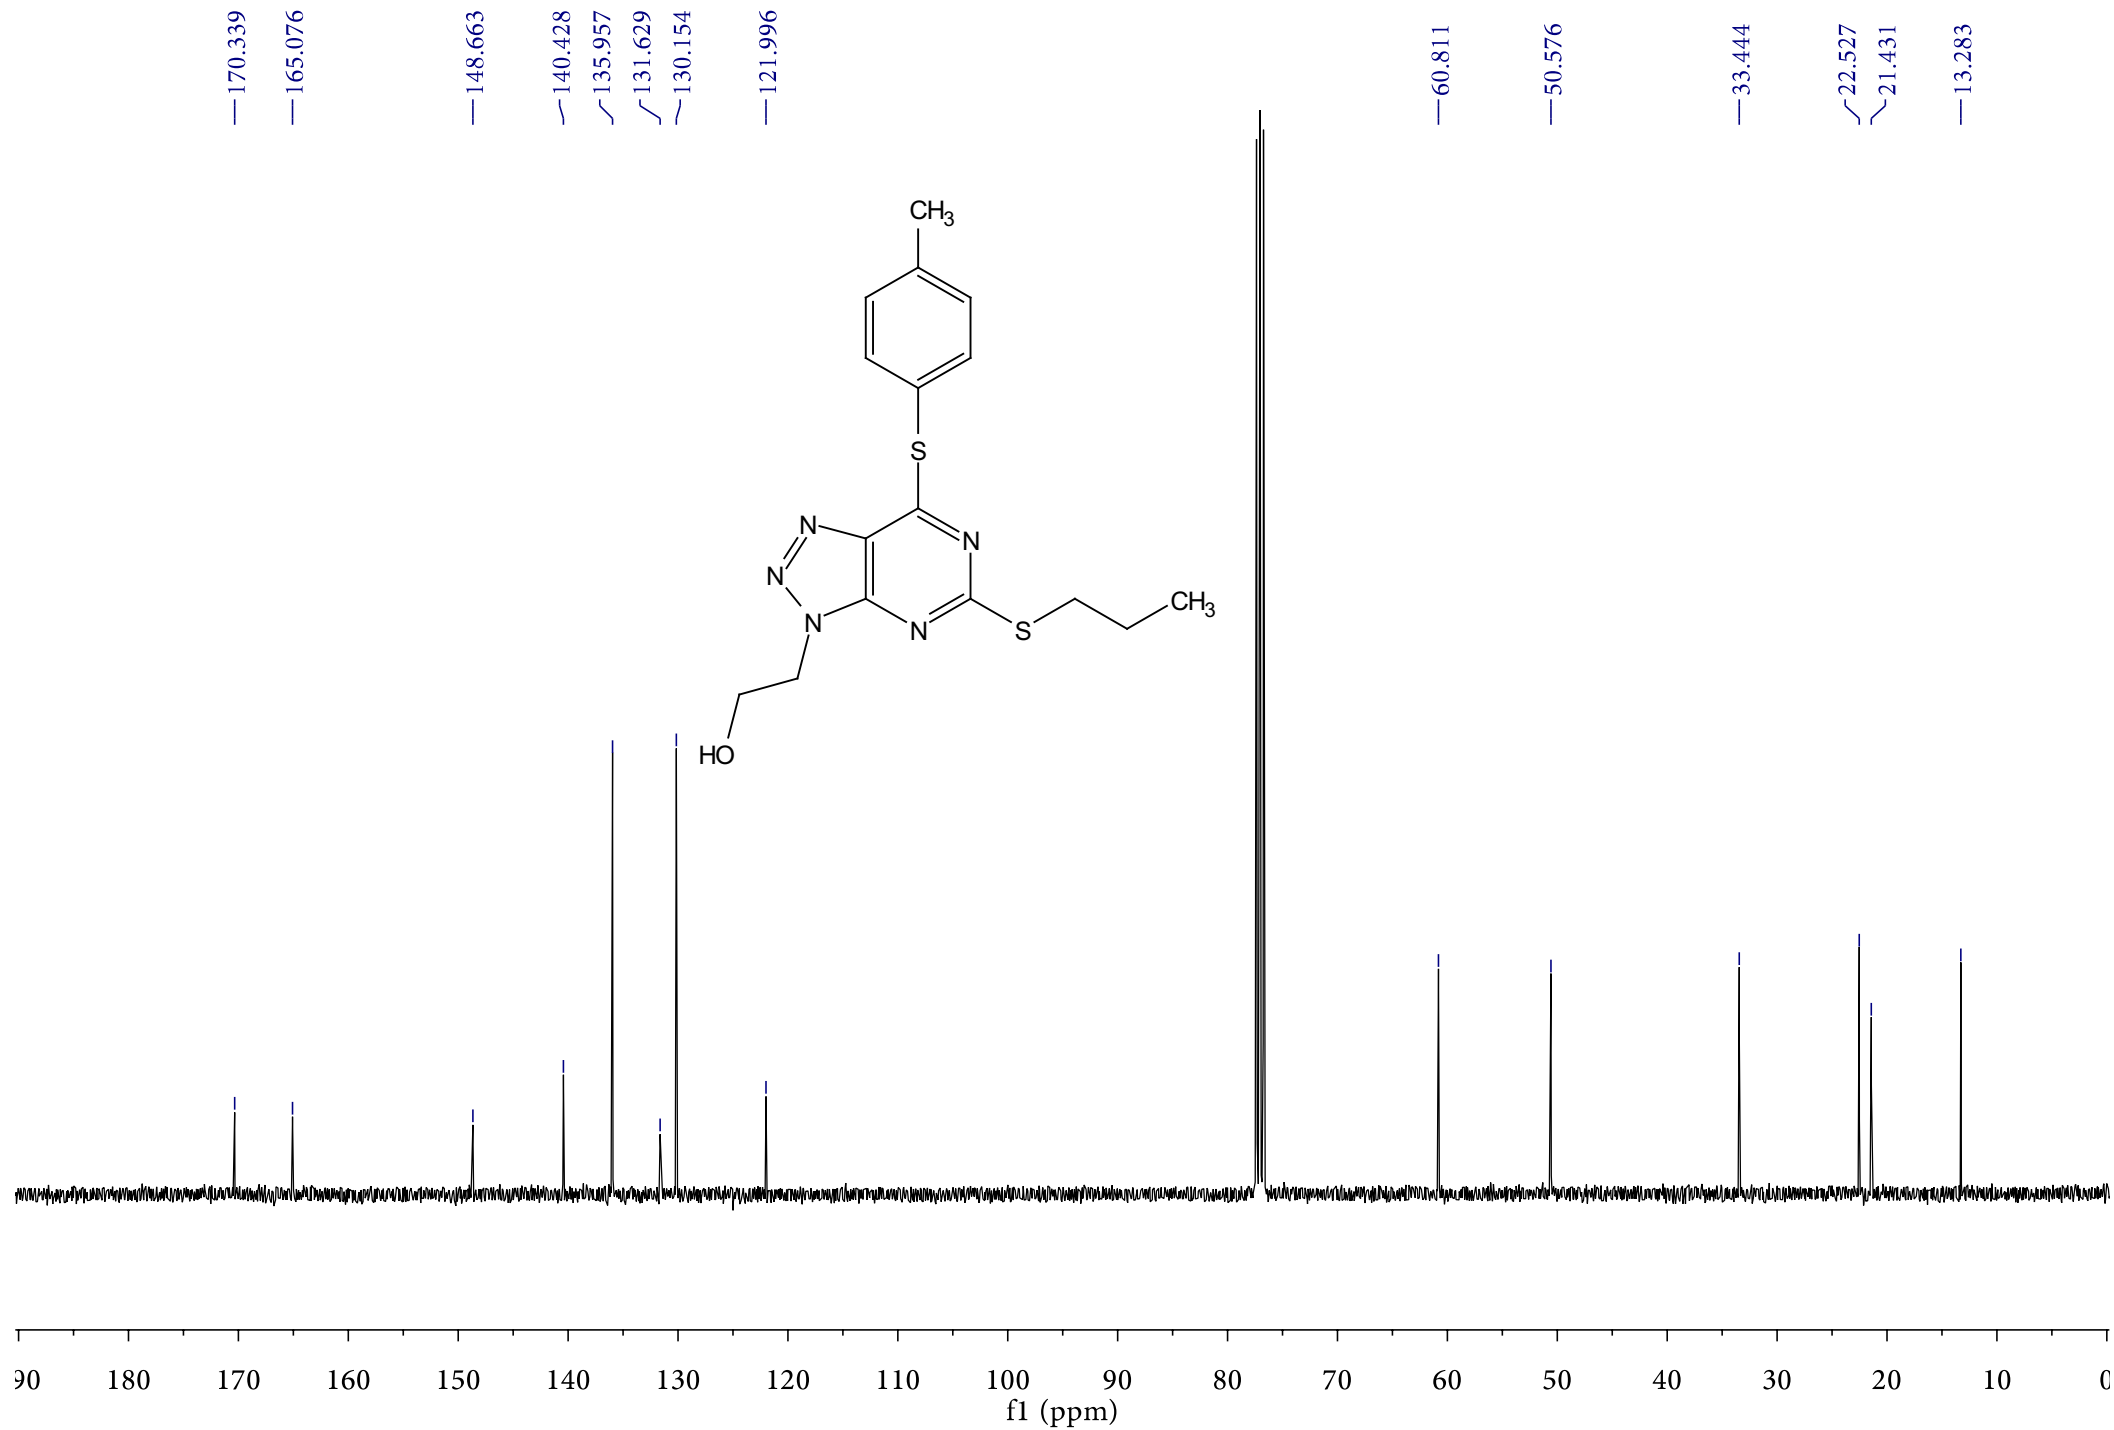

7.580  
7.573  
7.562  
7.557  
7.552  
7.475  
7.470  
7.464  
7.449  
7.442

4.755  
4.734  
4.723  
4.196  
4.182  
4.169

3.322  
3.289  
3.283  
2.826  
2.820  
2.807  
2.801  
2.787  
2.781  
1.535  
1.531  
1.512  
1.493  
1.477  
1.471  
0.897  
0.891  
0.879

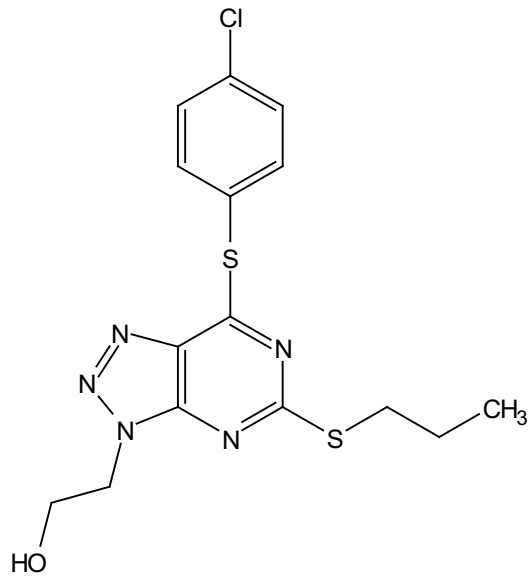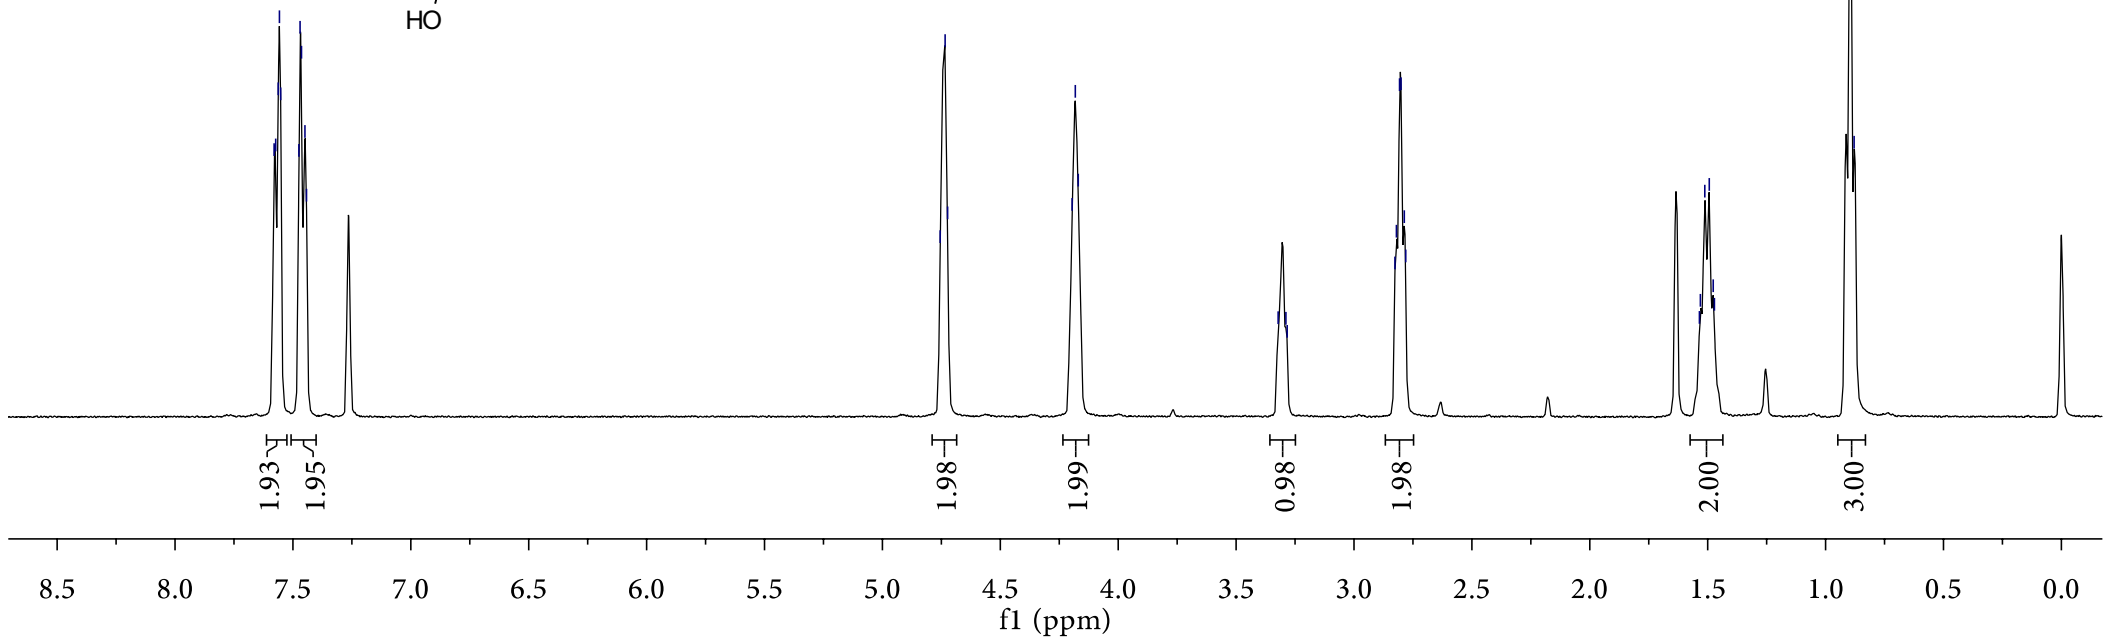

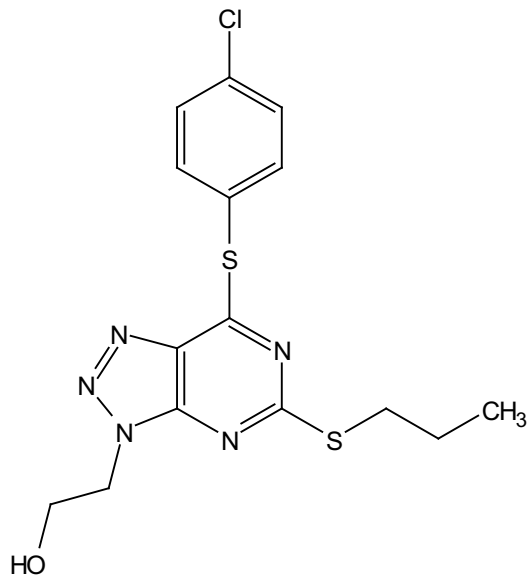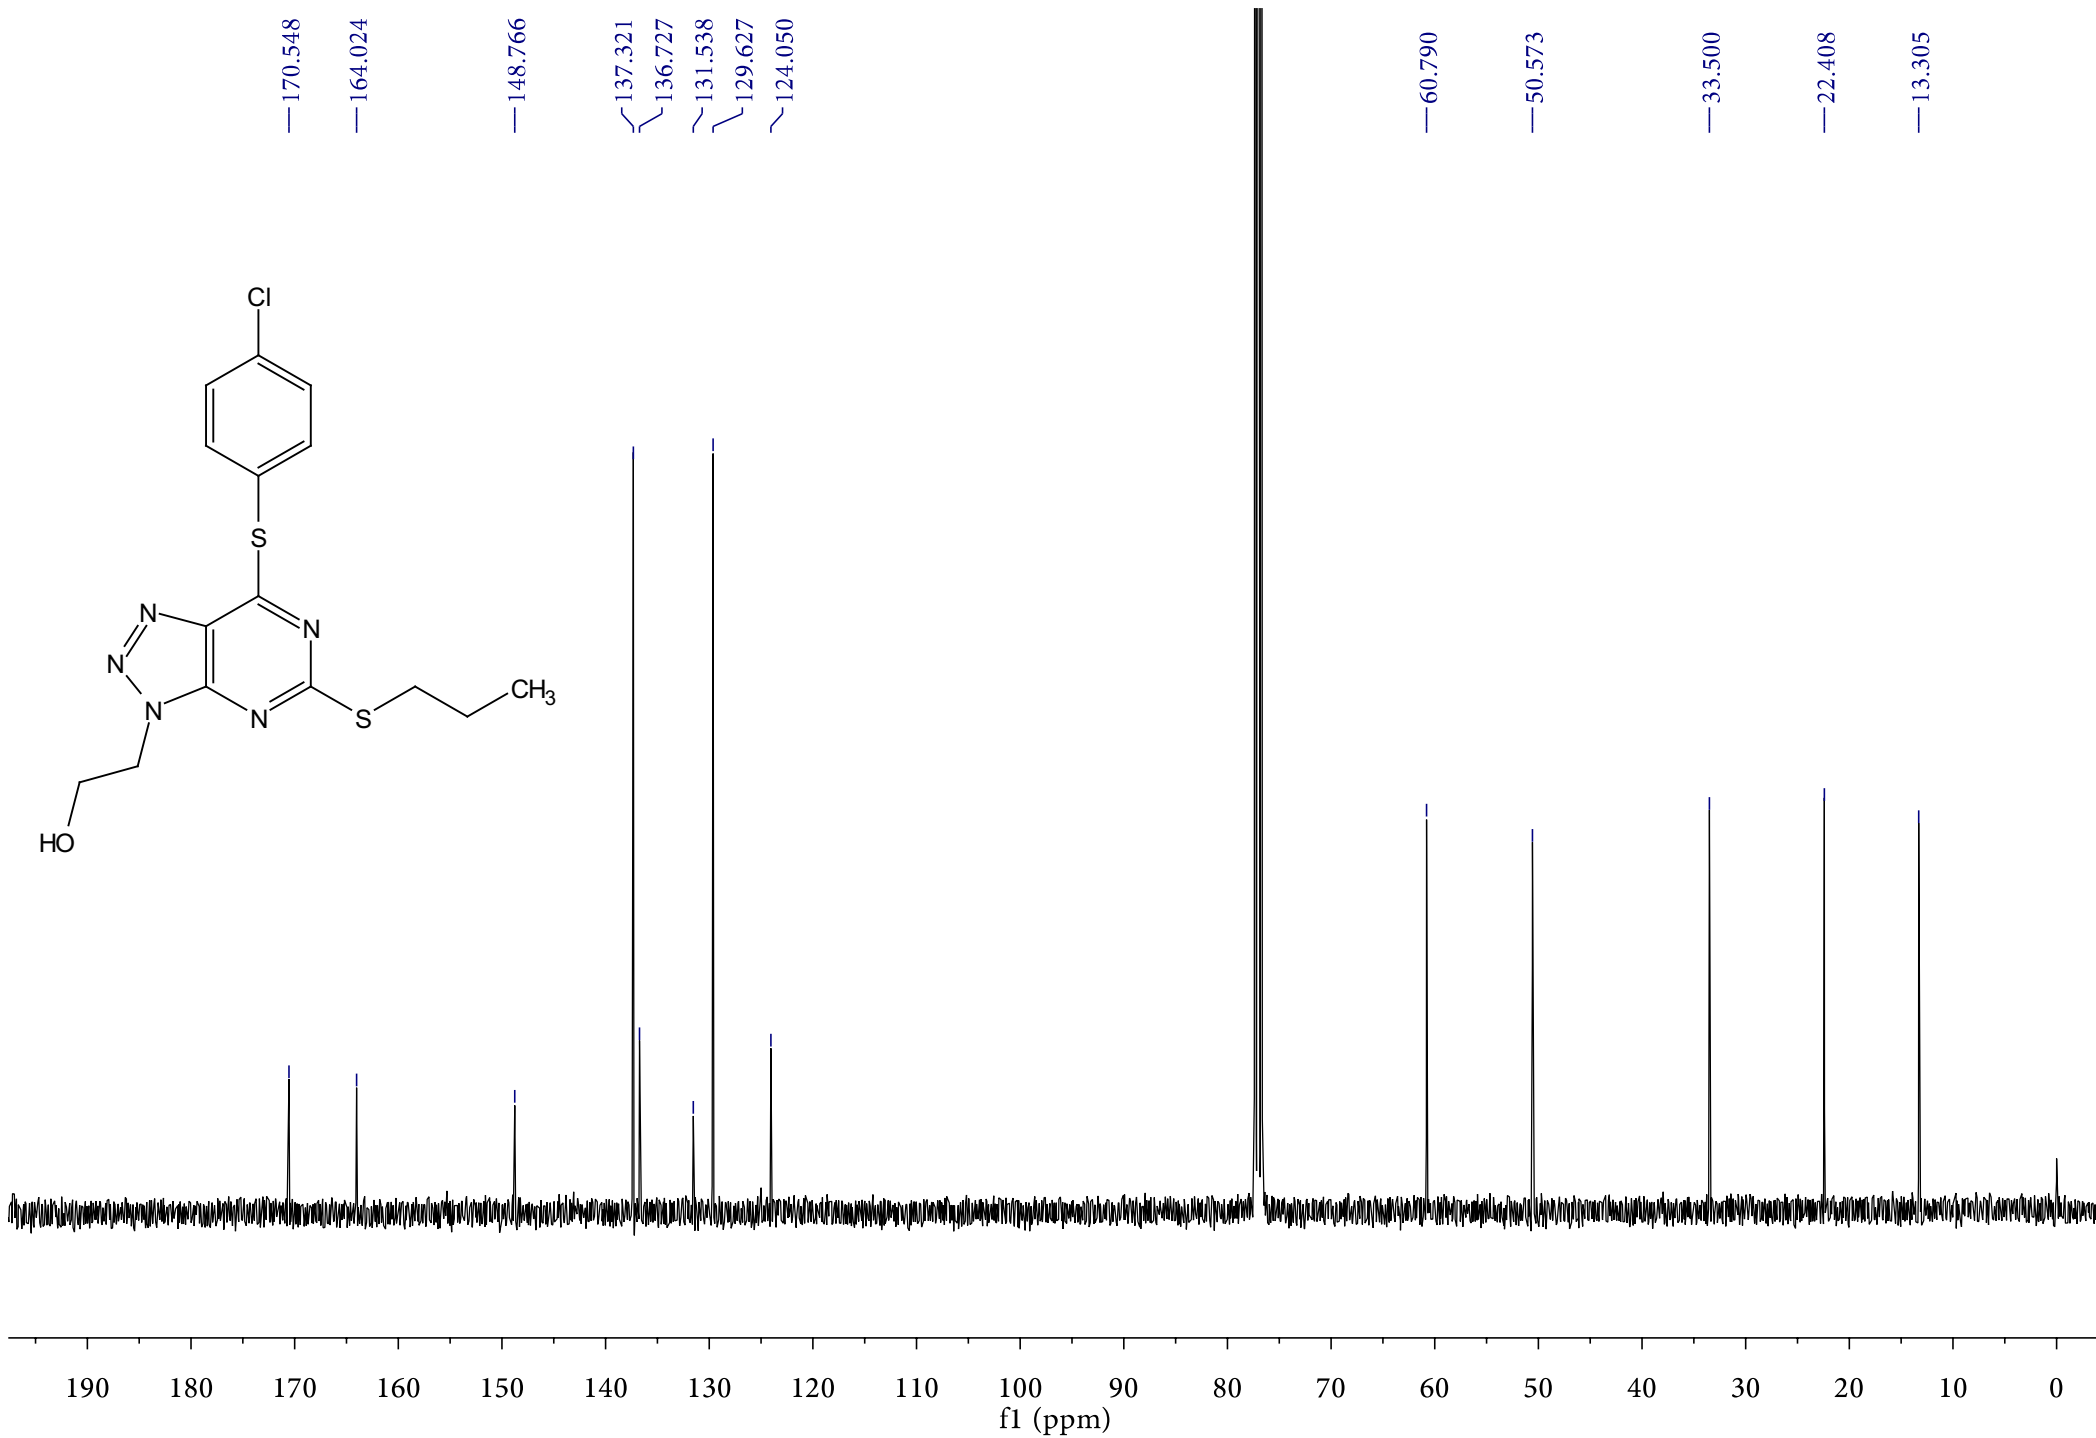

8.692  
8.689  
8.684  
8.680  
8.677  
7.821  
7.818  
7.812  
7.809  
7.416  
7.407  
7.403  
7.395  
7.390  
7.382

4.739  
4.724  
4.714  
4.181  
4.168  
4.156

2.874  
2.856  
2.838

1.588  
1.570  
1.551  
1.533  
0.934  
0.916  
0.898

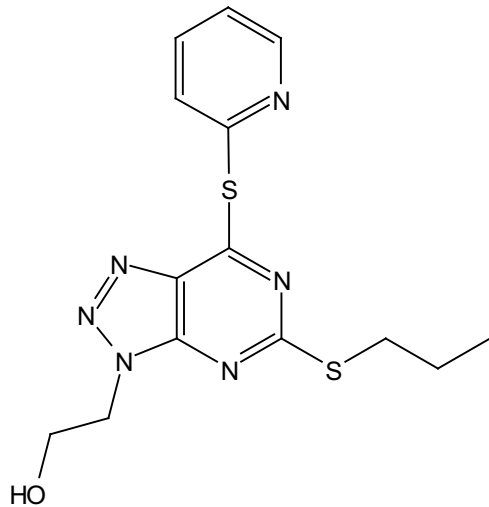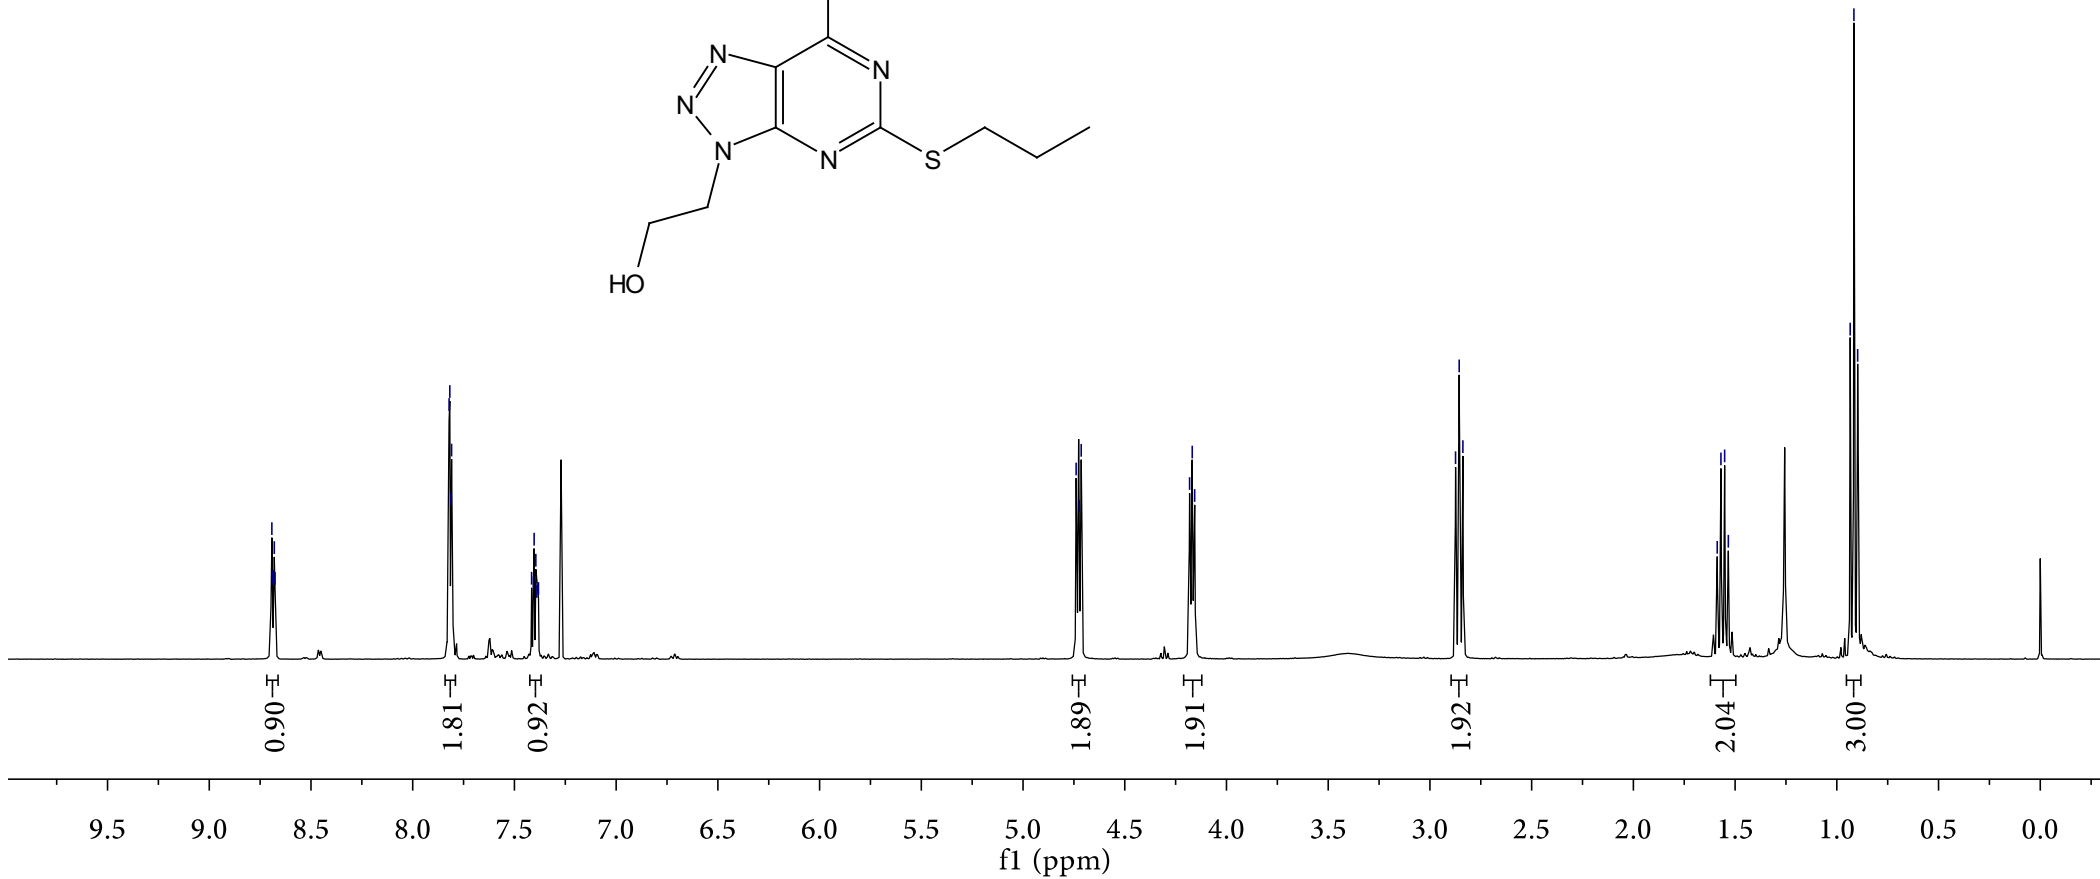

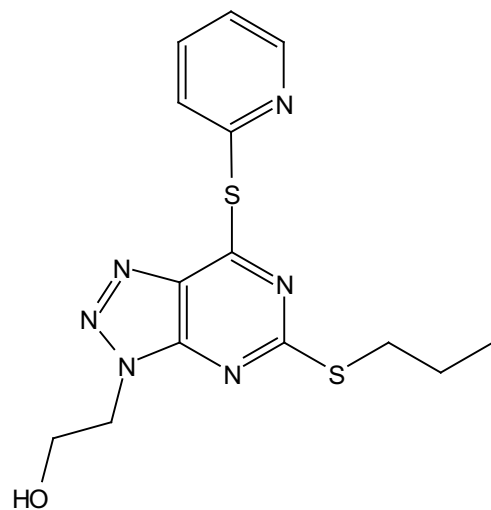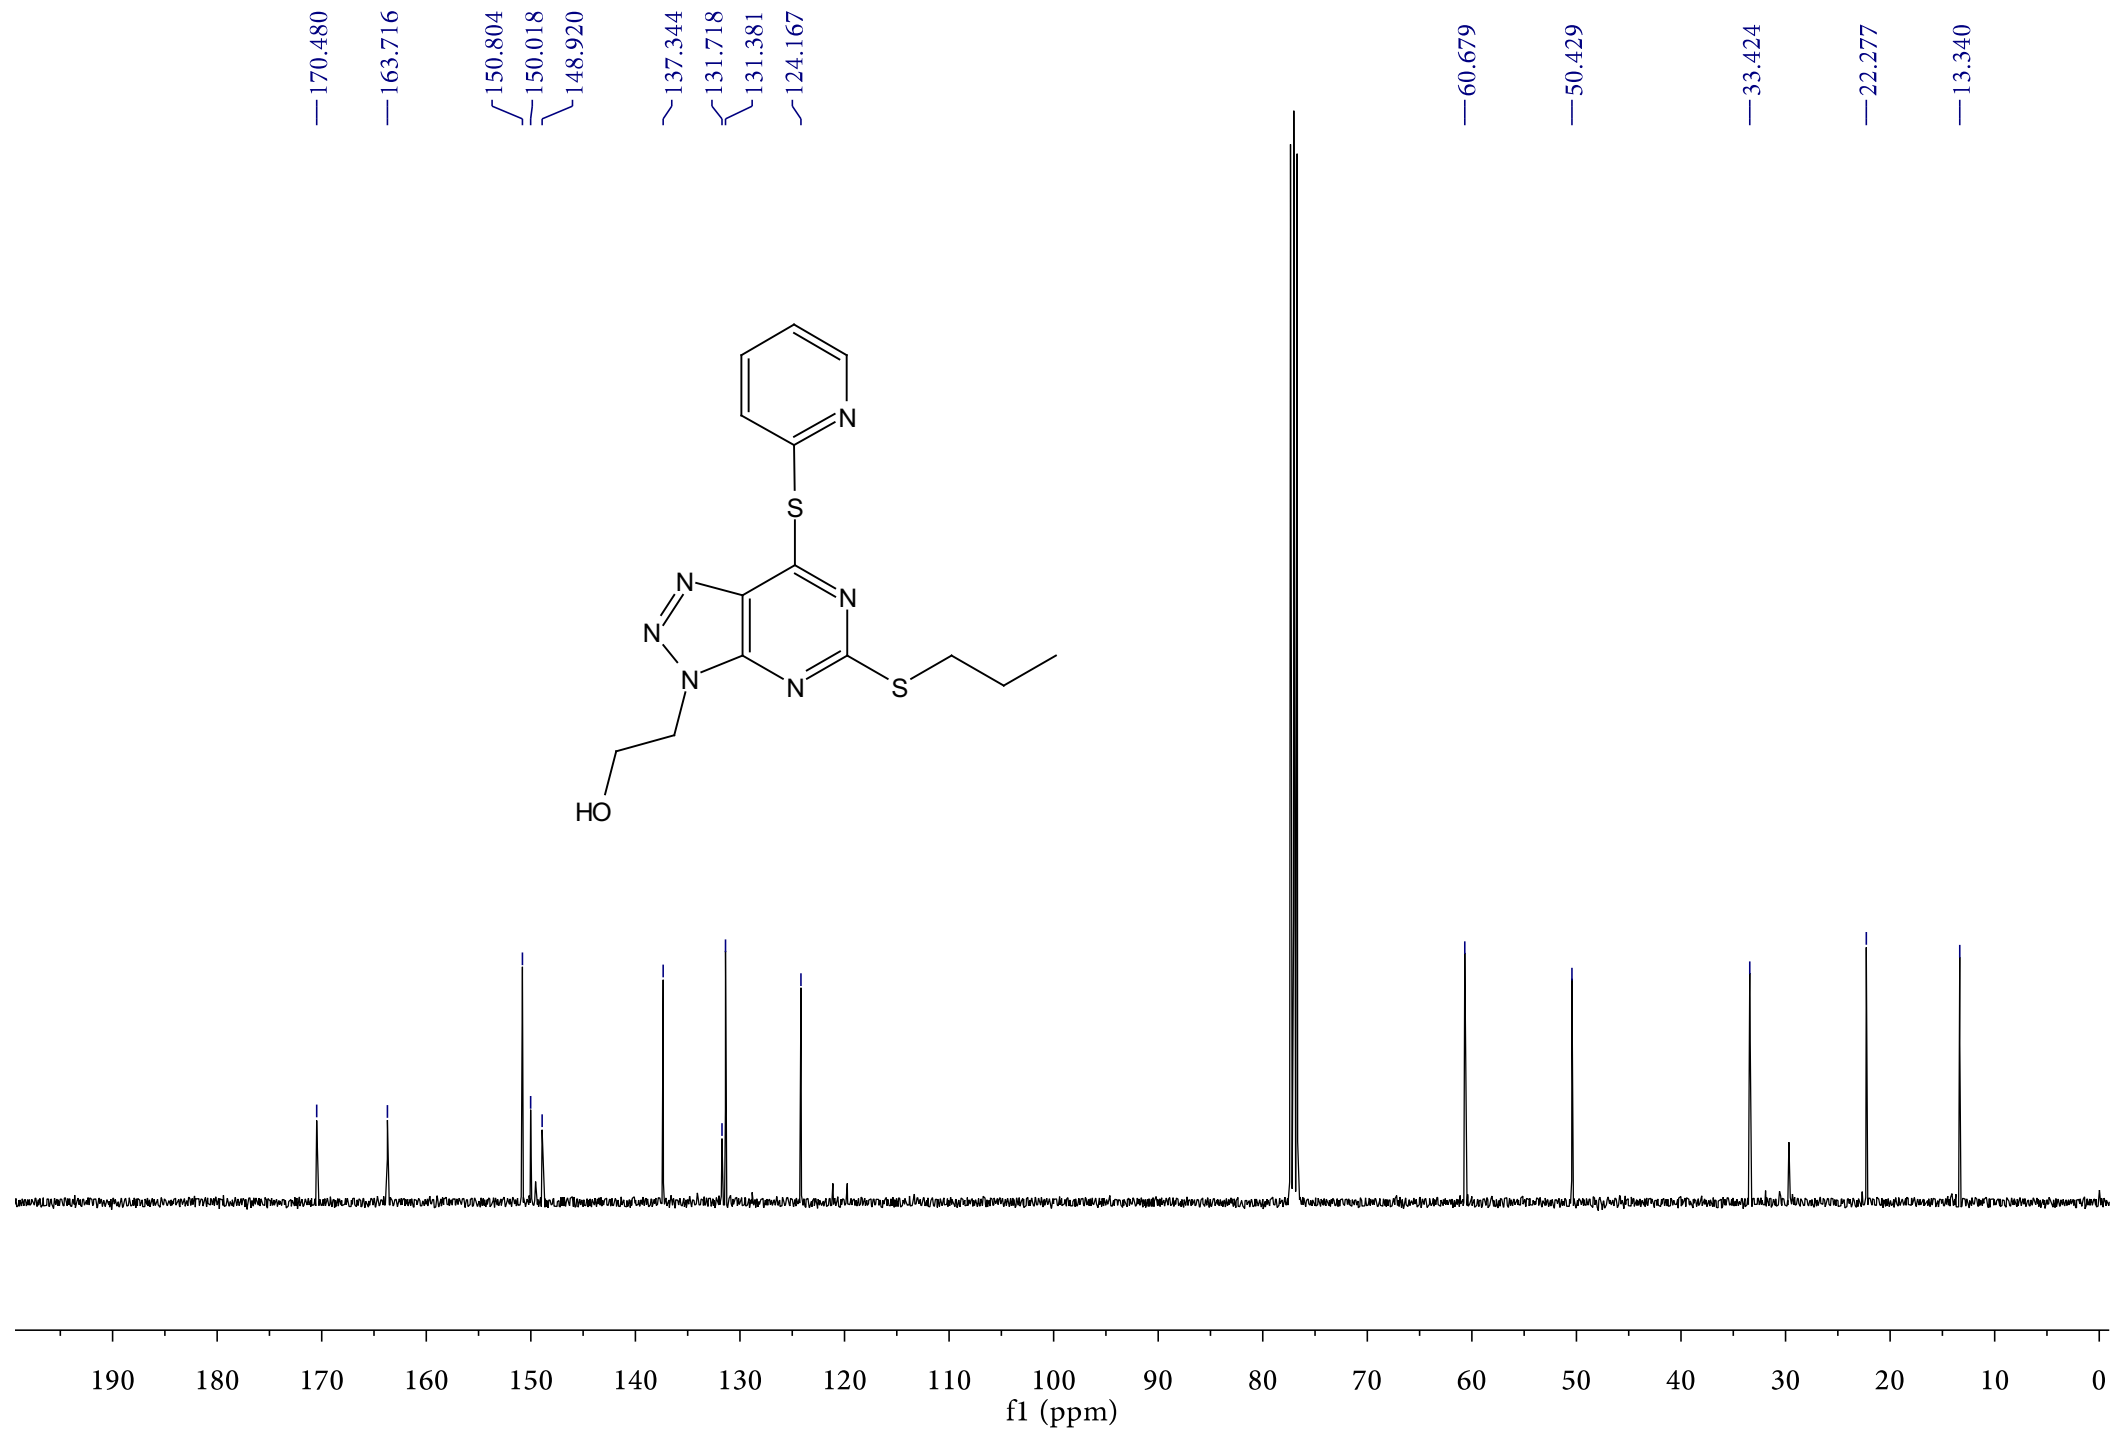

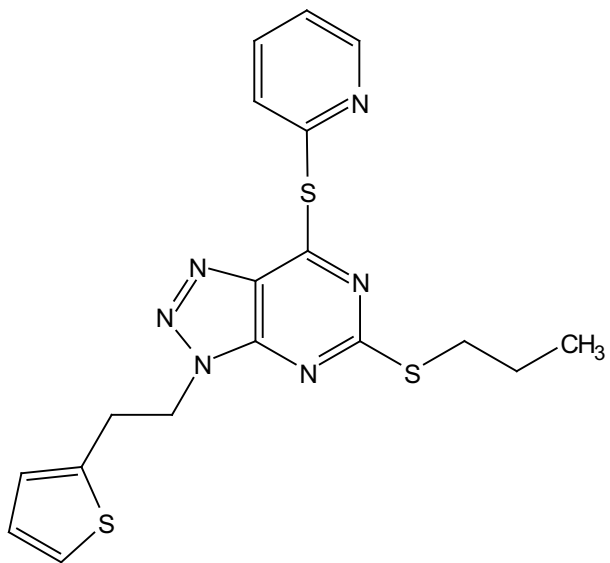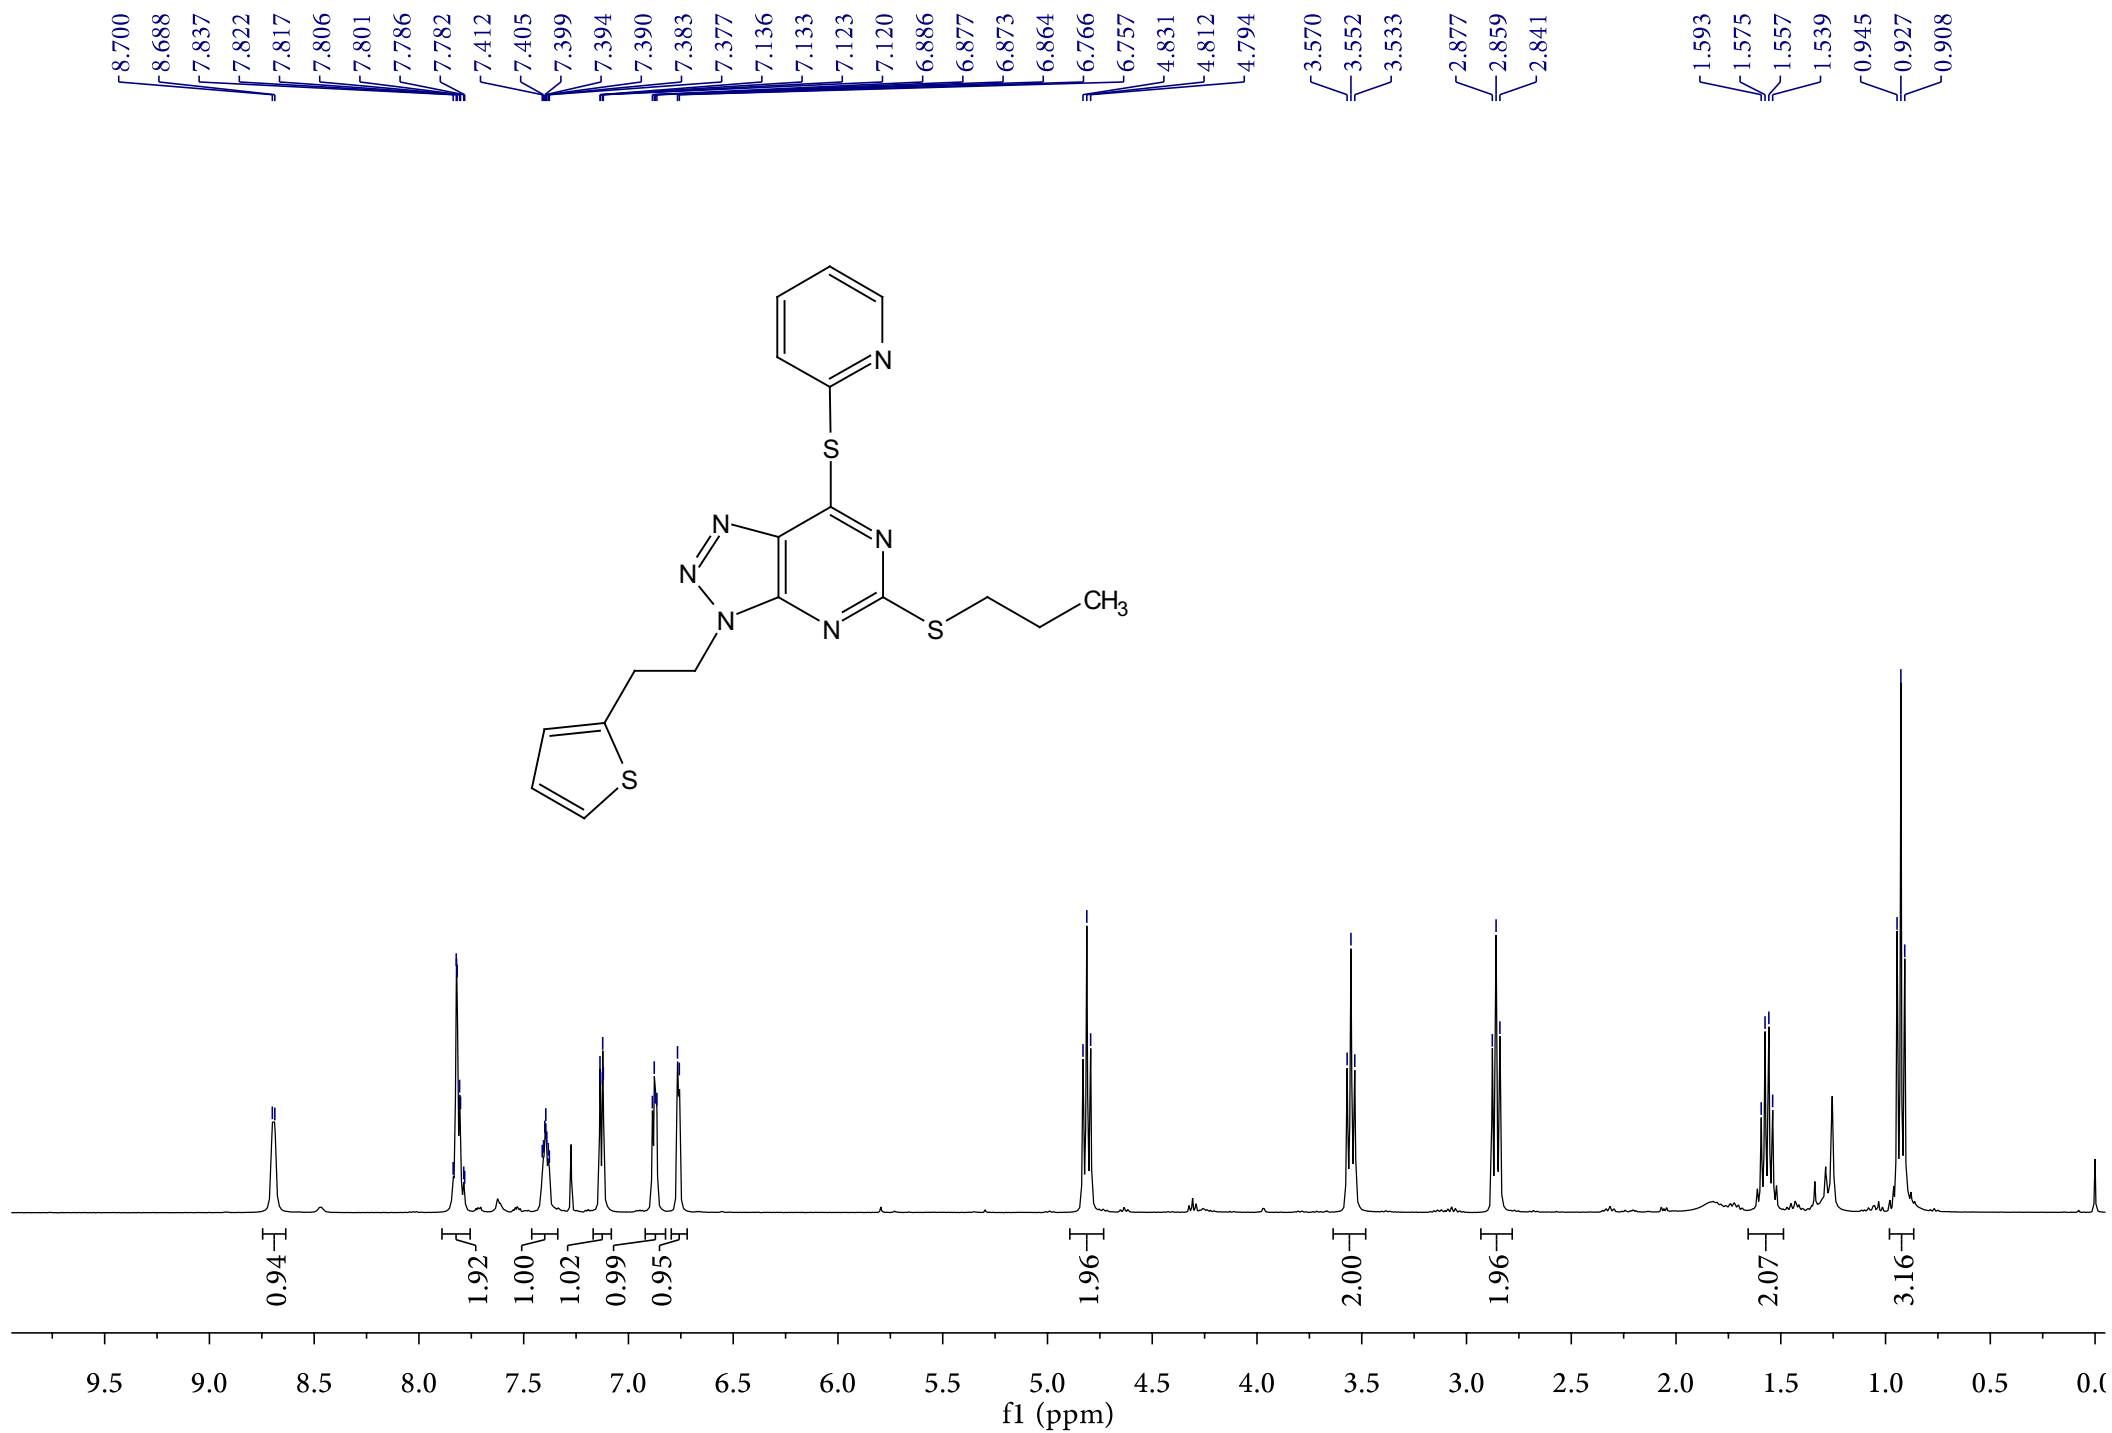

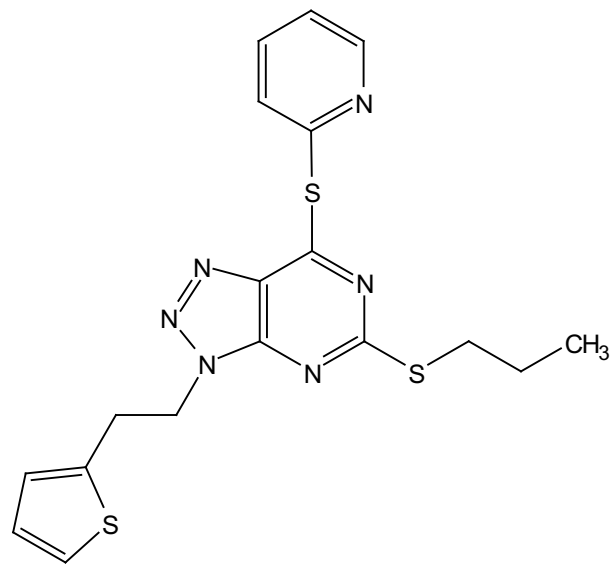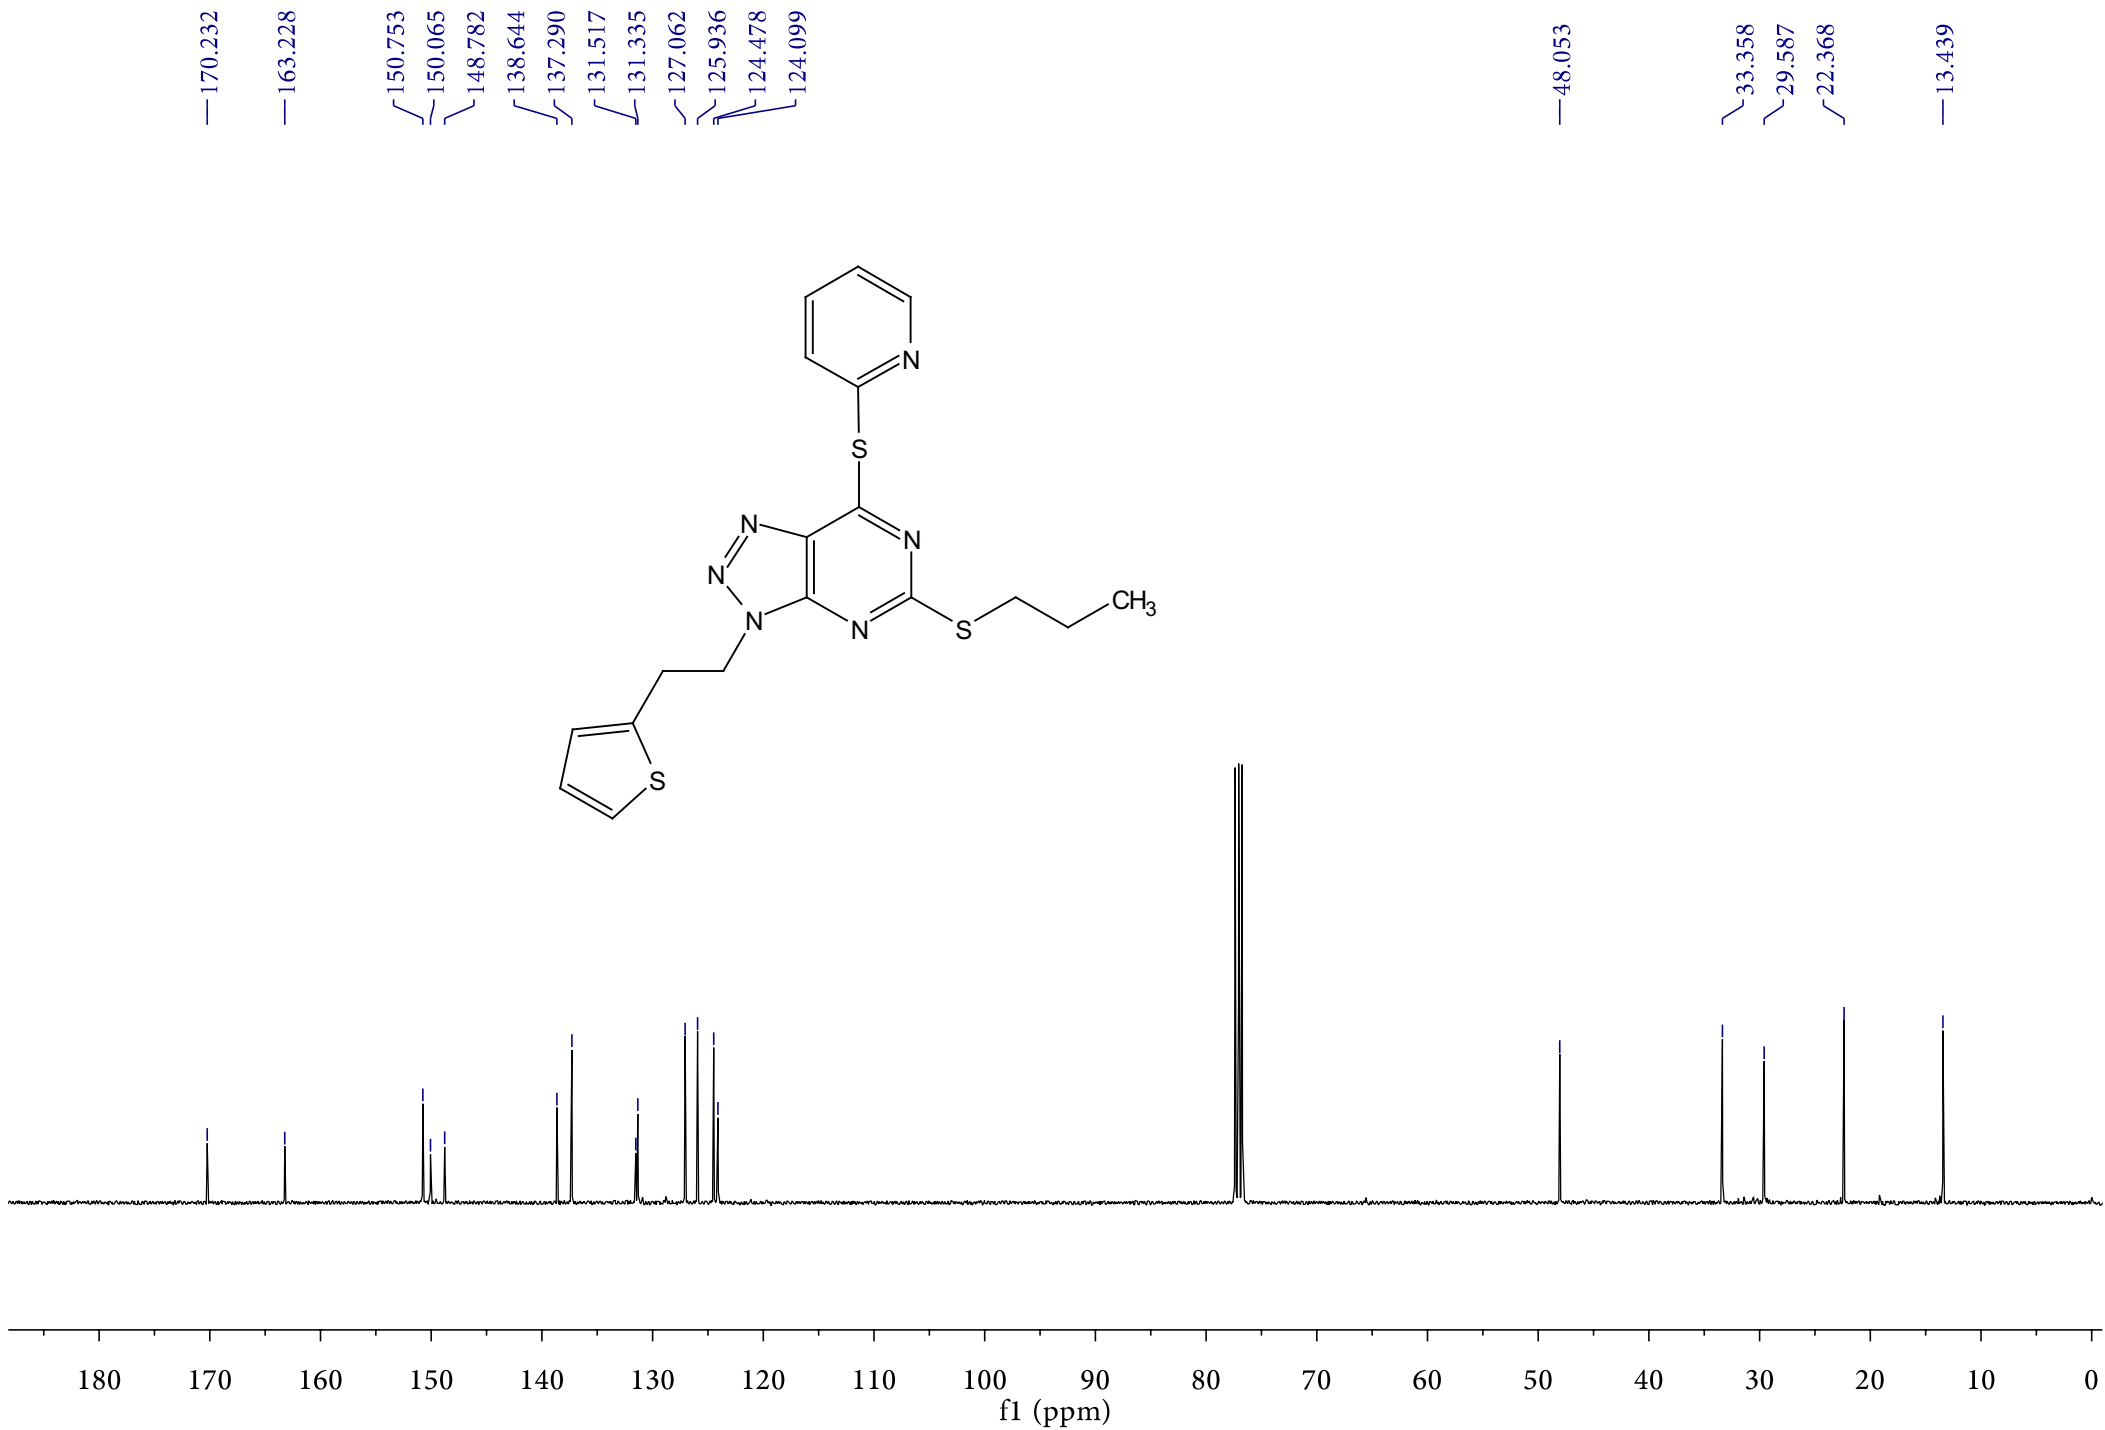



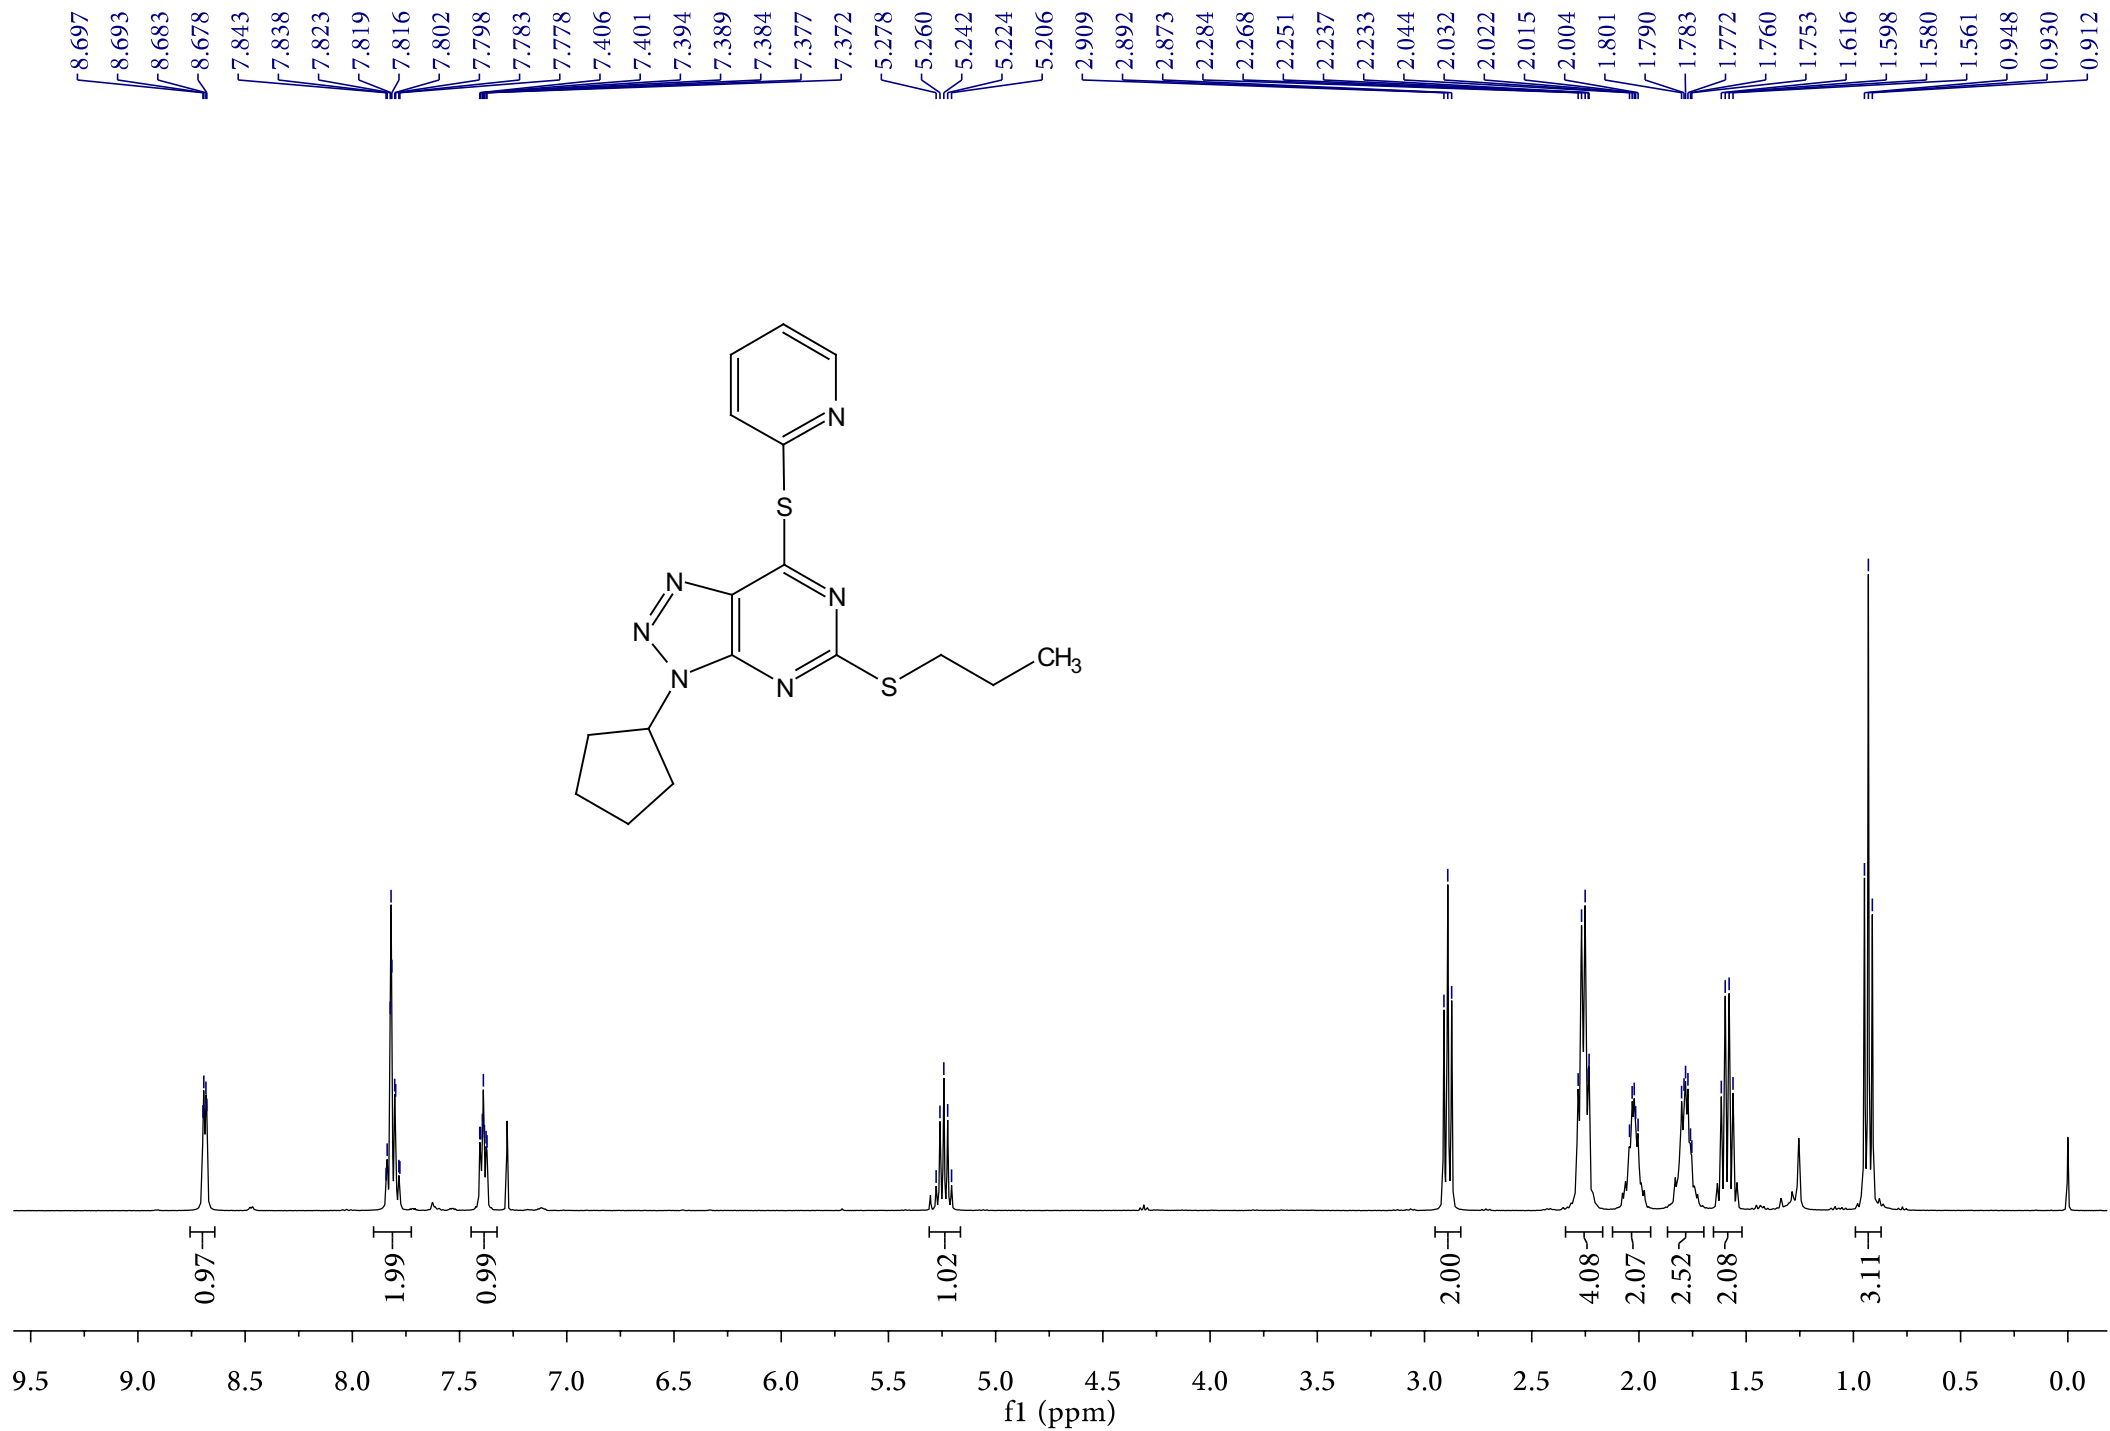

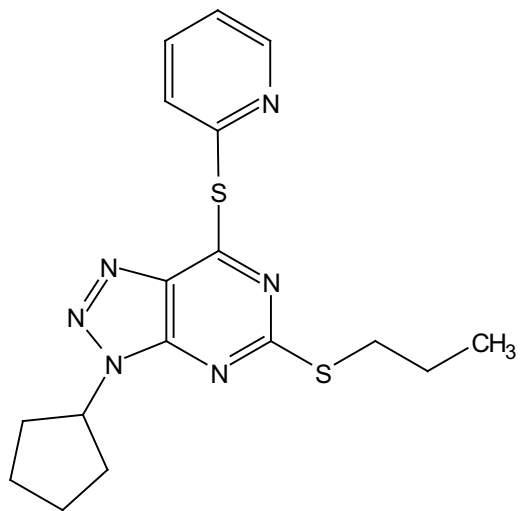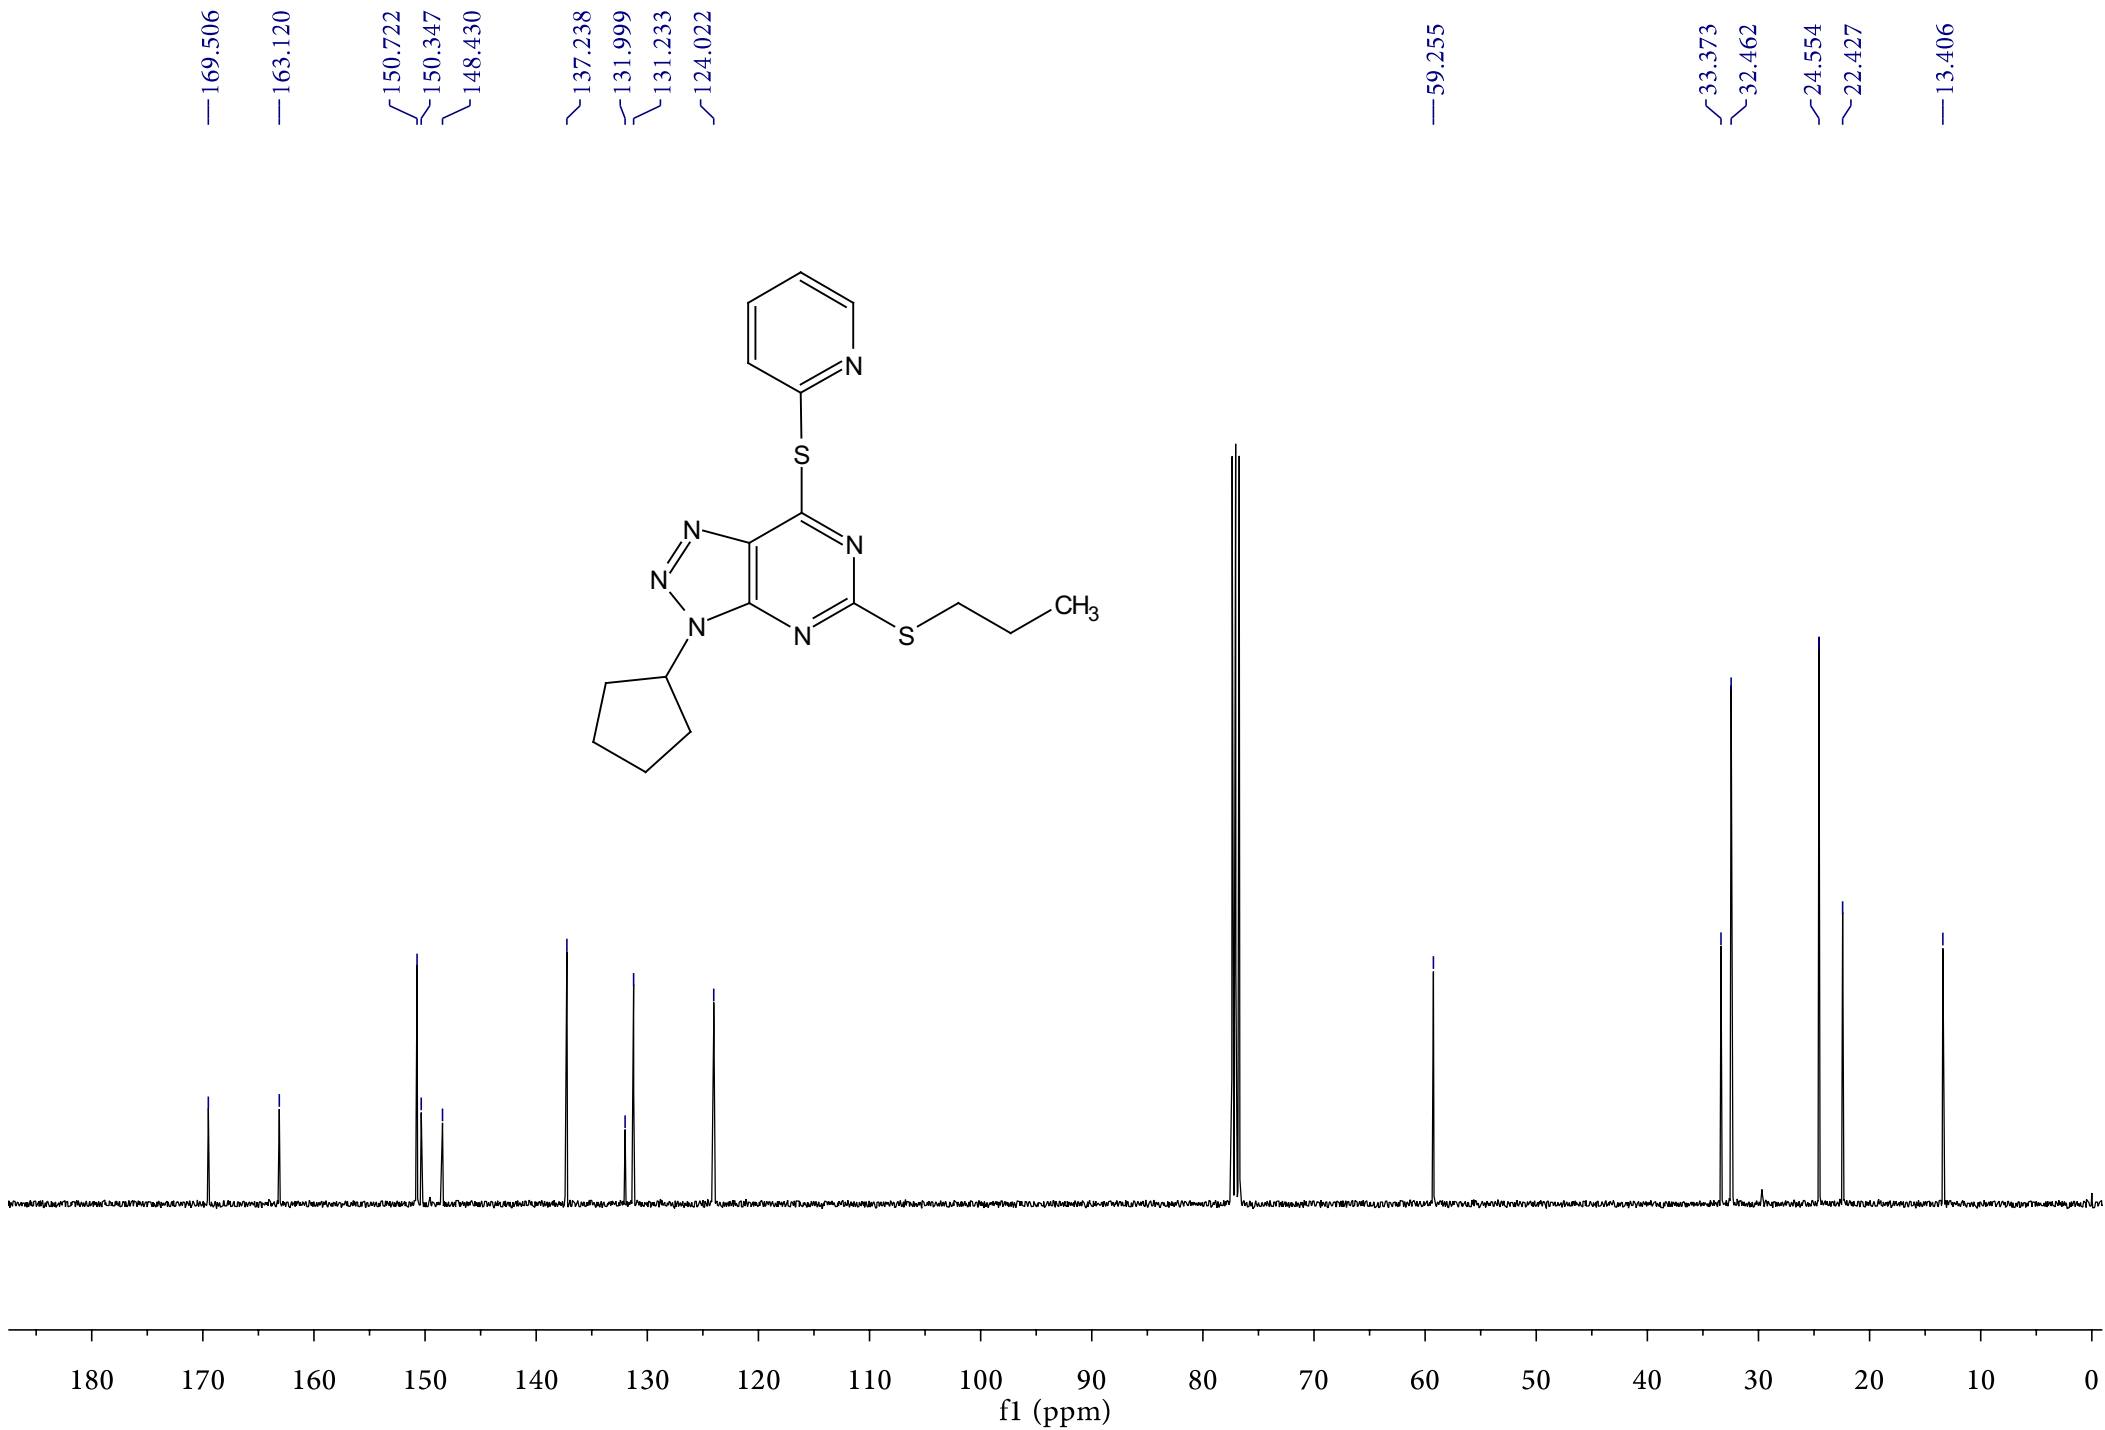

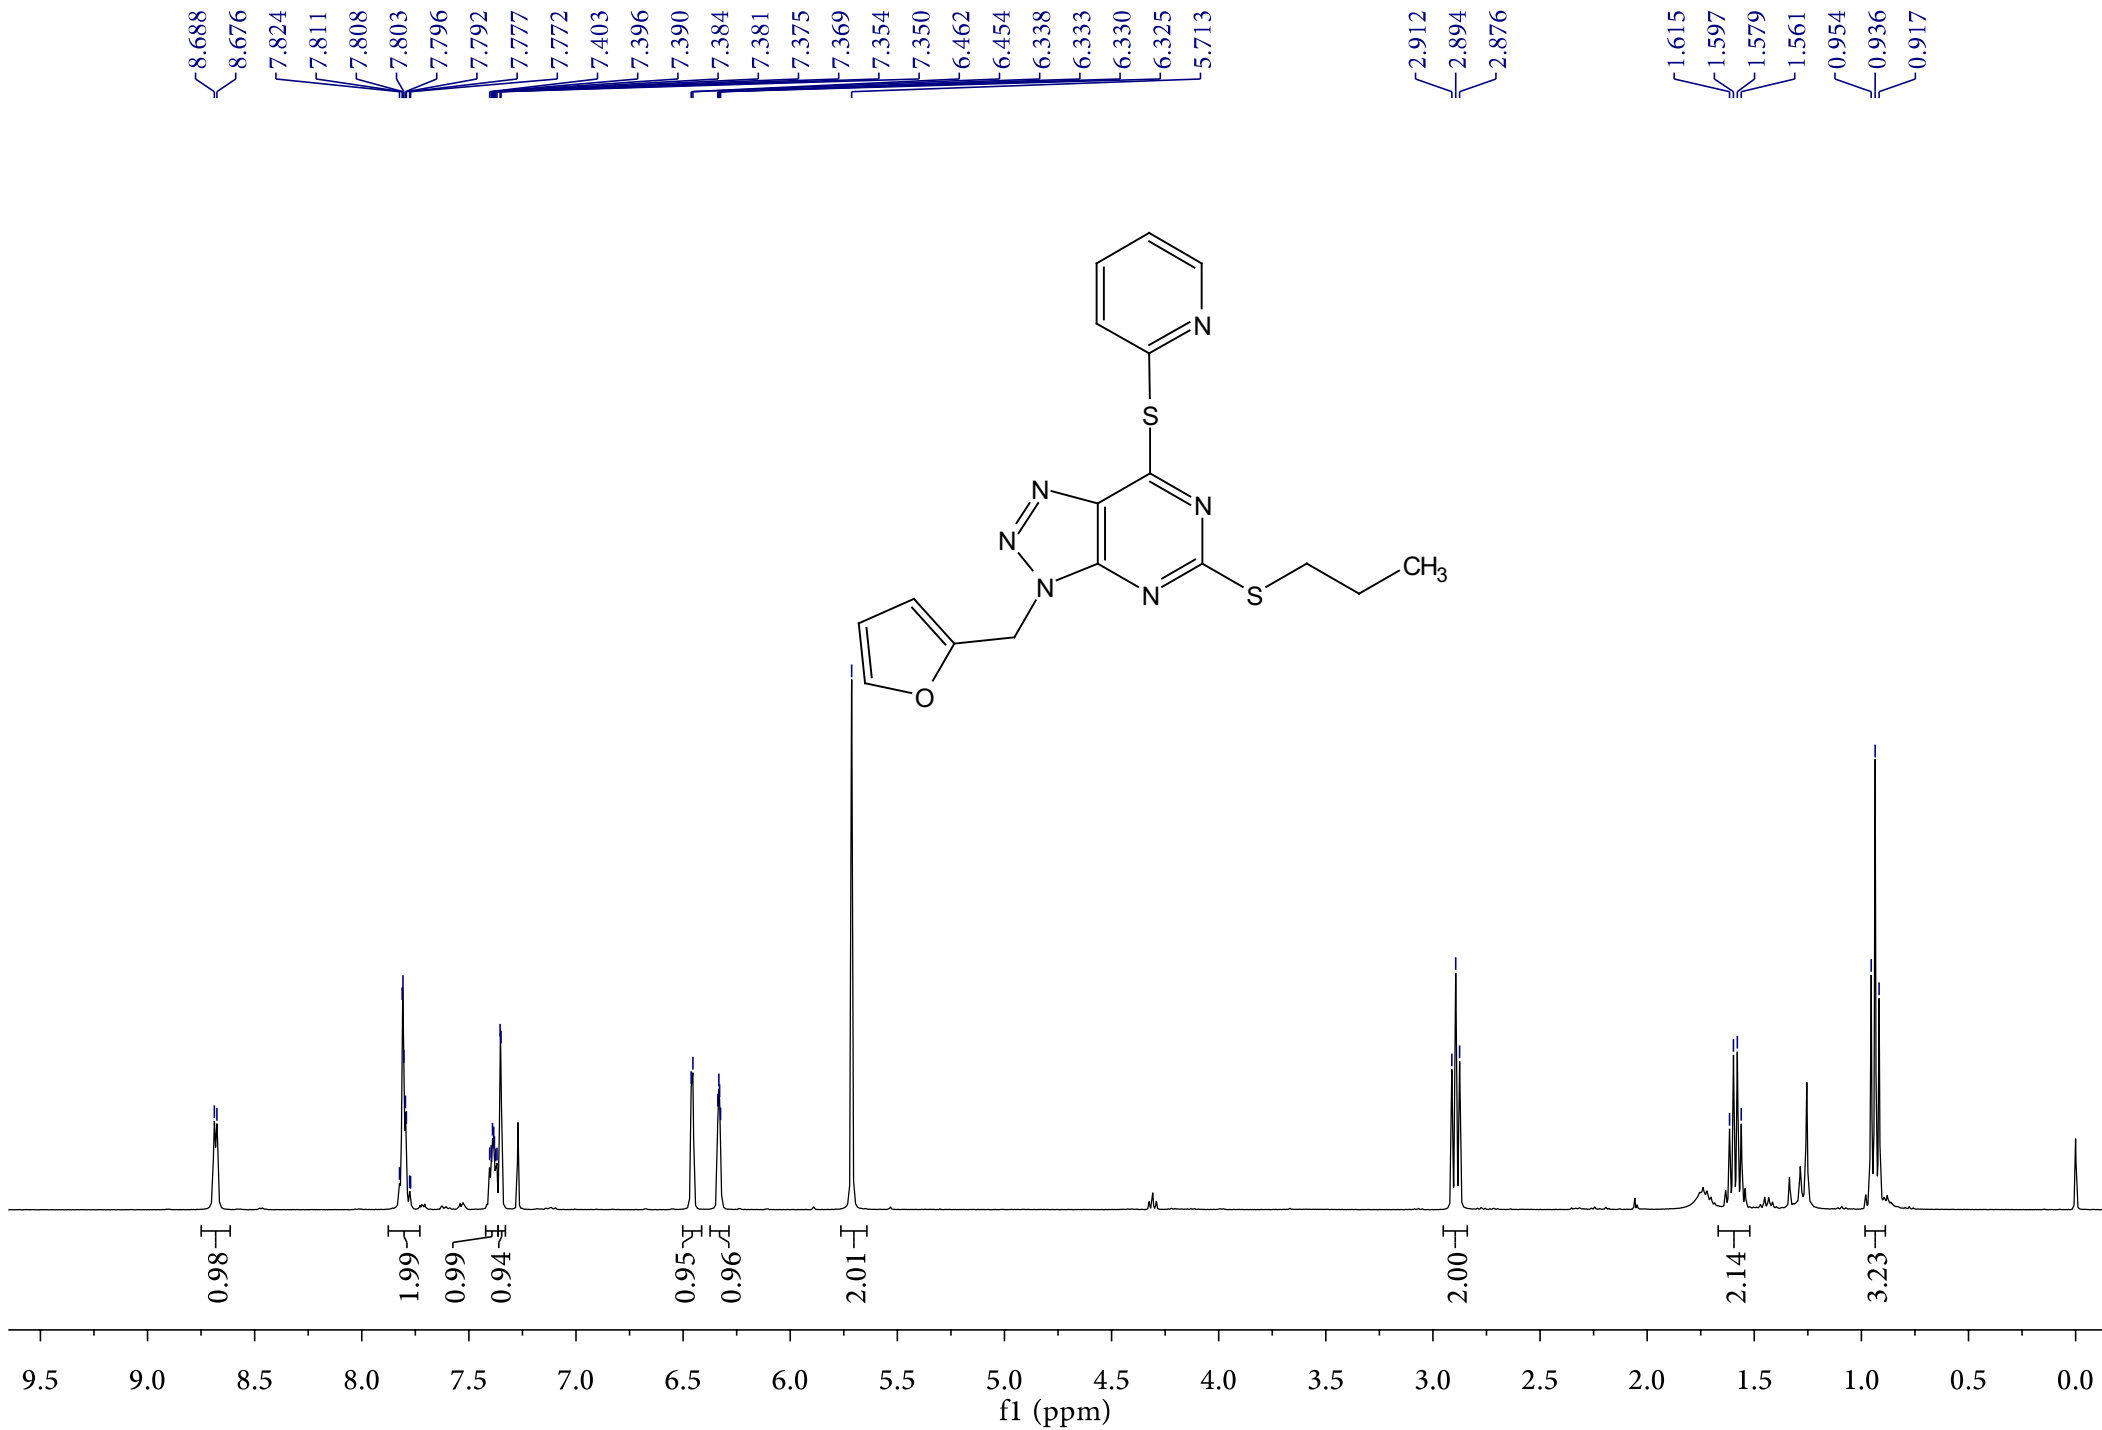

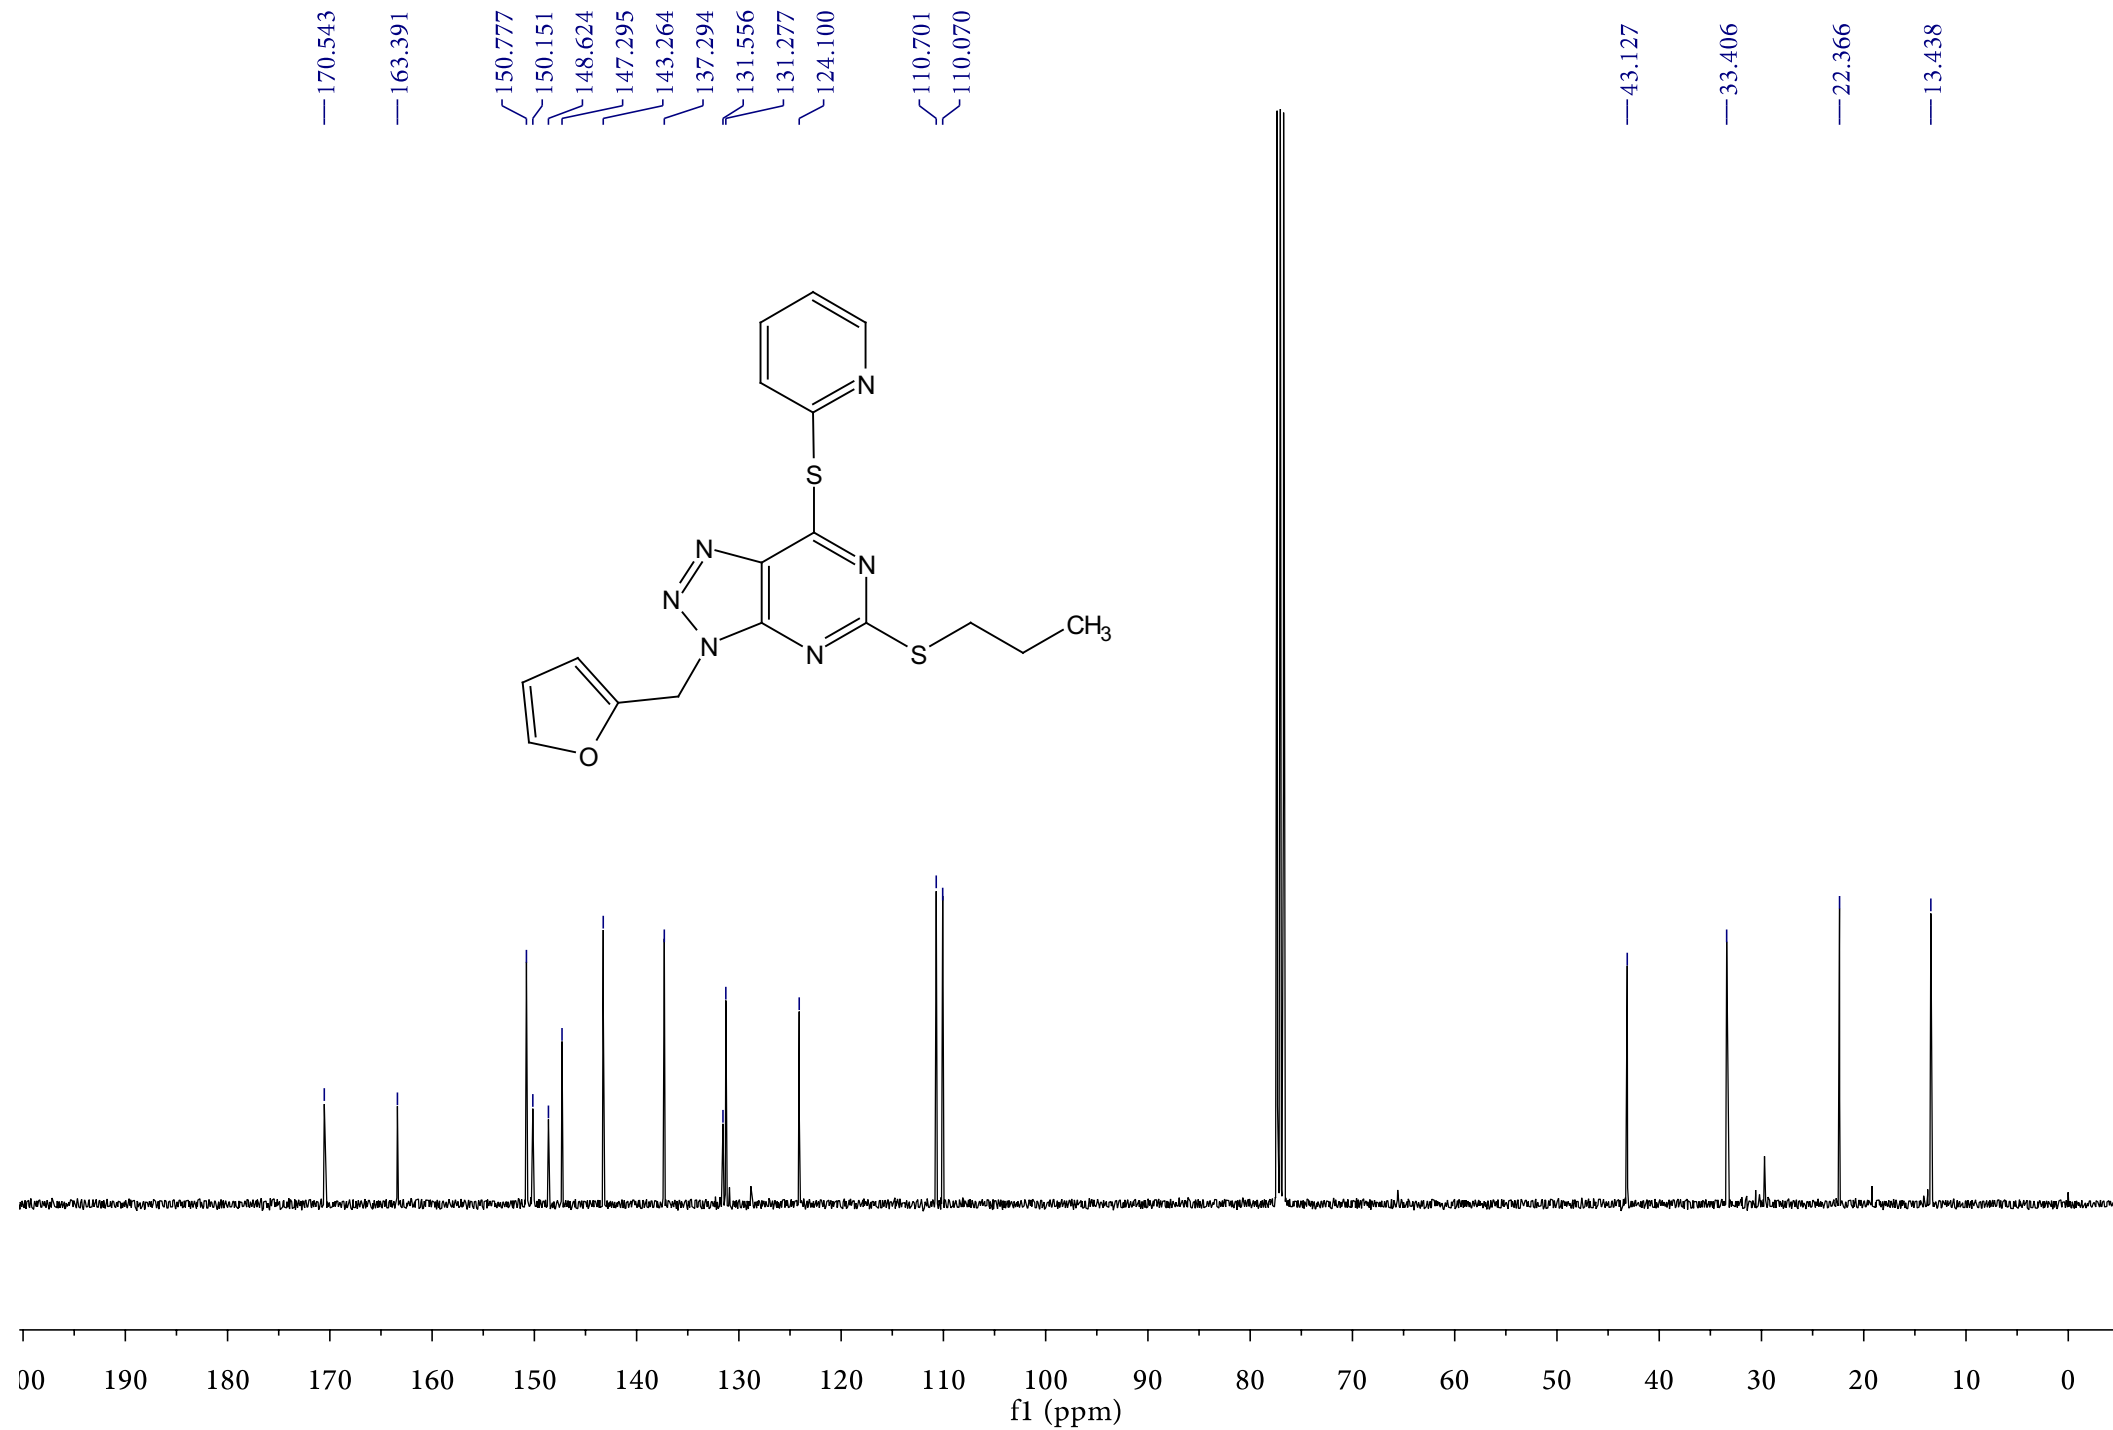

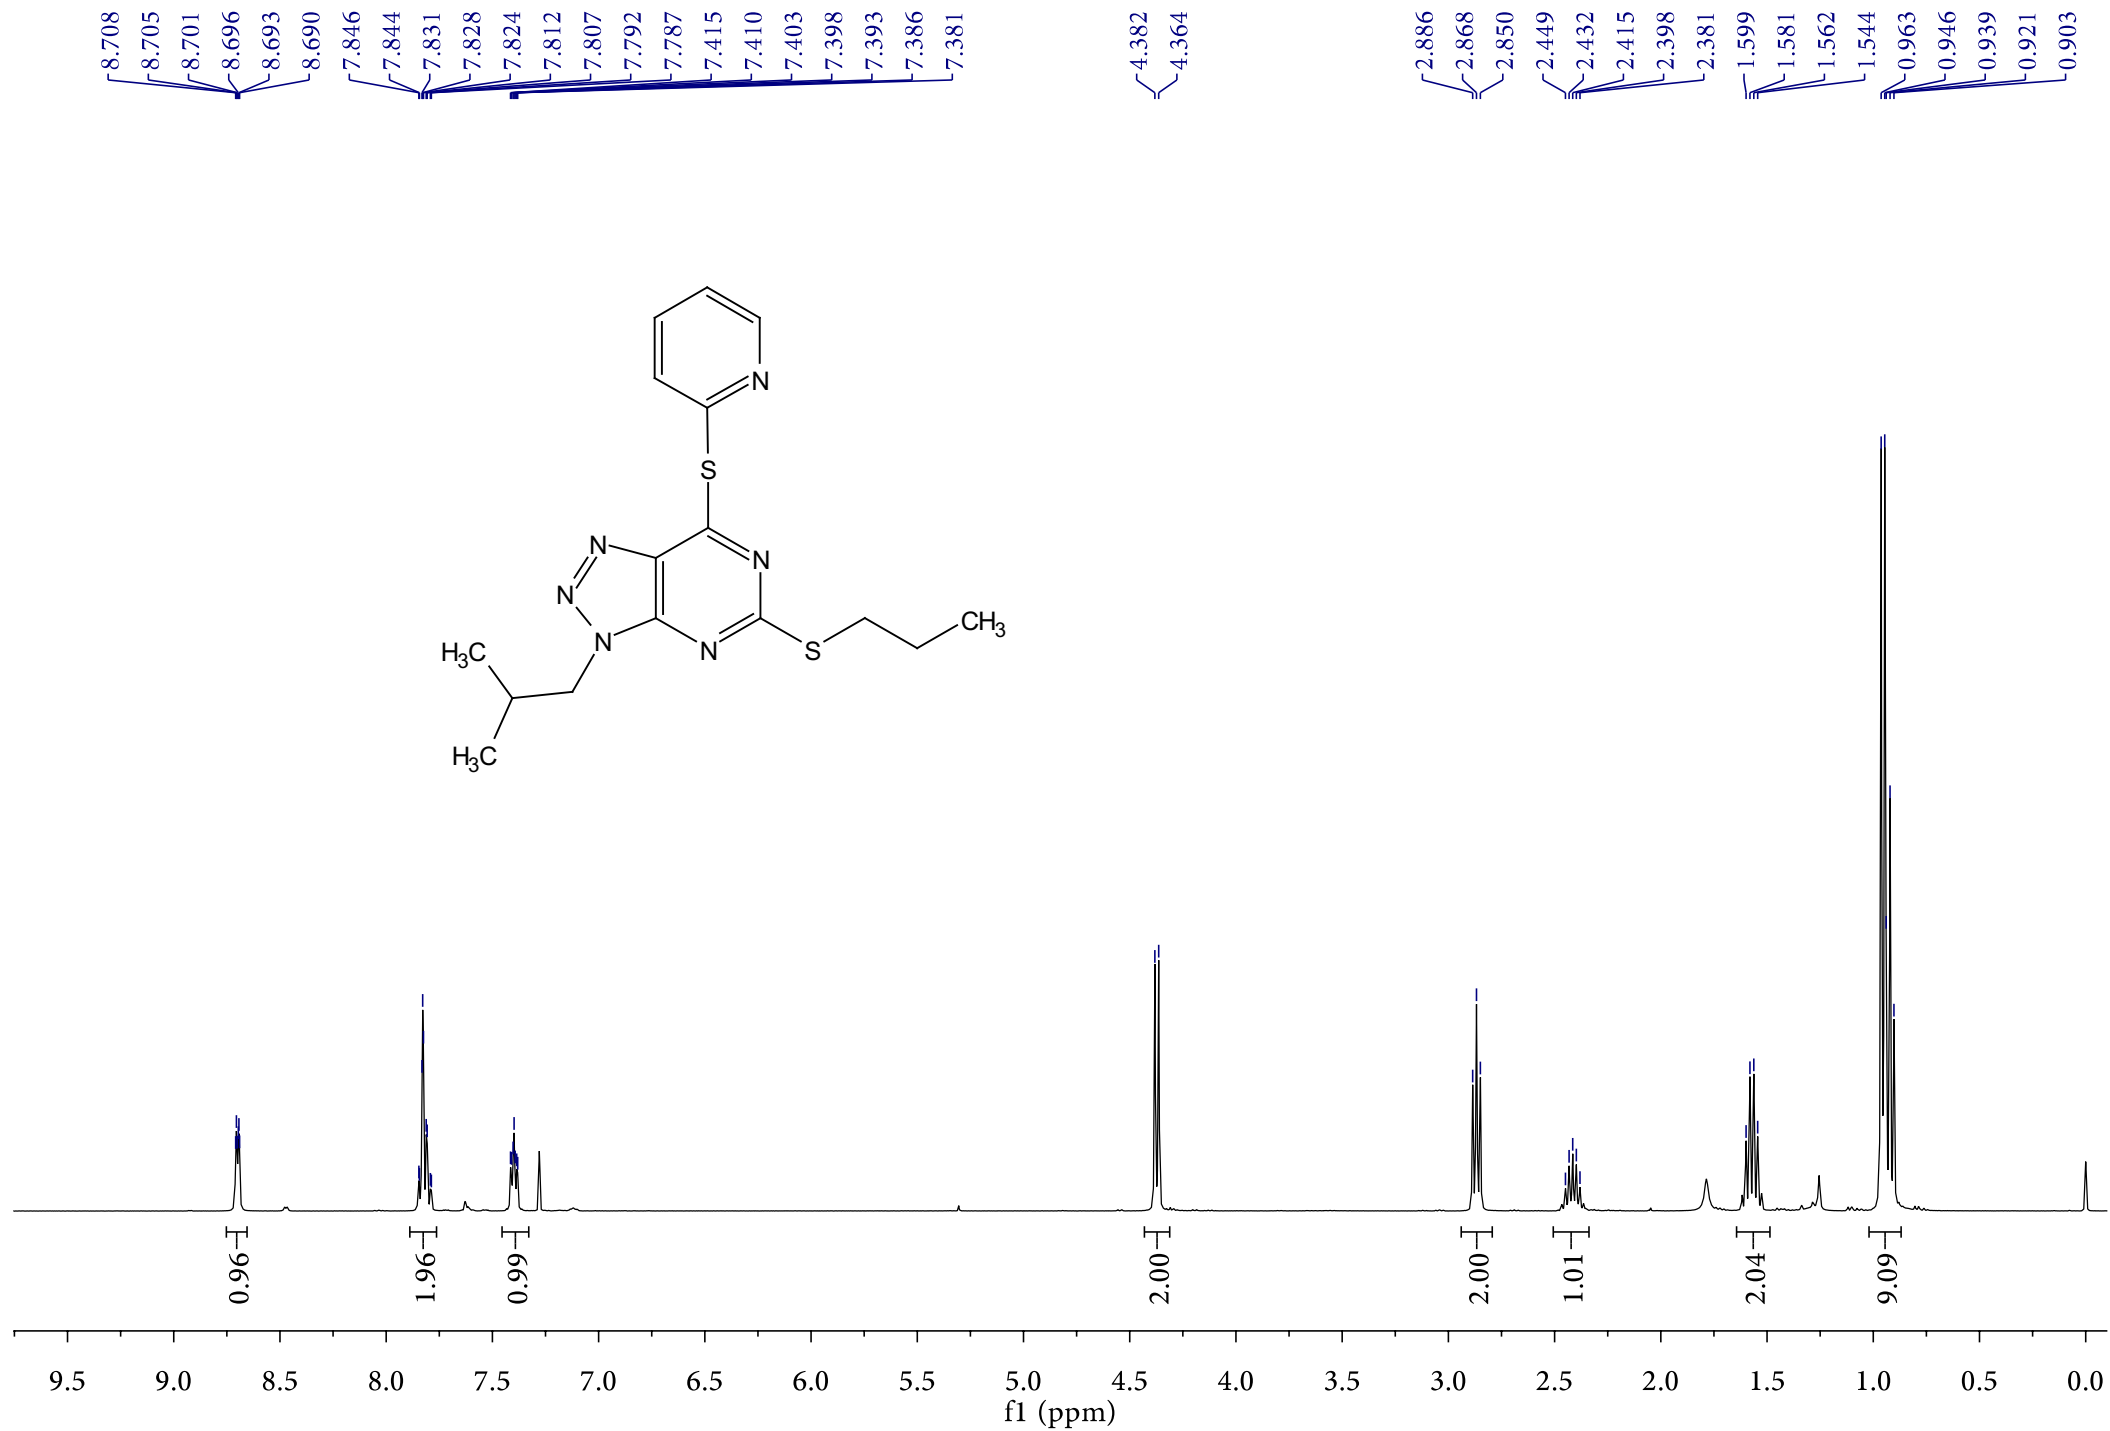

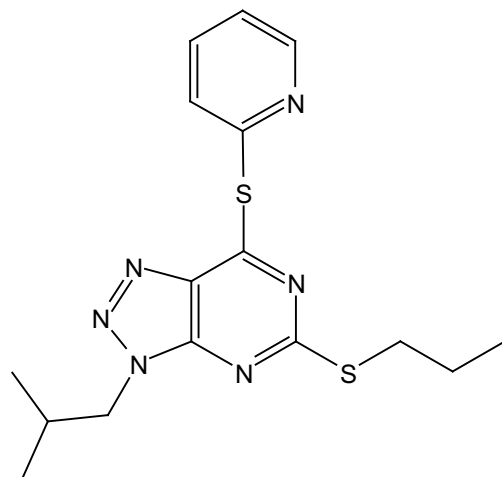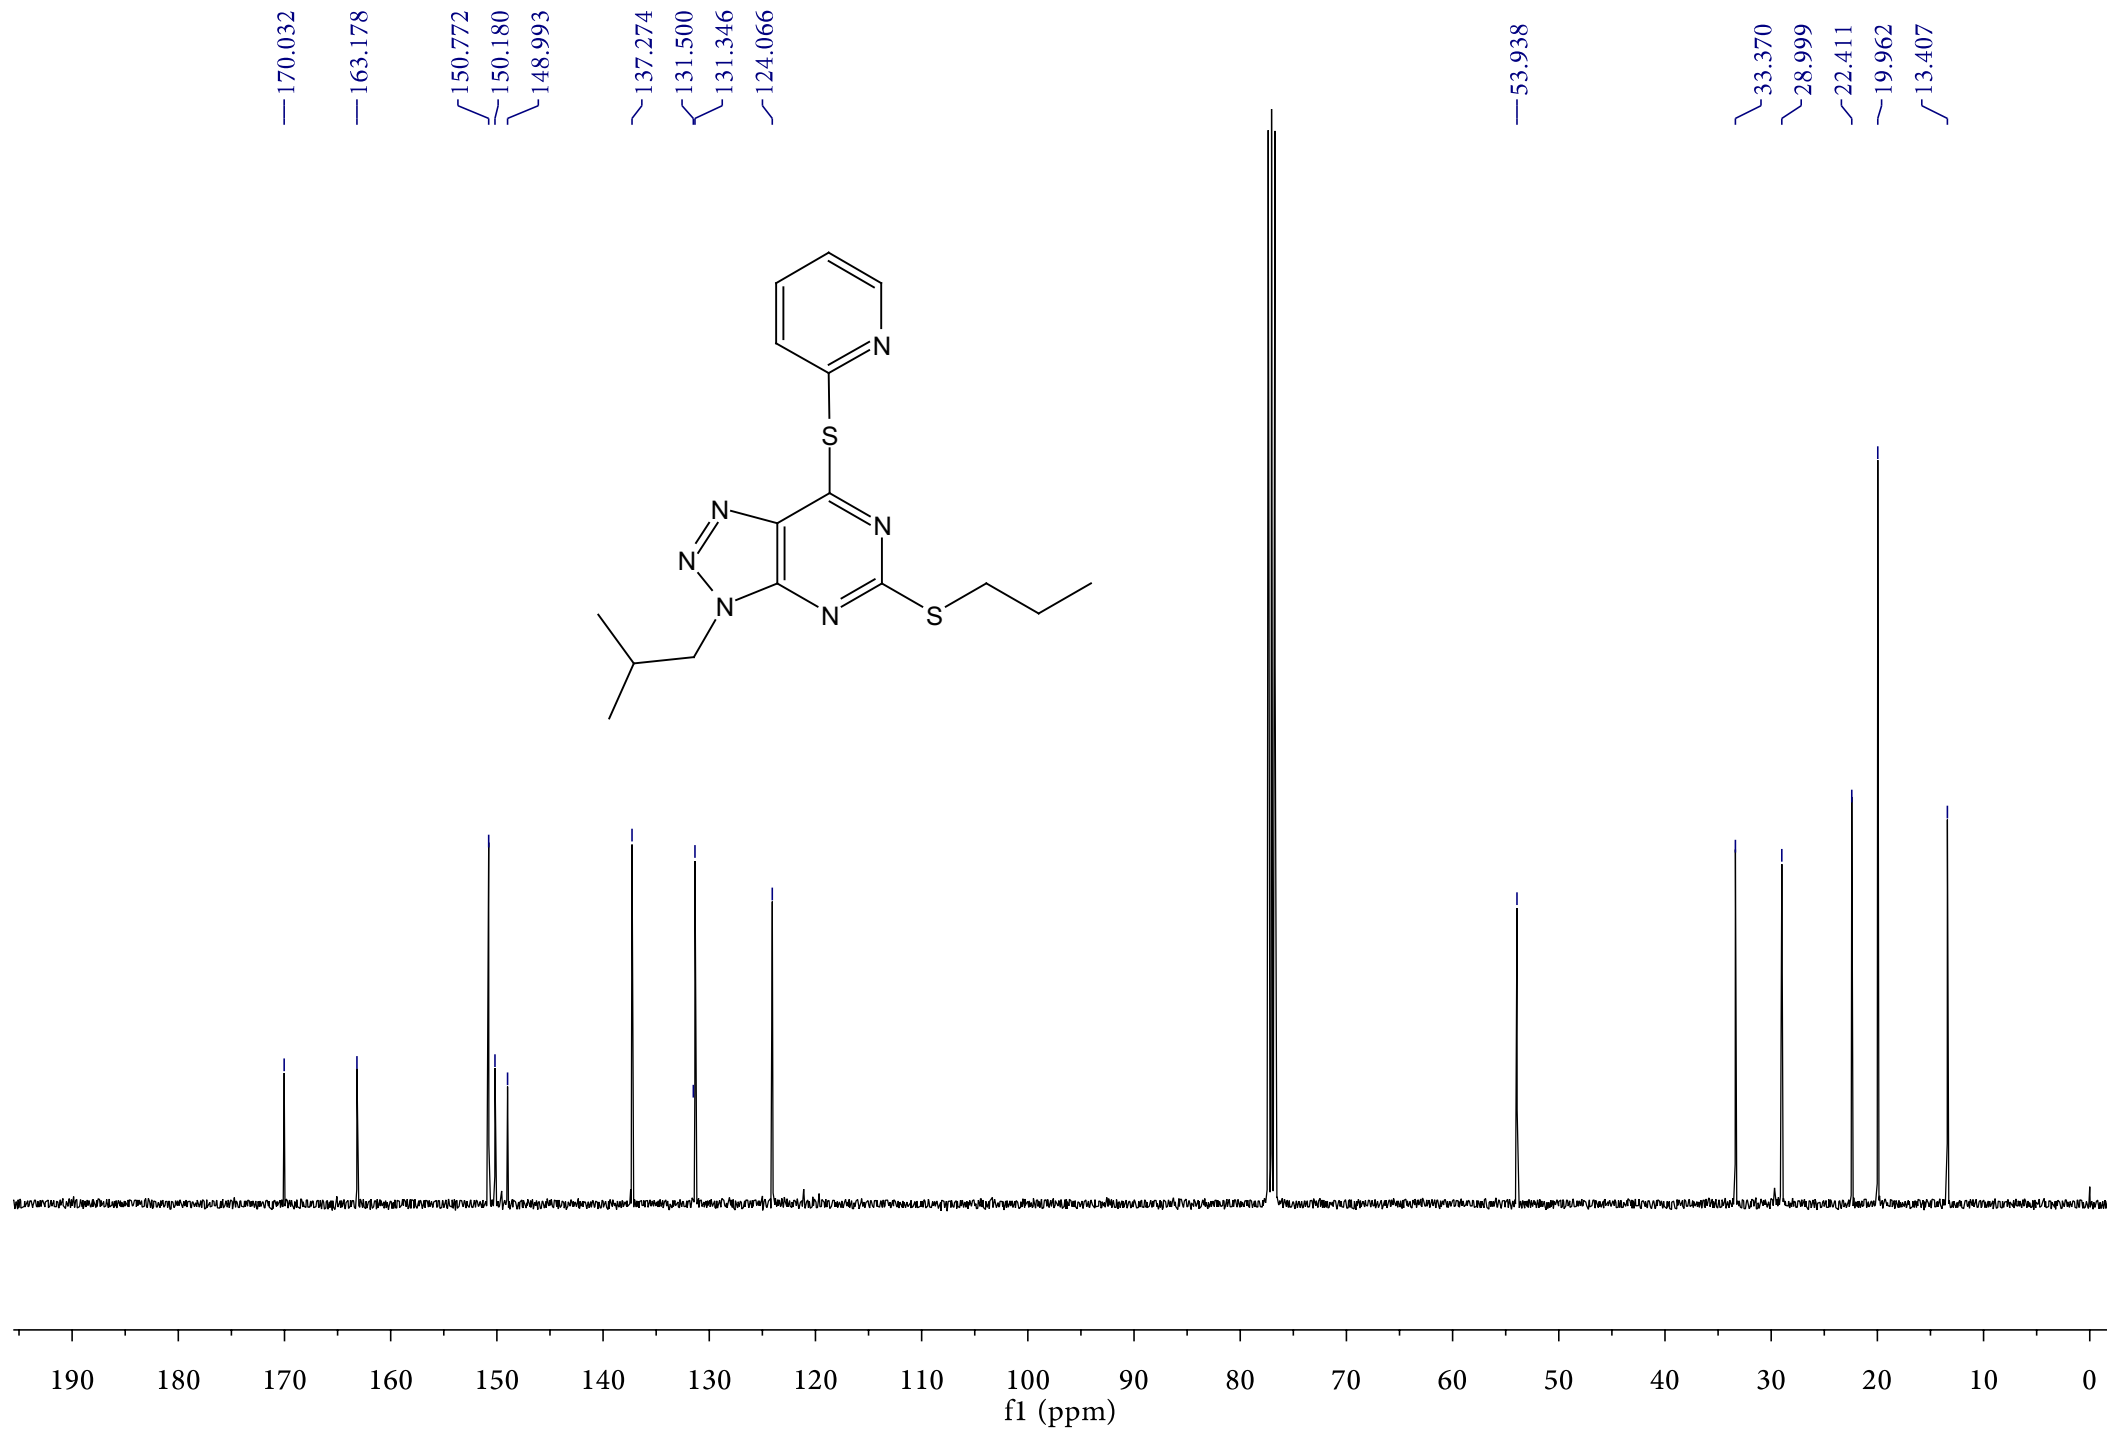

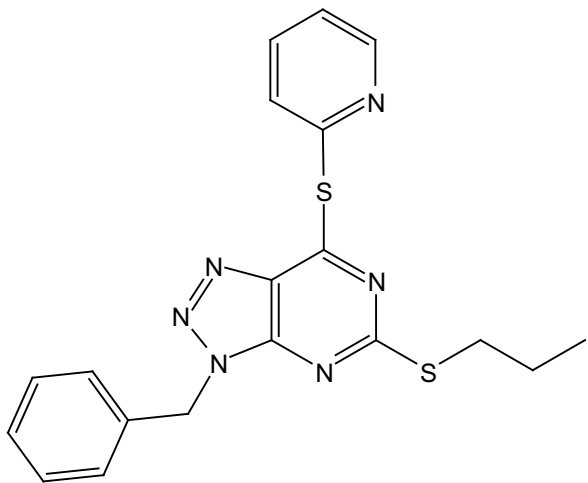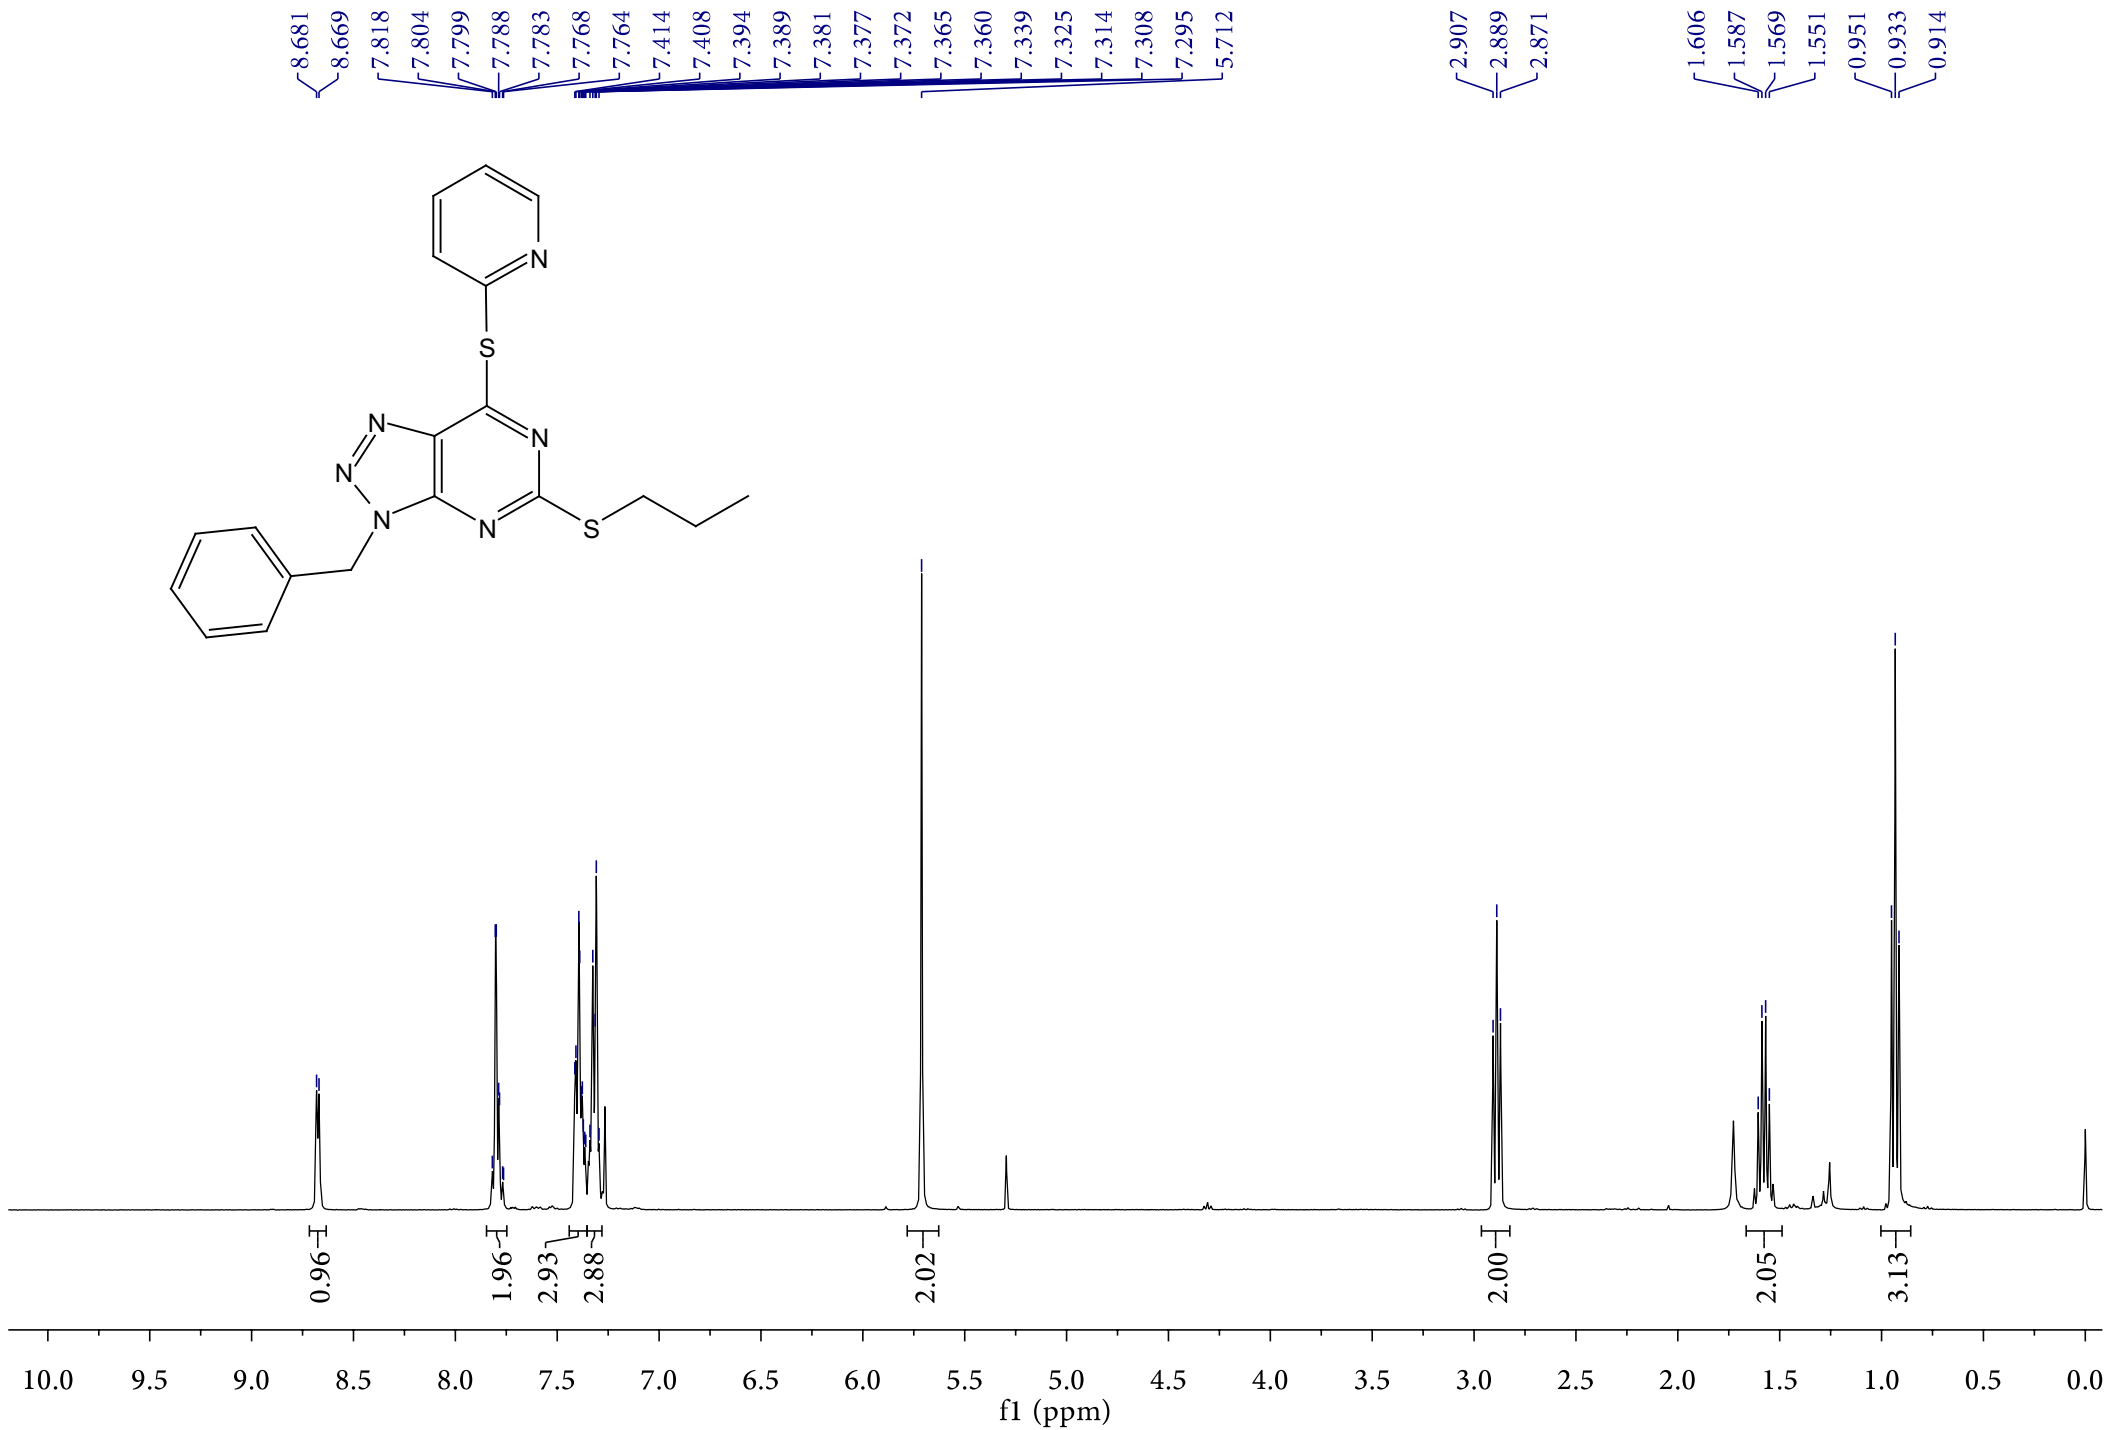

— 170.375

— 163.326

— 150.743

— 150.183

— 148.625

— 137.255

— 134.483

— 131.664

— 131.214

— 128.845

— 128.532

— 128.406

— 124.054

— 50.525

— 33.367

— 22.372

— 13.445

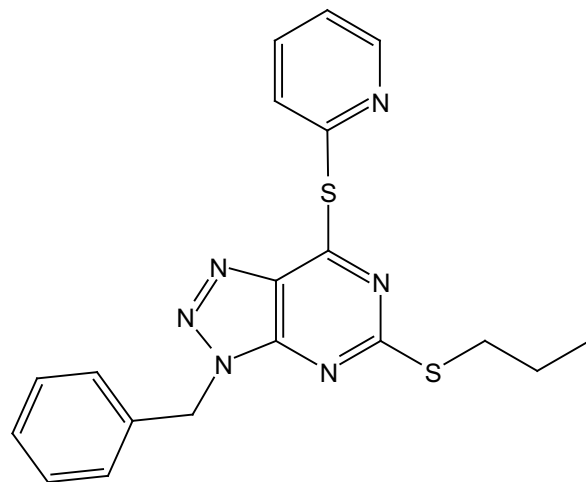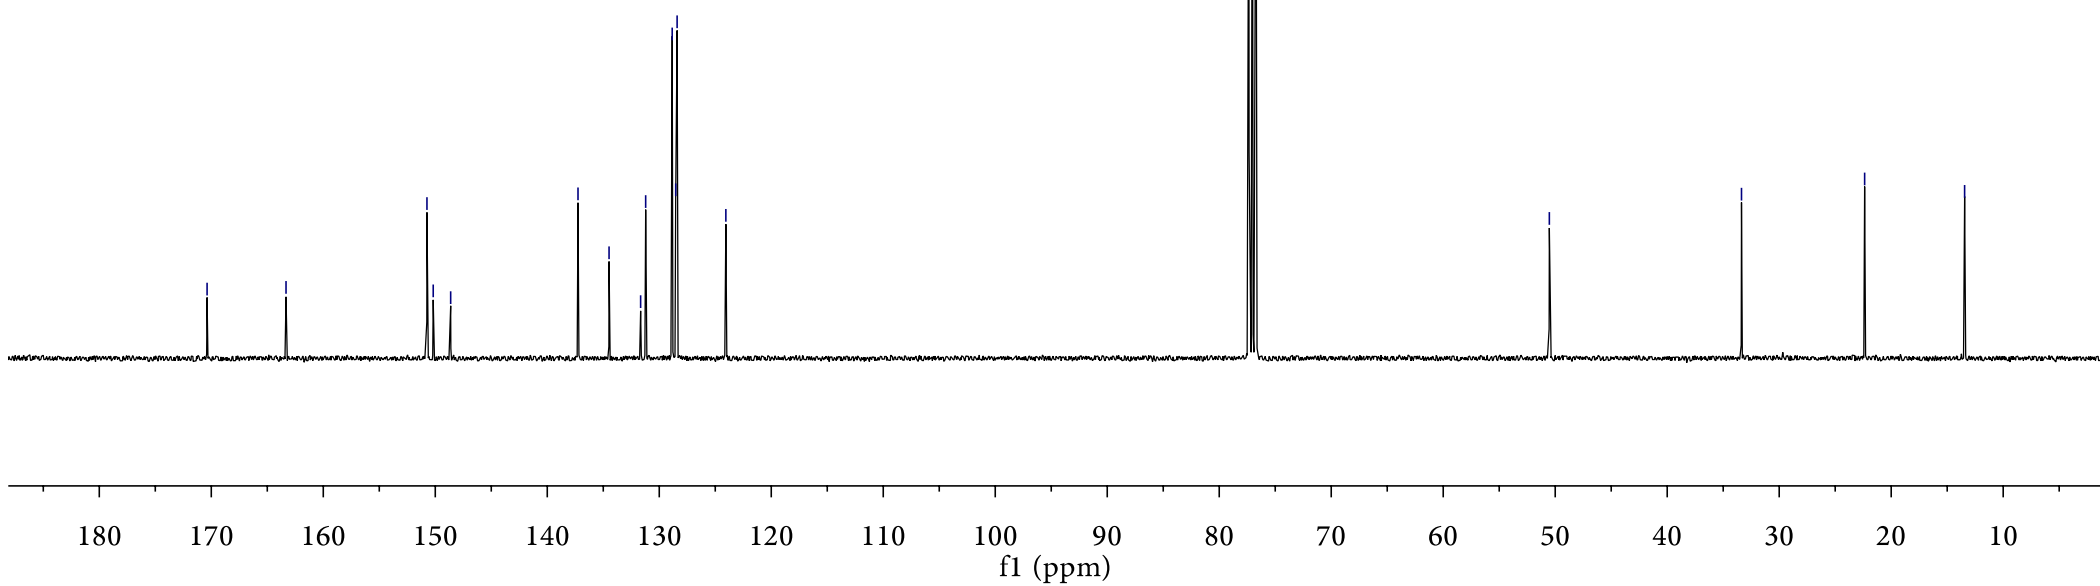



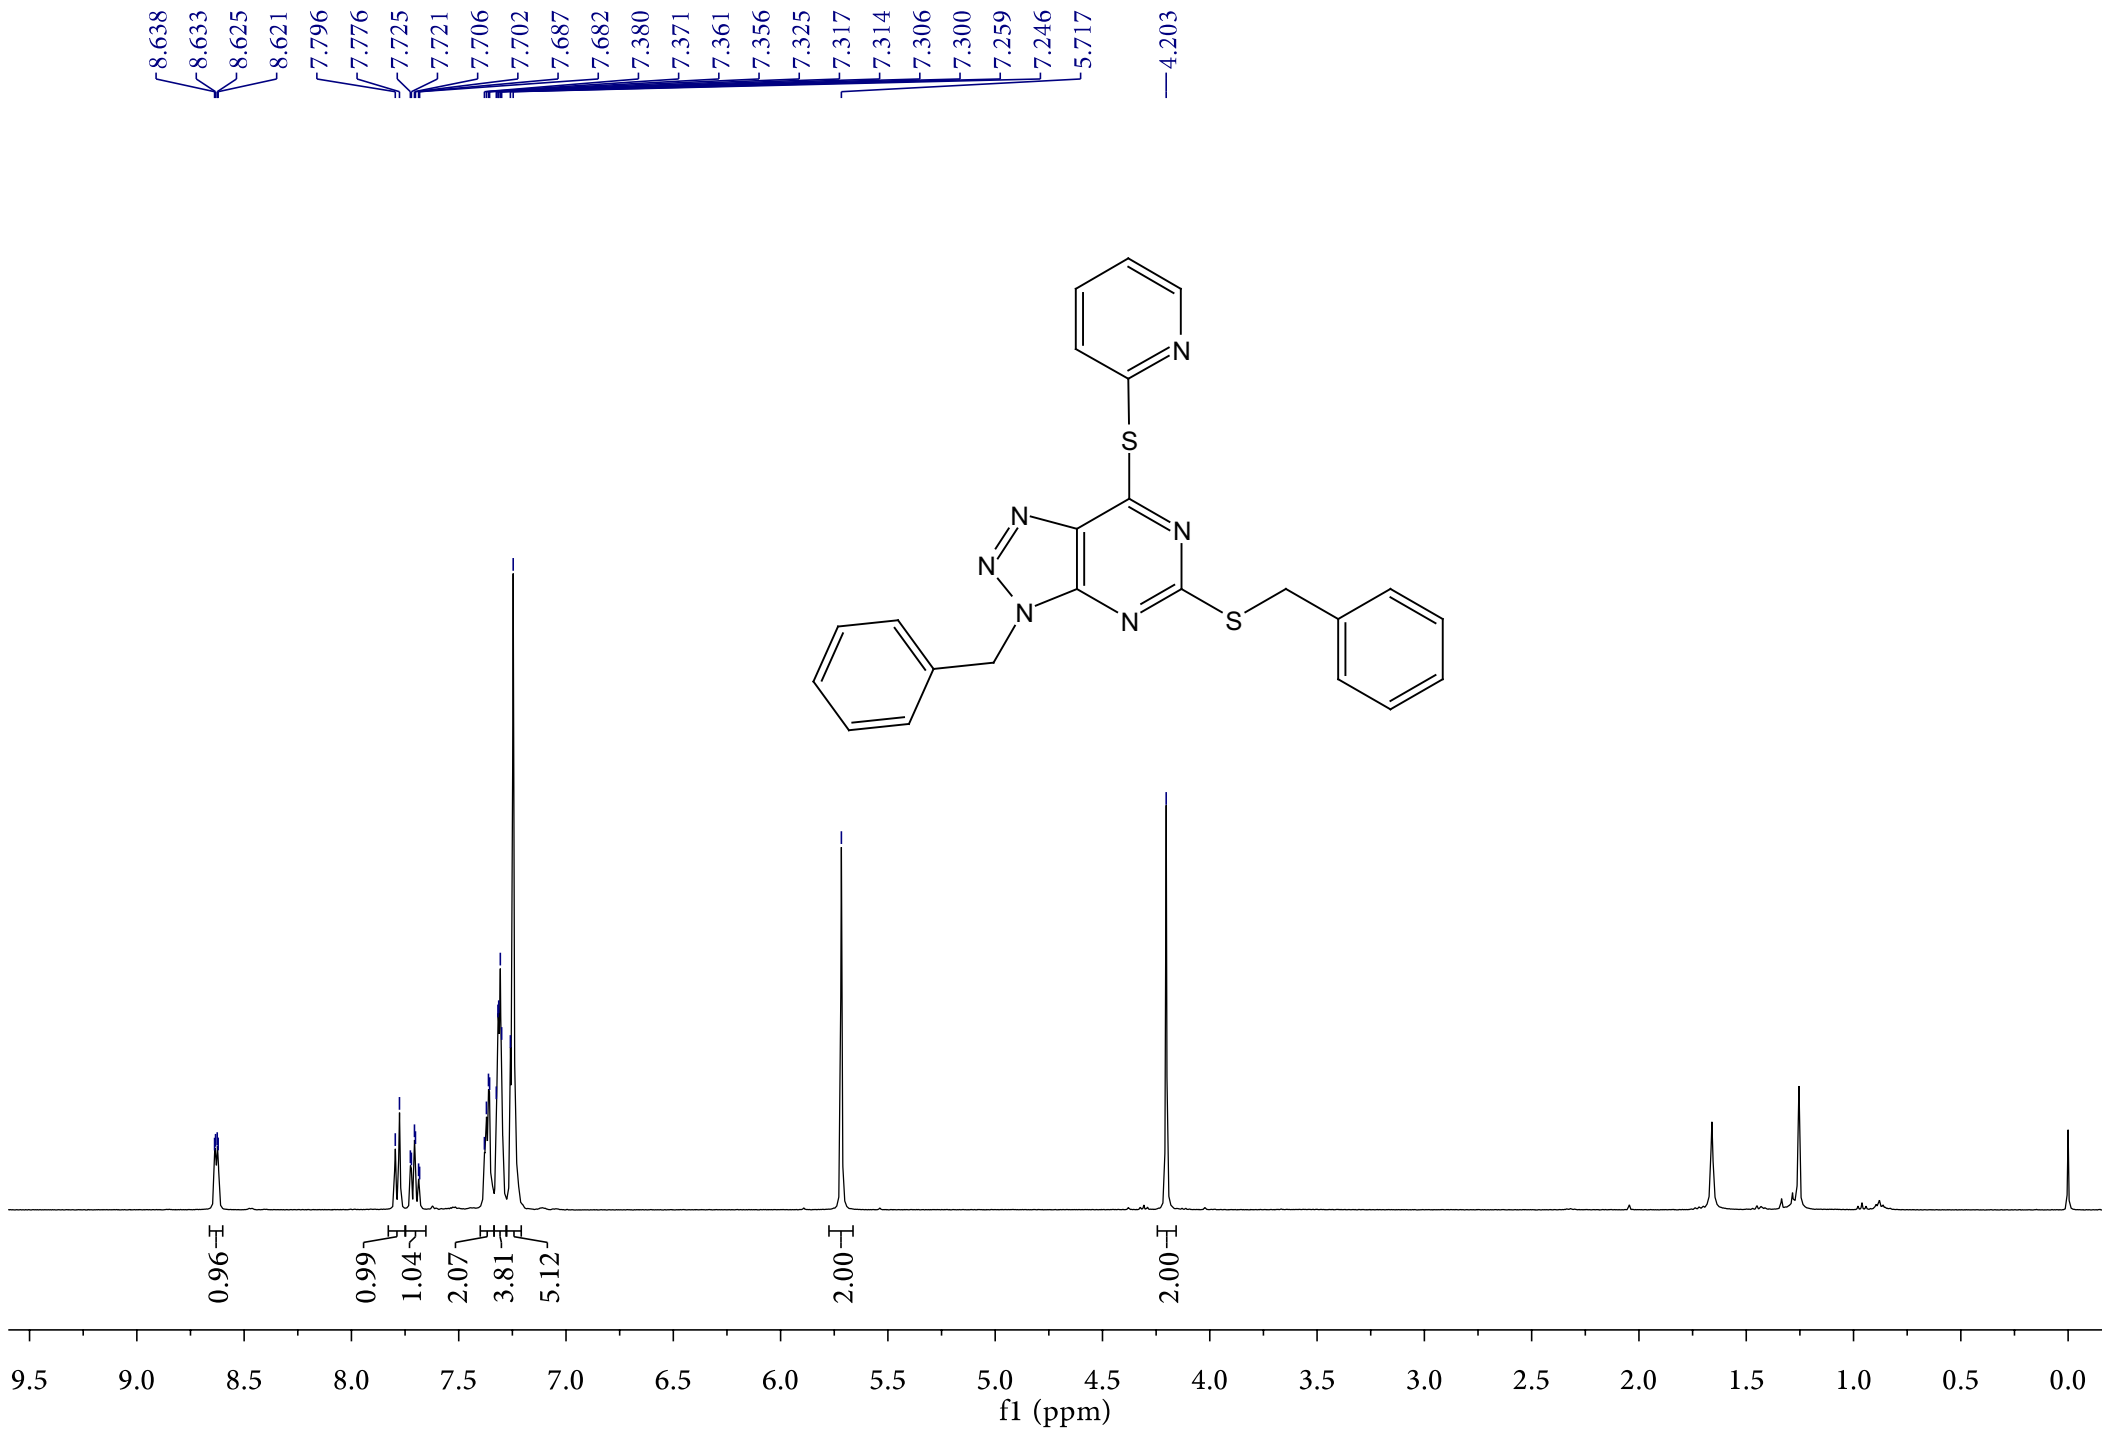

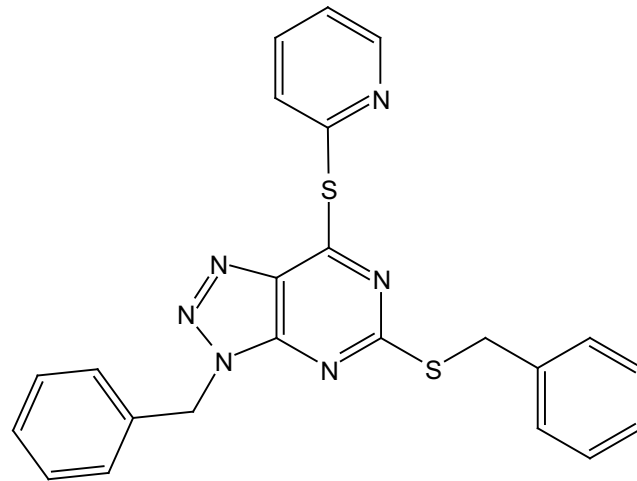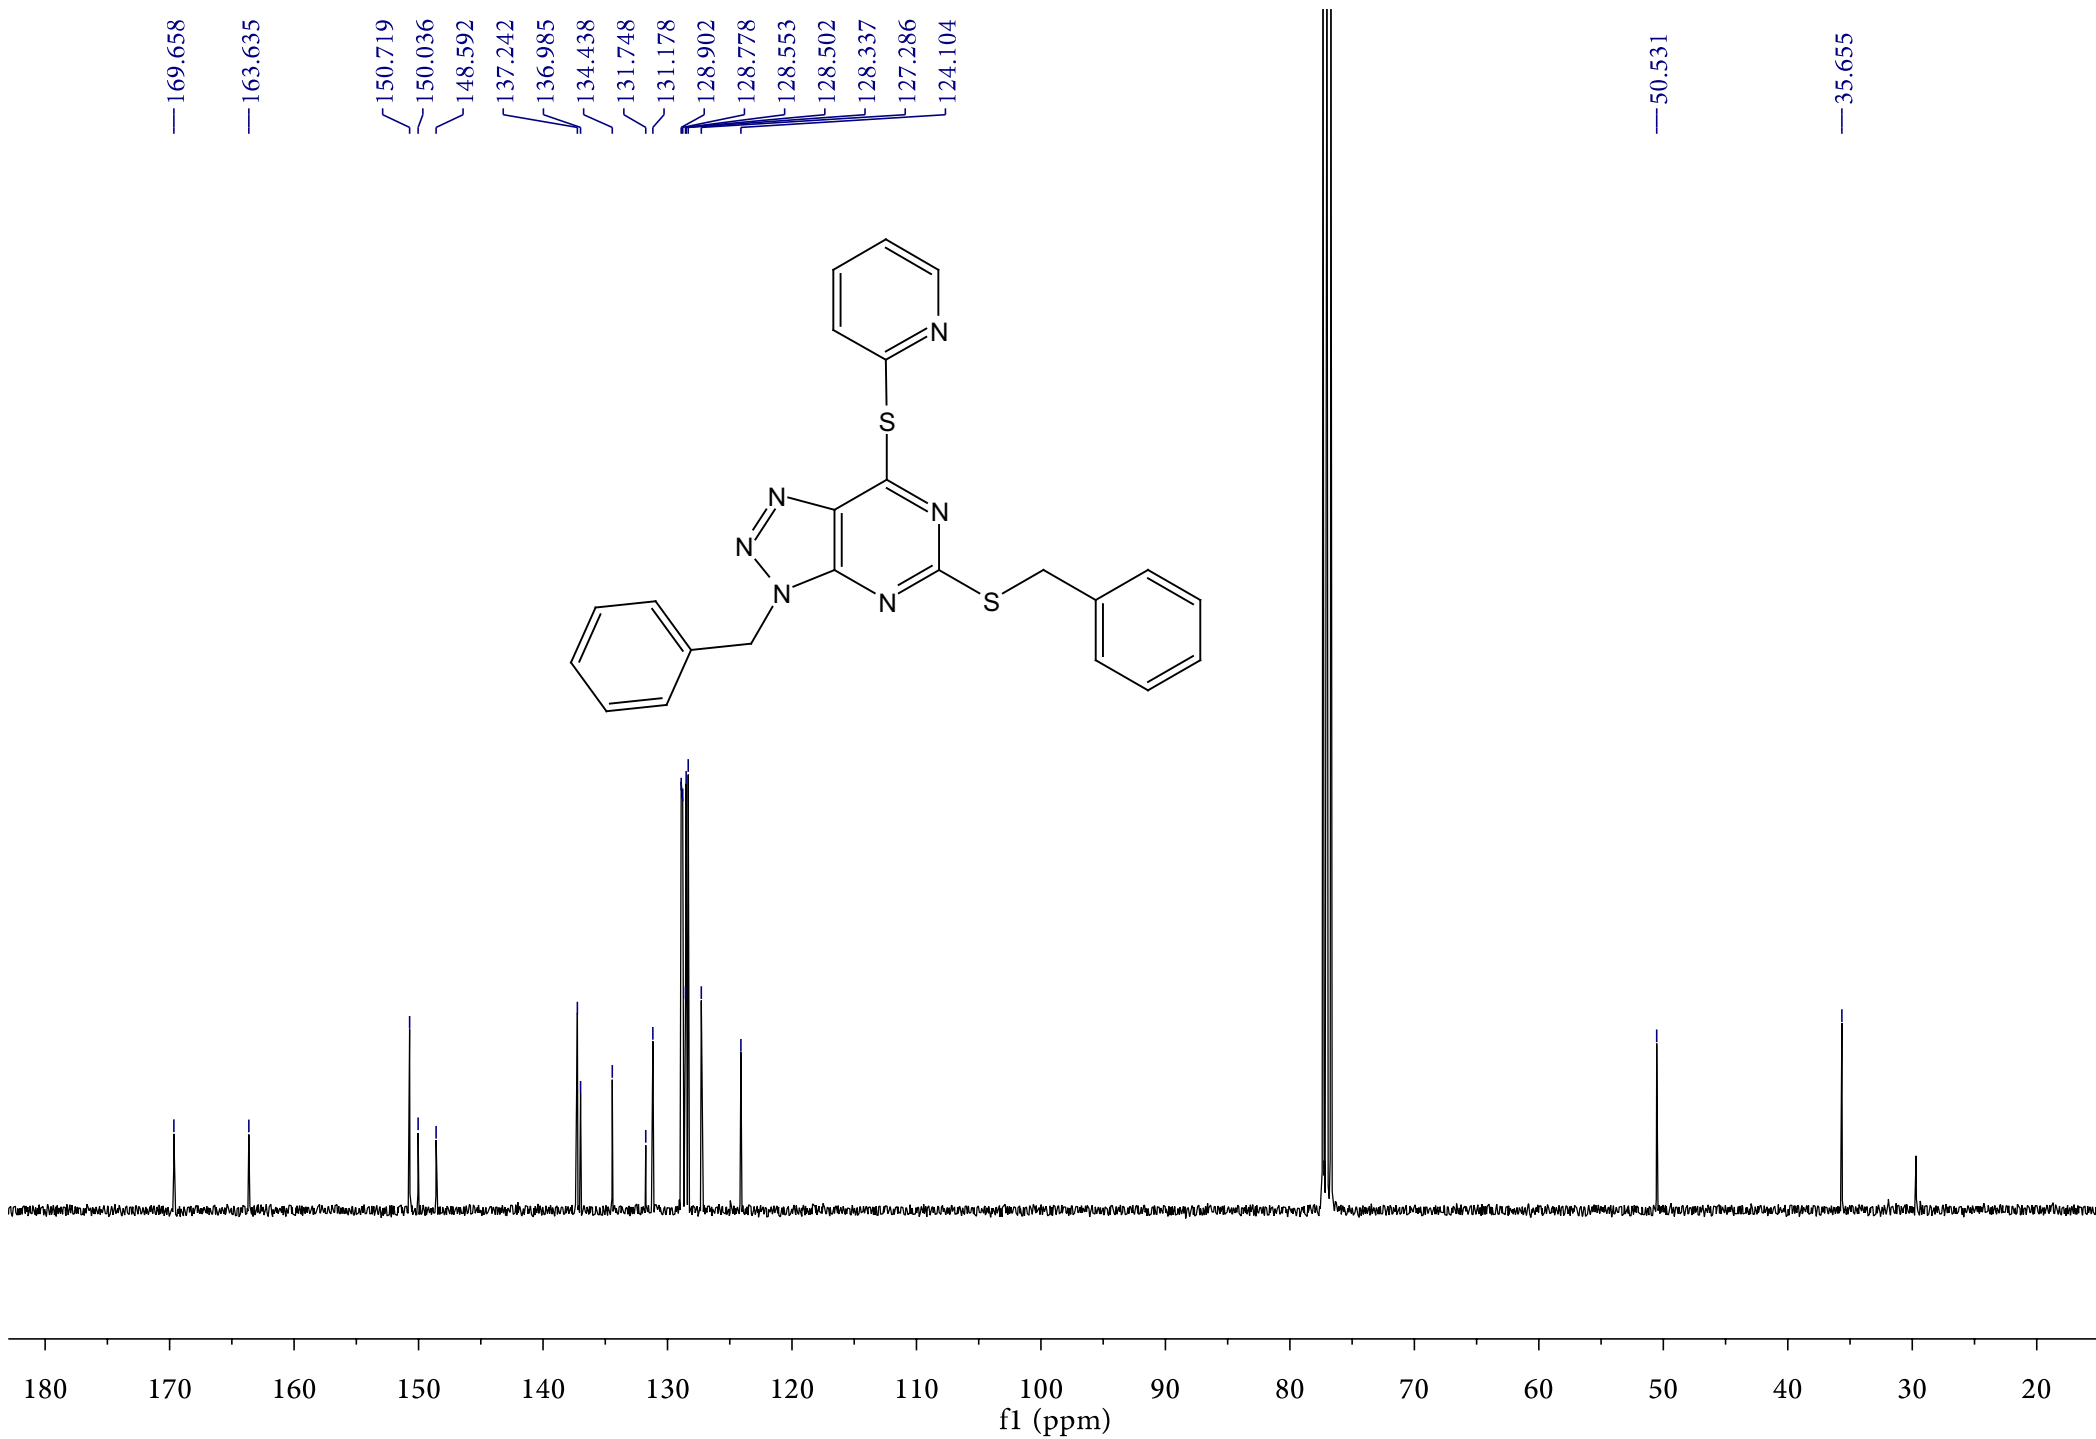

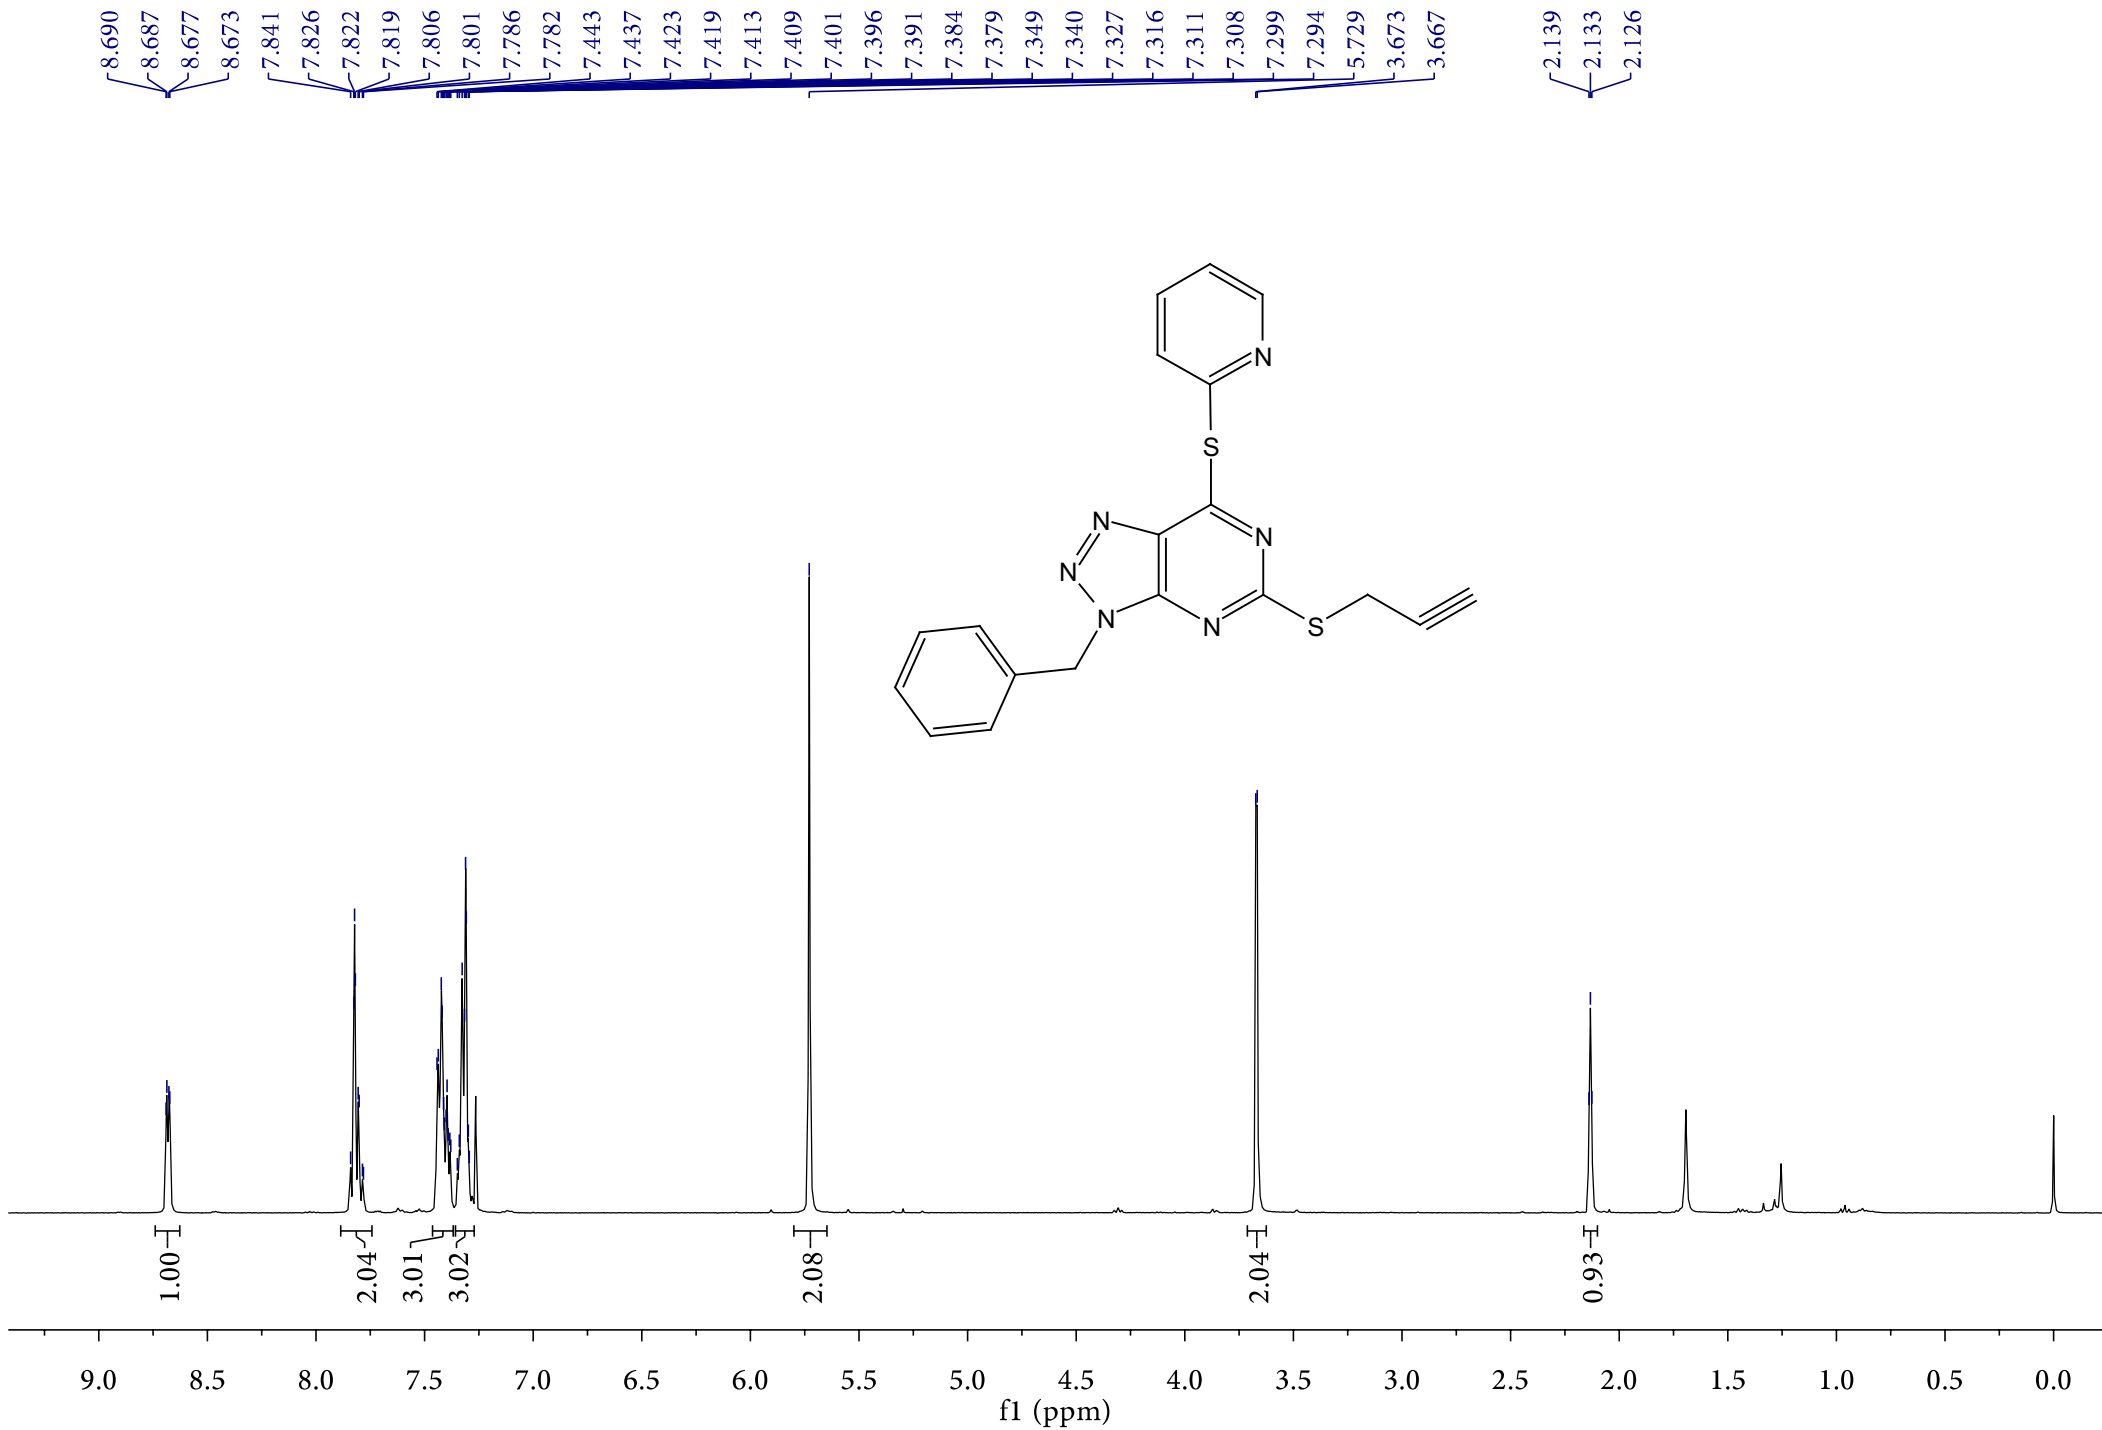

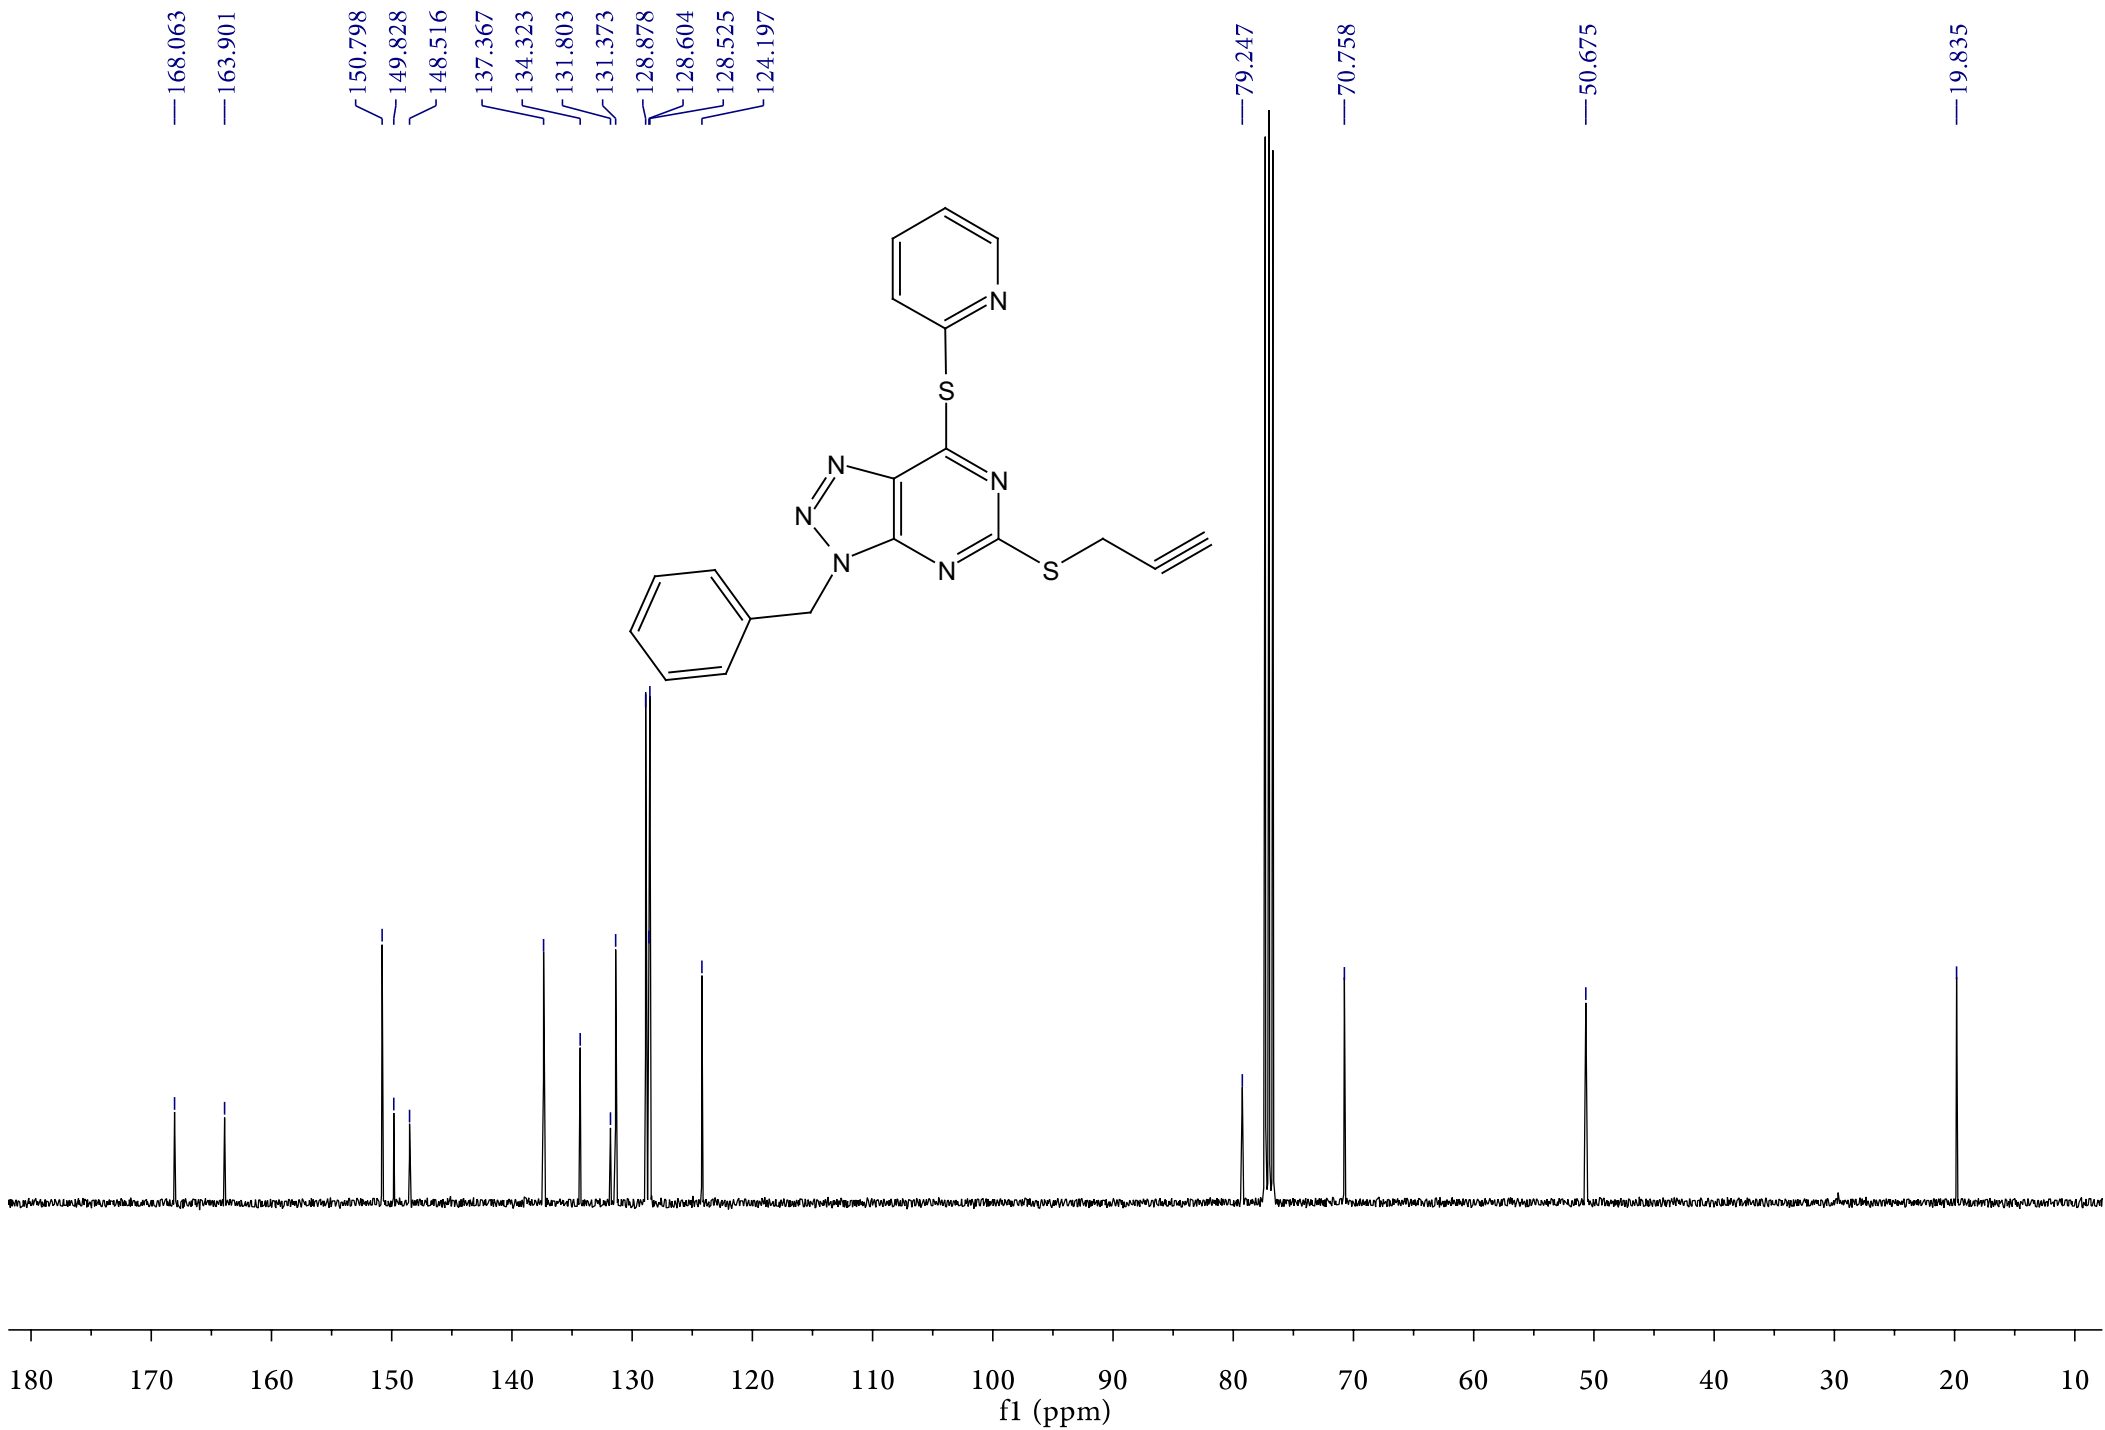

Supplement: ml6b00423_si_001.pdf [file ml6b00423_si_001.pdf]
